# Supplementary material for: Clustering phenotype populations by genome-wide RNAi and multiparametric imaging
Source: PubMed Central journal article supplement — Mol Syst Biol. 2010 Jun 8;6:370. doi: 10.1038/msb.2010.25 (PMC2913390; doi:10.1038/msb.2010.25), 2010-06-08
Supplement: msb201025-s1.pdf [file msb201025-s1.pdf]

# Supplementary Information

Florian Fuchs, Gregoire Pau, Dominique Kranz, Oleg Sklyar, Christoph Budjan,  
Sandra Steinbrink, Thomas Horn, Angelika Pedal,  
Wolfgang Huber, Michael Boutros

April 7, 2010

## Table of Contents

|          |                                                            |           |
|----------|------------------------------------------------------------|-----------|
| <b>1</b> | <b>Computational methods</b>                               | <b>3</b>  |
| 1.1      | Notation . . . . .                                         | 3         |
| 1.2      | Nucleus segmentation . . . . .                             | 3         |
| 1.3      | Channel calibration . . . . .                              | 3         |
| 1.4      | Cell segmentation . . . . .                                | 4         |
| 1.5      | Cell feature extraction . . . . .                          | 4         |
| 1.6      | Cell classification . . . . .                              | 7         |
| 1.7      | Per well quality control . . . . .                         | 8         |
| 1.8      | Perturbation phenotypic profiles and phenoprints . . . . . | 8         |
| 1.9      | Phenotypic distance metric learning . . . . .              | 9         |
| 1.9.1    | The distance measure . . . . .                             | 9         |
| 1.9.2    | Parameter optimization . . . . .                           | 9         |
| 1.10     | Hits . . . . .                                             | 11        |
| 1.11     | Screen quality diagnostics . . . . .                       | 11        |
| 1.12     | Phenotypic map . . . . .                                   | 11        |
| 1.12.1   | Overlap with functional networks . . . . .                 | 12        |
| 1.13     | Data and software availability and performance . . . . .   | 12        |
| <b>2</b> | <b>References</b>                                          | <b>13</b> |
|          | <b>Supplementary Figures</b>                               | <b>39</b> |
|          | <b>Supplementary Tables</b>                                | <b>39</b> |

## List of Supplementary Figures

|    |                                                                             |    |
|----|-----------------------------------------------------------------------------|----|
| 1  | Quality control excluded wells . . . . .                                    | 15 |
| 2  | Influence of feature selection on cell classification performance . . . . . | 16 |
| 3  | Sigmoid transformation. . . . .                                             | 17 |
| 4  | Distance metric learning optimization surface . . . . .                     | 18 |
| 5  | Distance distributions before and after learning . . . . .                  | 19 |
| 6  | Distribution of hits over the plates . . . . .                              | 20 |
| 7  | Heatmap of selected phenoprints . . . . .                                   | 21 |
| 8  | Leave-one-out experiment . . . . .                                          | 22 |
| 9  | Scatter plot of phenotypic distances . . . . .                              | 23 |
| 10 | siRNA pools efficiency on mRNA levels . . . . .                             | 24 |
| 11 | Single siRNAs efficiency on mRNA levels . . . . .                           | 25 |
| 12 | $\gamma$ H2AX foci formation with siRNA pools . . . . .                     | 26 |
| 13 | $\gamma$ H2AX foci formation with single DONSON siRNAs . . . . .            | 27 |
| 14 | Multipolar spindle formation induced by DONSON knockdown . . . . .          | 28 |
| 15 | hDONSON-HA colocalization with $\gamma$ -Tubulin . . . . .                  | 29 |

## List of Supplementary Tables

|      |                                                              |    |
|------|--------------------------------------------------------------|----|
| I    | RT-PCR primers and DONSON-HA PCR primers . . . . .           | 30 |
| II   | Cell classes . . . . .                                       | 31 |
| III  | Training set sizes . . . . .                                 | 32 |
| IV   | Classification accuracy . . . . .                            | 33 |
| V    | Confusion matrix. . . . .                                    | 34 |
| VI   | Predicted cell class sizes. . . . .                          | 35 |
| VII  | Perturbation phenotype descriptors and phenoprints . . . . . | 36 |
| VIII | Optimized parameters . . . . .                               | 37 |
| IX   | Cluster definition . . . . .                                 | 38 |
| X    | Retest phenotypes . . . . .                                  | 47 |
| XI   | Deconvoluted siRNA phenotypes . . . . .                      | 48 |
| XII  | siRNA sequences . . . . .                                    | 80 |

# 1 Computational methods

## 1.1 Notation

91356 images were obtained, each consisting of  $670 \times 510$  pixels and comprising 3 color channels each at 12 bit (0...4095) intensity resolution. We denote the input data for the three channels as follows: actin  $\mathbf{a}_0$ , tubulin  $\mathbf{t}_0$  and DNA  $\mathbf{d}_0$ .

## 1.2 Nucleus segmentation

We computed the nucleus mask  $\mathbf{N}$ , a binary image indicating those pixels that belong to a nucleus. It was defined by

$$\mathbf{N} = F\left(\gamma_K(\phi_K(\mathbf{d}_0 > \mathbf{d}_0 \star \mathbf{J} + \sigma_d))\right),$$

where  $\star$  is the convolution operator,  $\mathbf{J}$  is a constant matrix of size  $35 \times 35$  such that the sum of its elements is equal to 1,  $\sigma_d$  is a parameter,  $\mathbf{K}$  is a  $3 \times 3$  matrix of values (0, 1, 0; 1, 1, 1; 0, 1, 0),  $\phi_K$  is the morphological closing operator using  $\mathbf{K}$  as structuring element, and  $\gamma_K$  is the morphological opening operator. The operator  $F$  removes internal holes by applying floodfill starting from a point outside the objects and taking the complement. The computation of the nucleus mask  $\mathbf{N}$  can be seen as an algorithm where the nuclei are first extracted by performing a local adaptive thresholding on the DNA channel  $\mathbf{d}_0$  using a filter  $\mathbf{J}$  which is two times bigger than the biggest nuclei we want to detect, followed by two morphological operations to clean the nuclei perimeter and remove artefacts smaller than  $\mathbf{K}$  and a final step to remove internal holes.

A nucleus  $N$  is designated by the set of coordinates  $(i, j)$  of its pixels. The set of all nuclei  $\{N_i\}_i$  was computed using the watershed segmentation algorithm [2] performed on the distance map of the binary mask  $\mathbf{N}$ , with a height tolerance of 3. Nuclei which were: too faint ( $\text{Nint}/\text{Npxs} < 0.1$ , too small ( $\text{Npxs} < 150$ ) or too large ( $\text{Npxs} > 2070$ ) were excluded from the analysis. Here,  $\text{Npxs} = \sum_{i,j \in N} 1$  denotes the nucleus size in pixels and  $\text{Nint} = \sum_{i,j \in N} d_{ij}$  is the nucleus intensity.

## 1.3 Channel calibration

Let  $\mathbf{S}$  be the mask defined by  $\mathbf{S} = \delta_L(\mathbf{N}) \& !\varepsilon_L(\mathbf{N})$ , where  $\delta_L$  and  $\varepsilon_L$  are the morphological dilatation and erosion operators using the structuring element  $\mathbf{L}$ , which is here a binary disc of diameter 9. The calibrated channels  $\mathbf{a}$ ,  $\mathbf{t}$  and  $\mathbf{d}$  are then defined by:

$$\begin{aligned} \mathbf{a} &= \alpha_a(\mathbf{a}'/a'_S)^{\beta_a} \\ \mathbf{t} &= \alpha_t(\mathbf{t}'/t'_S)^{\beta_t} \\ \mathbf{d} &= \alpha_d(\mathbf{d}'/d'_N)^{\beta_d} \end{aligned}$$

where  $\mathbf{a}' = \mathbf{a}_0 - \bar{a}_0$ , with  $\bar{a}_0 = \sum_{i,j:a_{0,ij} < q} a_{0,ij} / \sum_{i,j:a_{0,ij} < q} 1$ ,  $q$  being the 1% quantile of  $\mathbf{a}_0$ ,  $\mathbf{t}'$  and  $\mathbf{d}'$  are defined in the same way as  $\mathbf{a}'$ , where  $a'_S =$

$\sum_{i,j} a'_{ij} S_{ij} / \sum_{i,j} S_{ij}$ ,  $t'_S = \sum_{i,j} t'_{ij} S_{ij} / \sum_{i,j} S_{ij}$ ,  $d'_N = \sum_{i,j} d'_{ij} N_{ij} / \sum_{i,j} N_{ij}$  and  $\alpha_a = 0.3$ ,  $\alpha_t = 0.4$ ,  $\alpha_d = 0.55$ ,  $\beta_a = 1.2$ ,  $\beta_t = 1.4$  and  $\beta_d = 1.4$ .

#### 1.4 Cell segmentation

To compute the cell mask  $\mathbf{C}$ , a binary image indicating the pixels belonging to any cell, we applied a global thresholding on the mixed channel

$$\mathbf{C} = \phi_K(\mathbf{m} \star \mathbf{K} > \mu_C),$$

where the mixed channel  $\mathbf{m}$  was defined by  $m_{ij} = \sqrt{a_{ij}^2 + t_{ij}^2 + d_{ij}^2}$ ,  $\mu_C = 0.12$ , and  $\mathbf{K}$  and  $\phi_K$  are as above.

A cell  $C$  is designated by the set of coordinates  $(i, j)$  of its pixels. The set of all cells  $\{C_i\}_i$  was computed using the Voronoi-based cell segmentation algorithm from Jones [6] on the image  $\mathbf{m}^{0.2}$ , with the seeds  $\{N_i\}_i$ , the cell mask  $\mathbf{C}$  and the regularization parameter  $\lambda = 0.1$ . Cells which were mangled because they were too close to the borders ( $\text{edg}/\text{per} > 0.3$ ), too small ( $\text{pxs} < 150$ ), too large ( $\text{pxs} > 14500$ ) or too long ( $\text{per} > 750$ ) were excluded from the analysis.  $\text{edg}$  is the number of pixels that are at the edge of the cell,  $\text{per}$  is the cell perimeter in pixels and  $\text{pxs} = \sum_{i,j \in C} 1$  is the cell size in pixels.

To fuse binucleated cells that were wrongly segmented as two distinct cells, the segmentation was postprocessed with a supervised learning method. Given a pair of cells, the decision of fusing them into one single cell or leaving them unchanged was learned using 17 features:  $\text{distp}$ ,  $\text{ext}^\oplus$ ,  $\text{ext}^\Delta$ ,  $\text{Next}^\oplus$ ,  $\text{Next}^\Delta$ ,  $\text{NCdist}^\oplus$ ,  $\text{NCdist}^\Delta$ ,  $\text{int}^\oplus$ ,  $\text{int}^\Delta$ ,  $\text{Nint}^\oplus$ ,  $\text{Nint}^\Delta$ ,  $\text{Nt.den}^\oplus$ ,  $\text{Nt.den}^\Delta$ ,  $\text{NtoATint}^\Delta$ ,  $\text{Tz.11}^\Delta$ ,  $\text{Az.11}^\Delta$  and  $\text{Nz.33}^\Delta$ . The feature  $\text{distp}$  is the Euclidean distance between two cell centers of mass, the superscripted  $\oplus$ -features are the cell pair mean corresponding features as defined in Section 1.5 and the superscripted  $\Delta$ -features are the cell pair absolute difference corresponding features. Only the cell pairs with a distance  $\text{distp}$  lower than 70 were considered. The training set consisted of a manually annotated set of 551 cell pairs that had to be fused and 1023 cell pairs that had to be left unchanged. Using a binary support vector machine (SVM) with a radial kernel, the parameters  $(C, \gamma)$  were optimized using grid search through 5-fold cross-validation to maximize the prediction rate. Optimal values  $C = 10$  and  $\gamma = 0.4$  led to a correct prediction rate of 87.7%.

#### 1.5 Cell feature extraction

Each cell was characterized by a set of 51 morphological descriptors also referred to as features, which were grouped into four categories: 9 geometric features, 26 Haralick textural features, 11 Zernike moments and 5 miscellaneous features. All descriptors are translation and rotation invariant and are commonly used in cell imaging [9, 8] for classification purposes.

**Geometric features** Geometric features were used to quantify the shape of each cell and of its nucleus. They can be expressed in terms of low-order image moments, computed on the mixed component  $\mathbf{m}$  over the cell domain  $C$  and on the DNA channel  $d$  over the nucleus region  $N$ . The raw  $(p, q)$ -moment  $\mu_{pq}^c$  of the component  $\mathbf{m}$  over  $C$  is  $\mu_{pq}^c = \sum_{i,j \in C} i^p j^q m_{ij}$ . The centered  $(p, q)$ -moment  $\bar{\mu}_{pq}^c$  is  $\bar{\mu}_{pq}^c = \sum_{i,j \in C} (i - \mu_{10}^c/\mu_{00}^c)^p (j - \mu_{01}^c/\mu_{00}^c)^q m_{ij}$ . The moments of the DNA component  $\mathbf{d}$  over the nucleus domain  $N$  were defined in the same way and were denoted by  $\mu_{pq}^n$  and  $\bar{\mu}_{pq}^n$ .

- **int** - Cell intensity,  $\mathbf{int} = \mu_{00}^c$ .
- **ext** - Cell extension,  $\mathbf{ext} = (\lambda_1^c \lambda_2^c)^{1/4}$  where  $\lambda_1^c$  and  $\lambda_2^c$  are the eigenvalues of the covariance matrix of the mixed component  $\mathbf{m}$  computed over the cell  $C$ , given by  $\lambda_1 = \bar{\mu}_{00}^c (\bar{\mu}_{20}^c + \bar{\mu}_{02}^c + \Delta)/2$  and  $\lambda_2 = \bar{\mu}_{00}^c (\bar{\mu}_{20}^c + \bar{\mu}_{02}^c - \Delta)/2$  with  $\Delta = \bar{\mu}_{00}^c \sqrt{4\bar{\mu}_{11}^c{}^2 + (\bar{\mu}_{20}^c - \bar{\mu}_{02}^c)^2}$ . This parameter can also be interpreted as the geometric mean of the lengths of the axes of an ellipse fitted to the cell shape.
- **ecc** - Cell eccentricity,  $\mathbf{ecc} = \sqrt{1 - \lambda_2^c/\lambda_1^c}$ .
- **Nint** - Nucleus intensity,  $\mathbf{Nint} = \mu_{00}^n$ .
- **Next** - Nucleus extension,  $\mathbf{Next} = (\lambda_1^n \lambda_2^n)^{1/4}$ , where  $\lambda_1^n$  and  $\lambda_2^n$  were computed in the same way as  $\lambda_1^c$  and  $\lambda_2^c$ , but on the DNA channel  $d$  over the nucleus domain  $N$ .
- **Necc** - Nucleus eccentricity,  $\mathbf{Necc} = \sqrt{1 - \lambda_2^n/\lambda_1^n}$ .
- **NtoATsz** - Nucleus to cell size ratio,  $\mathbf{NtoATsz} = \mathbf{Next}^2/\mathbf{ext}^2$ .
- **NtoATint** - Nucleus to cell intensity ratio,  $\mathbf{NtoATint} = \mathbf{Nint}/\mathbf{int}$ .
- **NCdist** - Distance between the nucleus center of mass to the cell center of mass,  $\mathbf{NCdist} = \sqrt{(\mu_{10}^n/\mu_{00}^n - \mu_{10}^c/\mu_{00}^c)^2 + (\mu_{01}^n/\mu_{00}^n - \mu_{01}^c/\mu_{00}^c)^2}$ .

**Haralick textural features** Haralick textural features [10] are a set of statistical measures derived from the gray levels co-occurrence matrix (GLCM)  $f$ . This matrix represents the frequency  $f_{ij}$  that a pixel of intensity  $i$  has a right, bottom, right-bottom or left-bottom neighbour of intensity  $j$ . When computed over  $p$  different gray levels, the GLCM  $f$  is by construction a  $p \times p$  symmetric matrix which fulfills  $\sum_{i,j} f_{ij} = 1$ .

- **asm** - Angular second moment,  $\mathbf{asm} = \sum_{i,j} f_{ij}^2$ .
- **con** - Contrast,  $\mathbf{con} = \sum_{k=0}^{p-1} k^2 \sum_{i,j : |i-j|=k} f_{ij}$ .
- **cor** - Correlation,  $\mathbf{cor} = (\sum_{i,j} ij f_{ij} - \mu_1 \mu_2) / \sigma_1 \sigma_2$ , where  $\mu_1$ ,  $\mu_2$ ,  $\sigma_1$  and  $\sigma_2$  are the means and standard deviations of the marginal frequencies  $f_{i.} = \sum_j f_{ij}$  and  $f_{.j} = \sum_i f_{ij}$ .

- **var** - Sum of squares variance  $\mathbf{asm} = \sum_{i,j} (i - \mu_1)^2 f_{ij}$ .
- **idm** - Inverse difference moment,  $\mathbf{idf} = \sum_{i,j} f_{ij} / (1 + (i - j)^2)$ .
- **sav** - Sum average,  $\mathbf{sav} = \sum_{k=2}^{2p} k f_k^+$ , where  $f_k^+ = \sum_{i,j : i+j=k} f_{ij}$ .
- **sva** - Sum variance,  $\mathbf{sav} = \sum_{k=2}^{2p} (k - \mathbf{sen})^2 f_k^+$  (original Haralick formula), where  $f_k^+ = \sum_{i,j : i+j=k} f_{ij}$ .
- **sen** - Sum entropy,  $\mathbf{sen} = - \sum_{k=2}^{2p} f_k^+ \log f_k^+$ .
- **ent** - Entropy,  $\mathbf{ent} = - \sum_{i,j} f_{ij} \log f_{ij}$ .
- **dva** - Difference variance,  $\mathbf{dva} = \sum_{k=0}^{p-1} k^2 f_k^- - (\sum_{k=0}^{p-1} k f_k^-)^2$ , where  $f_k^- = \sum_{i,j : |i-j|=k} f_{ij}$ .
- **den** - Difference entropy,  $\mathbf{den} = - \sum_{k=0}^{p-1} f_k^- \log f_k^-$ .
- **f12** - Information measure,  $\mathbf{f12} = (\sum_{i,j} f_{ij} \log f_{ij} - \sum_{i,j} f_{ij} \log(f_i \cdot f_j)) / \alpha$  where  $\alpha = \max(\sum_i f_i \log f_i, \sum_j f_j \log f_j)$ .

Actin and tubulin cell textures were captured by the previously defined 12 Haralick features, computed on the actin channel  $a$  (prefixed by **At**) and the tubulin channel  $t$  (prefixed by **Tt**) on the cell domain  $C$  using  $p = 32$  gray levels. Nucleus texture was captured by the **ent** and **den** Haralick features, computed on the DNA channel  $d$  (prefixed by **Nt**) on the nucleus domain  $N$ .

**Zernike moments** Complex Zernike polynomials are a set of orthogonal polar polynomials over the unit disk. Projection of an image onto them gives rise to Zernike moments [12], which are useful to characterize texture information. Zernike  $(m, n)$ -moments  $Z_{mn}$  of a centered and scaled to the unit disk image  $P_{xy} : x^2 + y^2 \leq 1$  are defined by:

$$Z_{mn} = \frac{m+1}{\pi} \sum_{\substack{x,y \\ x^2+y^2 \leq 1}} P_{xy}[V_{mn}(x,y)]^* S$$

where

$$\begin{aligned} x &= r \cos \theta \\ y &= r \sin \theta \\ V_{mn}(r, \theta) &= R_{mn}(r) \exp(jn\theta) \\ R_{mn}(r) &= \sum_{s=0}^{\frac{m-|n|}{2}} (-1)^s F(m, n, s, r) \\ F(m, n, s, r) &= \frac{(m-s)!}{s! \binom{m+|n|}{2} - s! \binom{m-|n|}{2} - s!} r^{m-2s} \end{aligned}$$

The absolute values of the Zernike moments  $Z_{11}$ ,  $Z_{22}$ ,  $Z_{31}$ ,  $Z_{33}$  and  $Z_{44}$  were used to describe the texture of the actin channel  $a$  (prefixed by **Az**) and the

tubulin channel  $t$  (prefixed by **Tz**) computed on the cell domain  $C$ . The Zernike moment  $Z_{33}$  was the only one used to describe the texture of the DNA channel  $d$  (prefixed by **Nz**), computed on the nucleus domain  $N$ .

**Miscellaneous features** The following features were also used to further describe the morphology of a cell:

- **AI1** - First translation, rotation and scale-invariant Hu's moment [5] computed on the actin component  $\mathbf{a}$  over the cell domain  $C$ . By definition  $\text{AI1} = (\bar{\mu}_{20} + \bar{\mu}_{02}) / \bar{\mu}_{00}^2$ , where  $\bar{\mu}_{pq}^a$  is the centered  $(p, q)$ -moment of  $\mathbf{a}$  computed over the support  $C$ , i. e.  $\bar{\mu}_{pq}^a = \sum_{i,j \in C} (i - \mu_{10}^a / \mu_{00}^a)^p (j - \mu_{01}^a / \mu_{00}^a)^q a_{ij}$ , where  $\mu_{pq}^a = \sum_{i,j \in C} i^p j^q a_{ij}$ .
- **TI1** - First Hu's moment, computed in the same way as **AI1** on the tubulin component  $\mathbf{t}$  over the cell domain  $C$ .
- **AinNint** - Nucleus actin intensity to cell actin intensity ratio,  $\text{AinNint} = \sum_{i,j \in N} a_{ij} / \mu_{00}^a$ .
- **TinNint** - Nucleus tubulin intensity to cell tubulin intensity ratio,  $\text{TinNint} = \sum_{i,j \in N} t_{ij} / \mu_{00}^t$ .
- **AtoTint** - Cell actin intensity to cell tubulin intensity ratio,  $\text{AtoTint} = \mu_{00}^a / \mu_{00}^t$ .

## 1.6 Cell classification

Based on their features, cells were classified into the 10 cell classes described in Table SII using the 'one-against-one' multi-class strategy of the SVM algorithm as provided by the `libsvm` [3] library via the R package `e1071`. Cell features were standardized to zero mean and unit variance, computed on all the cells from the screen.

**Training set** A set of 2545 manually annotated cells distributed according to Table SIII was selected to train the SVM.

**Cross-validation performance** Using a radial kernel, the SVM parameters  $(C, \gamma)$  were optimized using grid search through 5-fold cross-validation to maximize the mean class prediction rate. Optimal values  $C = 200$  and  $\gamma = 5.10^{-4}$  led to a mean prediction rate of 83.4%. Class-specific prediction rates are given in Table SIV and the full confusion table is shown in Table SV.

**Results** Distribution of the predicted cell classes from all the cells of the screen is shown in Table SVI.

**Influence of the feature set on classification performance** To test the importance of individual features and their redundancy, we conducted a numerical experiment using greedy feature selection: Starting with the original set of  $n = 51$  features, we removed independently every feature to produce  $n$  sets of  $n - 1$  features and computed the 5-fold cross-validation classification performances, in the same way as described above, for each of these sets. We iterated the process and removed at each step the feature which least decreased the classification performance. Results are presented in Fig. S2 and show that the classification performance remains almost constant between 51 and 24 features, with a constant and low variability. This suggests that (i) the classification performance is not driven by individual features, but rather depends on the joint behavior of multiple features and (ii) that there is redundancy between features. These properties contribute to the robustness of our method.

### 1.7 Per well quality control

To discard a small fraction of the data that showed apparent quality problems, for example due to marker stains, sporadic out-of-focus images and plate edge effects, we devised a scheme that detected outliers in the feature value distributions (e. g., too many dead cells, too many cells, too few cells). Data of poor quality was filtered on the *per well* level, and the locations of the filtered wells are shown in Fig. S1.

### 1.8 Perturbation phenotypic profiles and phenoprints

Each well subject to an RNAi perturbation was summarized by a vector  $\mathbf{x} \in \mathbb{R}^p$  of  $p = 13$  numerical values, corresponding to the rows of Table SVII.  $\mathbf{x}$  is termed a *phenotypic profile*.

To take into account the experimental variability of the phenotypic profiles  $\mathbf{x} = (x_1, \dots, x_{13})$ , and to compensate for observed batch effects due to apparent systematic shifts in experimental conditions, we devised a normalisation and data transformation method. The values  $x_i$  were transformed to the range  $[0, 1]$  using a parameterized sigmoid function. A value of 1 indicated clear presence of the phenotype, a value of 0 clear absence, and values in between were allowed for a range of intermediate, less certain observations. The motivation for this transformation is the assumption that our phenotypes of interest can be modelled, to useful approximation, as being binary (absent or present), and that transformed values are subject to less experimental variability.

Thus, each well subject to an RNAi perturbation was summarized by a *phenoprint*  $\mathbf{y} \in [0, 1]^{19}$  as described in Table SVII.

For each of the components  $x_k$  of  $\mathbf{x}$ , we considered whether its value was significantly elevated, resulting in  $y_k^+$ ; for 6 of the components, we also considered whether it was significantly decreased, resulting in  $y_k^-$ .  $y_k^+$  and  $y_k^-$  were obtained from by the following transformations:



$$y_k^+ = \frac{1}{1 + \exp(-\eta^+(x_k - \alpha^+))} \quad \text{with} \quad \begin{cases} \alpha^+ = F_{a_k^+}(\mathcal{B}_k^{\mathbf{x}}) \\ \beta^+ = F_{b_k^+}(\mathcal{B}_k^{\mathbf{x}}) \\ \eta^+ = \log(3)/(\beta^+ - \alpha^+) \end{cases}$$

$$y_k^- = \frac{1}{1 + \exp(-\eta^-(x_k - \alpha^-))} \quad \text{with} \quad \begin{cases} \alpha^- = 1 - F_{a_k^-}(\mathcal{B}_k^{\mathbf{x}}) \\ \beta^- = 1 - F_{b_k^-}(\mathcal{B}_k^{\mathbf{x}}) \\ \eta^- = \log(3)/(\beta^- - \alpha^-) \end{cases}$$

Here  $k = 1, \dots, 13$  indexes the perturbation descriptors,  $\mathcal{B}_k^{\mathbf{x}}$  is the sample of values of the  $k$ -th descriptor for all perturbations in the same experimental batch as  $\mathbf{x}$ , and  $F_q(\mathcal{B}_k^{\mathbf{x}})$  is the  $q$ -th quantile of this sample.  $a_k^+$ ,  $a_k^-$ ,  $b_k^+$ ,  $b_k^-$  are parameters of the transformation that were obtained as described in Section 1.9. These parameters control the location and slope of the transformation functions and are defined such that their transformed values will be 1/2 and 3/4, respectively. Hence they can be interpreted as follows:  $a_k^+$  (resp.  $a_k^-$ ) represent the fraction of perturbations in the batch that show a significant increase (resp. decrease) in the values of the descriptor  $k$ ,  $b_k^+$  (resp.  $b_k^-$ ) is the fraction of perturbations in the batch that show a significant and particularly strong increase (resp. decrease) in the values of the descriptor  $k$ . The transformation functions and the role of the parameters is illustrated in Fig. S3.

## 1.9 Phenotypic distance metric learning

### 1.9.1 The distance measure

The phenotypic distance between two phenoprints  $\mathbf{y}_1$  and  $\mathbf{y}_2$  is defined by:

$$d(\mathbf{y}_1, \mathbf{y}_2) = \sum_k \left[ \left| \max\left(\frac{1}{2}, y_{1,k}^+\right) - \max\left(\frac{1}{2}, y_{2,k}^+\right) \right| + \left| \max\left(\frac{1}{2}, y_{1,k}^-\right) - \max\left(\frac{1}{2}, y_{2,k}^-\right) \right| \right] / \gamma$$

with  $\gamma = \max(p(\mathbf{y}_1), p(\mathbf{y}_2))$ , where  $p(\mathbf{y})$  is the number of significant phenotypic traits of the phenoprint  $\mathbf{y}$ , defined by  $p(\mathbf{y}) = \# \{k \mid y_{1,k}^+ > \frac{1}{2} \text{ or } y_{1,k}^- > \frac{1}{2}\}$ . The distance  $d$  ranges from 0 (perturbations showing identical phenoprint) to 1 (perturbations showing distinct phenoprints). The phenoprint  $\mathbf{y}$  of a perturbation is said to show a phenotype (i. e. is a hit) if  $p(\mathbf{y}) > 0$ .

### 1.9.2 Parameter optimization

To determine suitable values for the parameters  $\{a_k^+, b_k^+, a_k^-, b_k^-\}$ , for  $k = 1, \dots, 13$ , we used a distance learning approach [13]. For this approach, two training sets were needed: first, a set of pairs of perturbations  $\mathcal{S}$  that should be enriched for similar phenotypes, and second, a set of pairs of perturbation that should be unrelated. The enrichment need not be strong or even perfect for the method to be applicable.

For  $\mathcal{S}$ , we used the graph of functionally associated human gene pairs from the STRING database version 7.1 [11] with confidence greater than a threshold of 0.4, subset to the genes for which we had data. For the reference set, we used random graphs which were obtained from  $\mathcal{S}$  by node permutation. Denoting by  $\mathcal{R}_r$  the  $r$ -th random graph ( $r = 1, \dots, W$ ), with  $W = 64$ , the parameters  $\{a_k^+, a_k^-, b_k^+, b_k^-\}_{1 \leq k \leq p}$  were chosen to maximize the following criterion:

$$J = \frac{1}{W} \sum_{r=1}^W \frac{\#\{(i, j) \in \mathcal{S} : p(\mathbf{y}_i) > 0, p(\mathbf{y}_j) > 0 \text{ and } d(\mathbf{y}_i, \mathbf{y}_j) \leq \theta\}}{\#\{(i, j) \in \mathcal{R}_r : p(\mathbf{y}_i) > 0, p(\mathbf{y}_j) > 0 \text{ and } d(\mathbf{y}_i, \mathbf{y}_j) \leq \theta\}} \quad (1)$$

with  $\theta = 0.2$ .

$\mathcal{S}$  contained 131692 edges (pairs of wells) and the phenoprint  $\mathbf{y} = (\mathbf{y}^+, \mathbf{y}^-)$  contained 19 elements, requiring the optimization of 38 parameters  $\{a_k^+, a_k^-, b_k^+, b_k^-\}$ . Maximization of  $J$  was performed using a sequence of calls to the Nelder-Mead and BFGS algorithms, under the constraints  $0 < \{a_k^+, a_k^-, b_k^+, b_k^-\} < 1$  and using as initial values the parameters  $\{a_k^+, a_k^-\} = 3\%$  and  $\{b_k^+, b_k^-\} = 1\%$ , jittered with some random noise for all  $k$ . This maximization strategy was chosen in order to cope with the roughness of the criterion  $J$ , as illustrated in Fig. S4. Control phenoprints and wells which did not pass the quality control were not considered for the optimization. After optimization, the criterion  $J$  had a value of  $J = 2.84$ , corresponding to the enrichment ratio of gene pairs having a phenotypic distance smaller than  $\theta$  being in STRING, compared to random graphs. The resulting 38 parameter values are shown in Table SVIII.

The distribution of pairwise distances in  $\mathcal{S}$  and  $\{\mathcal{R}_k\}_{1 \leq k \leq W}$  is shown in Fig. S5 before and after optimization. The distributions are approximately similar before optimization, while a mixture component of small distances (in the interval  $[0, 0.2]$ ) is clearly enriched in the distribution of  $\mathcal{S}$  (red) compared to the random one  $\{\mathcal{R}_k\}_{1 \leq k \leq W}$ . This peak contains STRING gene pairs that also show similar phenotypes in our screen.

To verify that we were not overfitting, we repeated this procedure with node-permuted random graphs instead of  $\mathcal{S}$ . This always obtained poor  $J$  scores of not more than about 1.1, and the resulting optimized distributions did not show an enrichment for shorter distances of the sort seen in Fig. S5.

However, to confirm that the predicted edges were not overfitting artifacts, we carried out for each of the 9 genes shown in Figure 3B, a jackknife experiment consisting of re-learning the phenotypic distances on the STRING network leaving out the considered gene. We showed that their corresponding 9phenoprints were similar with and without using the gene for learning the parameters that result in the network (Fig. S8). This jackknife analysis indicates that we do not predict individual edges based on their presence in STRING, but rather STRING is used in an agglomerative manner, and all our specific predictions are driven by similarity of the image data.

## 1.10 Hits

Using the optimized parameters of Table SVIII to compute the phenoprints, 1820 perturbations showed a phenotype, i.e. had  $p(\mathbf{y}_k) > 0$ . This number is excluding control well and wells that were discarded in the quality control step. The spatial distribution of the hits is shown in Fig. S6.

Selected perturbations can be arranged into a heatmap, as in Fig. S7, using the phenotypic distance  $d$  for hierarchical clustering. Genes sharing the same function (e.g. COPx) often tend to cluster together.

## 1.11 Screen quality diagnostics

The  $Z'$ -factor [14] is a commonly used tool to quantify the quality of high-throughput screening assays. We used its multivariate generalization

$$\begin{aligned} Z' &= 1 - 3 \frac{\sigma_1 + \sigma_2}{\|\mathbf{d}\|} \\ \mathbf{d} &= \boldsymbol{\mu}_1 - \boldsymbol{\mu}_2 \\ \boldsymbol{\mu}_g &= \frac{1}{\#G_g} \sum_{i \in G_g} \mathbf{y}_i \quad g = 1, 2 \\ \sigma_g^2 &= \frac{1}{\#G_g - 1} \sum_{i \in G_g} \left( (\mathbf{y}_i - \boldsymbol{\mu}_g) \cdot \frac{\mathbf{d}}{\|\mathbf{d}\|} \right)^2 \end{aligned}$$

where  $G_1$  and  $G_2$  were sets of positive (PLK1) and negative (*Rluc*) controls. This yielded

$$Z' = 0.39.$$

## 1.12 Phenotypic map

In order to show a global map of all the phenotypes that occurred in the assay, the phenotypic hits were displayed in a graph to show similarity and dissimilarity relationships between them, using the phenotypic distance previously defined. The `neato` spring-model algorithm from `graphviz` [4] was used to layout the graph. For rendering, 87436 edges with a phenotypic distance  $< 0.16$  were shown, and only the large connected component (comprising 1806 of a total of 1820 nodes) was drawn. The other connected components were of size 5 or smaller. The phenotypic map is available on <http://www.ebi.ac.uk/huber-srv/cellmorph/data.php>.

The comparison between the original distances and the distances in the 2-dimensional embedding induced by the graph layout is shown in the scatter plot of Fig. S9. The Spearman correlation coefficient between them is 0.83, implying that generally the distance relationships are well captured by the 2D embedding.

17 clusters of tightly connected nodes were marked in the phenotypic map, defined by their centers and radii in Table SIX, and rendered with different colors.

### 1.12.1 Overlap with functional networks

To validate the potential of our measured phenotypic similarities to predict functional relationships, we compared the global overlap between the phenotypic similarity graph and three functional networks of *M. musculus* genes from MouseNet v.1 [7]. After homology mapping to *H. sapiens* using MGI gene annotation, we computed the  $2 \times 2$  contingency table of gene pairs with respect to (i) being an edge in the MouseNet network and (ii) being an edge in our phenotypic graph, using a two-sided Fisher’s test. We only considered the gene pairs that are strongly similar by keeping the edges in the phenotypic graph that have a phenotypic distance smaller than 0.01. This resulted in a graph of 1376 nodes and 18414 edges.

The MouseNet Molecular Function (MF) network, restricted to the 1376 aforementioned nodes, consisted of 486 nodes and 1781 edges. 57 edges were common to the phenotypic graph and the MouseNet MF network. We showed that the MouseNet MF network was significantly enriched with gene pairs with similar phenotypes (odds ratio 1.66, Fisher’s test,  $P = 3.93 \times 10^{-4}$ ). In the MouseNet Biological Process network, which restriction consisted of 503 nodes and 1785 edges, we observed an enrichment ratio of 1.54 (Fisher’s test,  $P = 3.37 \times 10^{-4}$ ). Although modest, these enrichment ratios are highly significant and show that the loss-of-function phenotypic similarities measured in HeLa cells predict functional relationships in mouse genes. The enrichment ratio in the MouseNet Cellular Component Network was 1.45 but only marginally significant (Fisher’s test,  $P = 1.8 \times 10^{-2}$ ).

### 1.13 Data and software availability and performance

The complete data set, including the  $91356 \times 3$  microscopy images in TIFF format, intermediate image files, and RNAi library annotation are available from <http://www.ebi.ac.uk/huber-srv/cellmorph>.

The complete analysis was conducted using software built on the language and statistical environment R and its add-on packages from the CRAN ([www.r-project.org](http://www.r-project.org)) and Bioconductor ([www.bioconductor.org](http://www.bioconductor.org)) repositories. Our software is available for download from <http://www.ebi.ac.uk/huber-srv/cellmorph>. Among the main add-on packages used are: `EBImage` for the low-level image processing operations and for Ray Jones’ Voronoi segmentation on image manifolds [6] and `e1071` for the SVM classification with `libsvm` [3].

Computing the phenotypic profile of one perturbation from 4 input images took about 49 seconds (i.e. 12.3 seconds per image) on a single 2.6 GHz CPU with 2 GB of RAM, including calibration, cell segmentation, feature extraction and classification. The genome-wide screen (22839 perturbations) was processed in about 313 CPU hours; using a compute cluster of 30 CPUs, this corresponded to about 11 hours wall clock time.

## 2 References

### References

- [1] A. Arachchige Don, R. Dallapiazza, D. Bennin, T. Brake, C. Cowan, and M. Horne. Cyclin G2 is a centrosome-associated nucleocytoplasmic shuttling protein that influences microtubule stability and induces a p53-dependent cell cycle arrest. *Exp. Cell Res.*, 312:4181–4204, Dec 2006.
- [2] S. Beucher and F. Meyer. The morphological approach to segmentation: the watershed transformation. *Mathematical Morphology in Image Processing*, 1993.
- [3] C.-C. Chang and C.-J. Lin. *LIBSVM: a library for support vector machines*, 2001. Software available at <http://www.csie.ntu.edu.tw/~cjlin/libsvm>.
- [4] J. Ellson, E. Gansner, L. Koutsofios, S. C. North, and G. Woodhull. *Graph Drawing*, chapter Graphviz – Open Source Graph Drawing Tools. Lecture Notes in Computer Science. Springer Berlin / Heidelberg, 2002.
- [5] M.-K. Hu. Visual pattern recognition by moment invariants. *IEEE Transactions on Information Theory*, 8(2):179–187, February 1962.
- [6] T. R. Jones, A. E. Carpenter, and P. Golland. Voronoi-based segmentation of cells on image manifolds. In Y. Liu, T. Jiang, and C. Zhang, editors, *Proceedings of the ICCV Workshop on Computer Vision for Biomedical Image Applications (CVBIA)*, volume 3765 of *Lecture Notes in Computer Science*, pages 535–543, Berlin, 2005. Springer-Verlag.
- [7] W. Kim, C. Krumpelman, and E. Marcotte. Inferring mouse gene functions from genomic-scale data using a combined functional network/classification strategy. *Genome Biology*, 9:S5, June 2008.
- [8] L. Loo, L. Wu, and S. Altschuler. Image-based multivariate profiling of drug responses from single cells. *Nat. Methods*, 4:445–453, May 2007.
- [9] B. Neumann, M. Held, U. Liebel, H. Erfle, P. Rogers, R. Pepperkok, and J. Ellenberg. High-throughput RNAi screening by time-lapse imaging of live human cells. *Nat. Methods*, 3:385–390, May 2006.
- [10] I. D. R. M. Haralick, K. Shanmugam. Textural features for image classification. *IEEE Transactions on Systems, Man, and Cybernetics*, 3(6):610–621, November 1973.
- [11] B. Snel, G. Lehmann, P. Bork, and M. Huynen. STRING: a web-server to retrieve and display the repeatedly occurring neighbourhood of a gene. *Nucleic Acids Res.*, 28:3442–3444, Sep 2000.

- [12] M. R. Teague. Image analysis via the general theory of moments. *Journal of the Optical Society of America*, 70(8):920–930, 1979.
- [13] E. P. Xing, A. Y. Ng, M. I. Jordan, and S. Russell. Distance metric learning, with application to clustering with side-information. *Advances in Neural Information Processing Systems (MIT Press)*, 15:505–512, 2003.
- [14] J. Zhang, T. Chung, and K. Oldenburg. A Simple Statistical Parameter for Use in Evaluation and Validation of High Throughput Screening Assays. *J Biomol Screen*, 4:67–73, 1999.

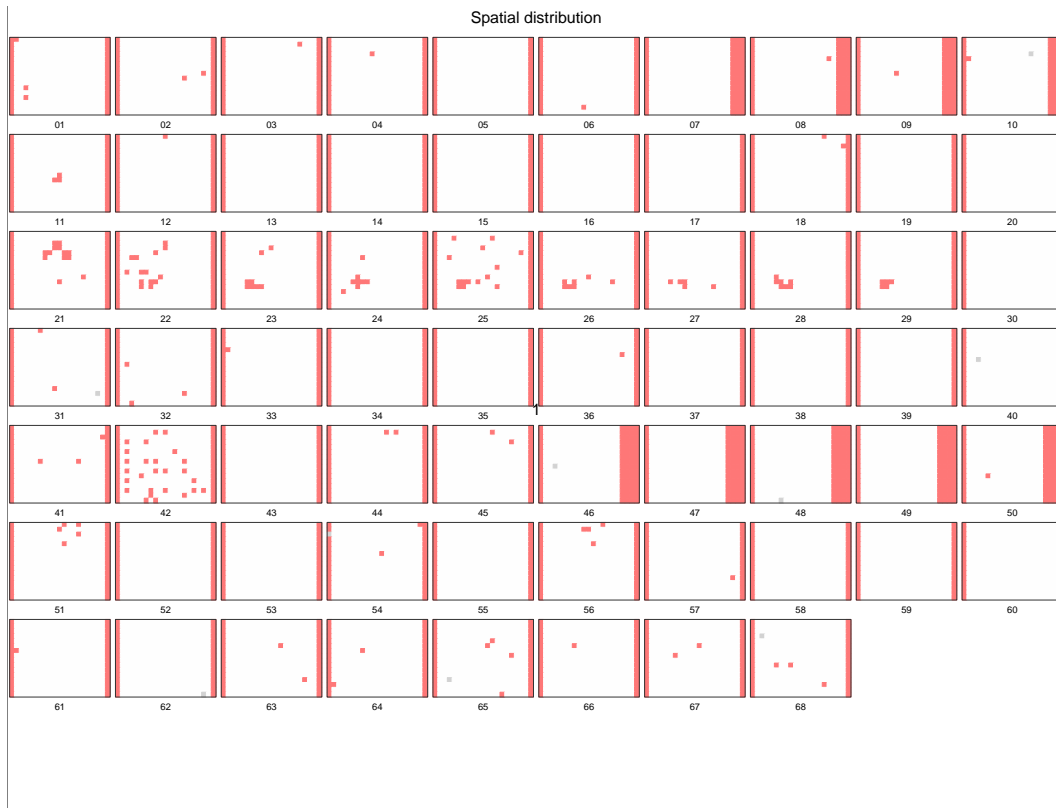

Figure 1: Quality control excluded wells. The figure shows, in red, the locations of all wells excluded from the analysis. Each of the 68 boxes corresponds to one of the 384 well plates, and shown are columns 4 (leftmost, marked in red throughout because it contained controls) to 24 (rightmost, marked in red throughout because it showed a pervasive edge effect), and all rows 1, . . . , 16. Further red marks correspond to sporadic wells in columns 5 to 23 that were discarded because of quality defects. In total, 1622 wells (7.1% of all wells) were discarded.

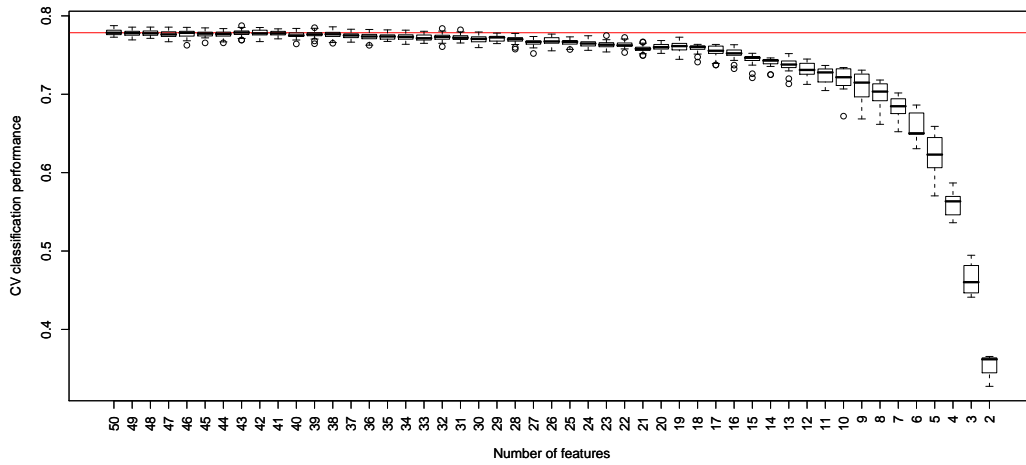

Figure 2: Influence of feature selection on cell classification performance. A greedy feature selection algorithm was applied, based on the estimated influence of features on the classification performance (see Section 1.6). The classification performance remained almost constant between 51 and 24 features with a constant and low variability.



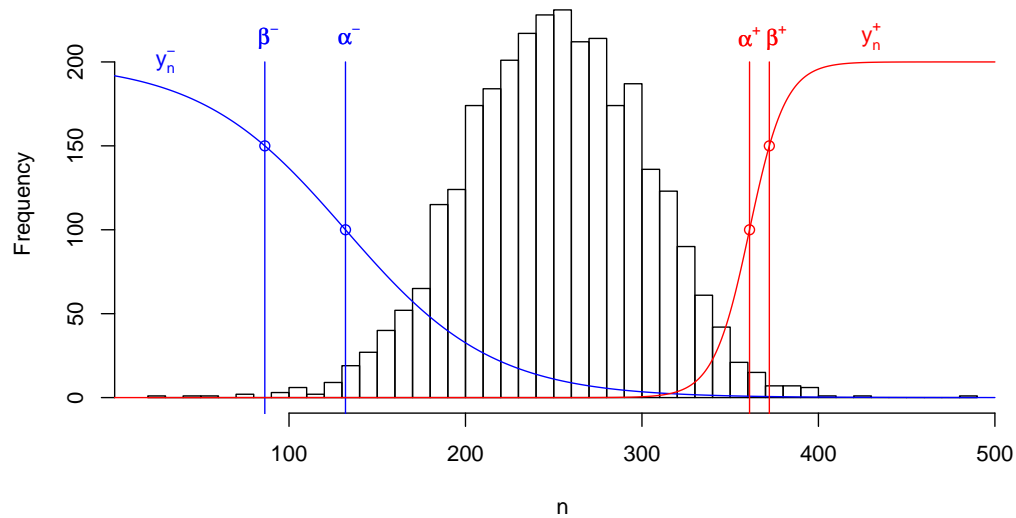

Figure 3: Sigmoid transformation. The histogram shows the 'number of cells' perturbation descriptor  $n$  from the plates of the second batch. The increase (red) and decrease (blue) transformation functions are shown, with their parameters  $(\alpha^+, \beta^+)$  and  $(\alpha^-, \beta^-)$ .

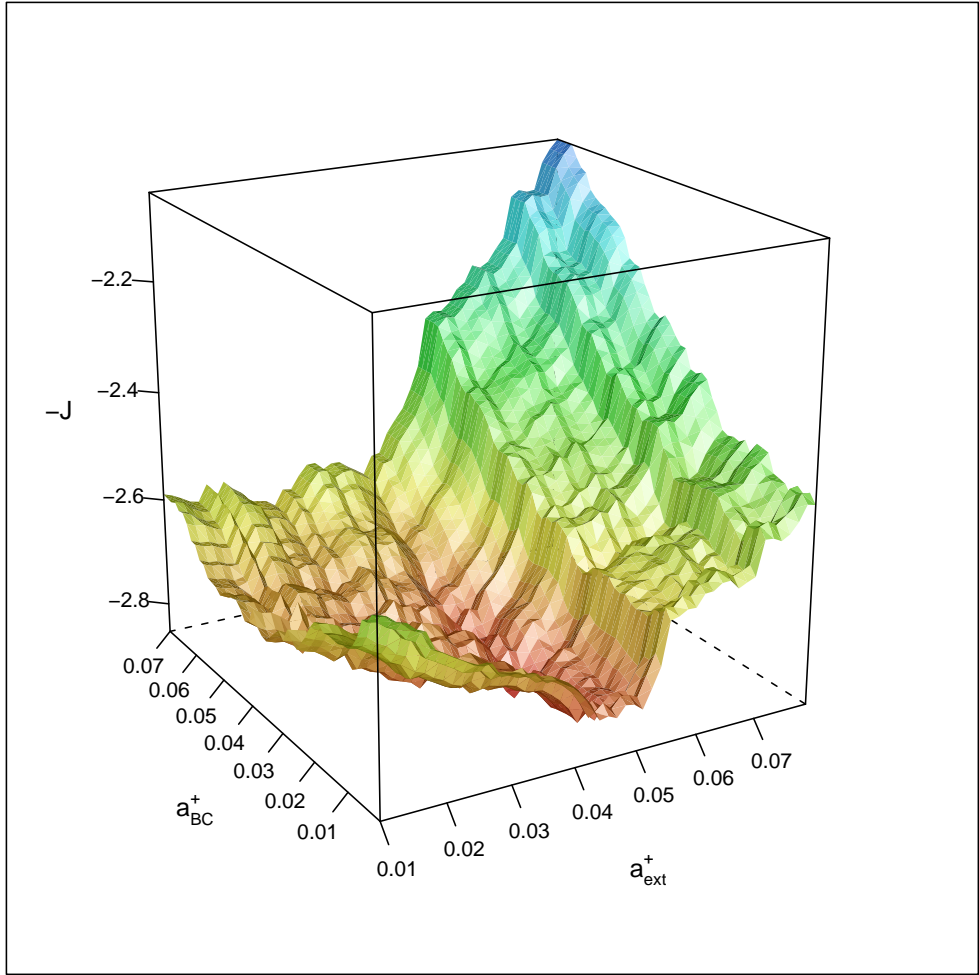

Figure 4: Distance metric learning optimization surface. The surface shows the criterion  $-J$  as a function of the two variables  $a_{ext}^+$  and  $a_{BC}^+$ , illustrating the roughness of the maximization surface. The maximum of  $J$  is located in the reddish bottom part of the surface.

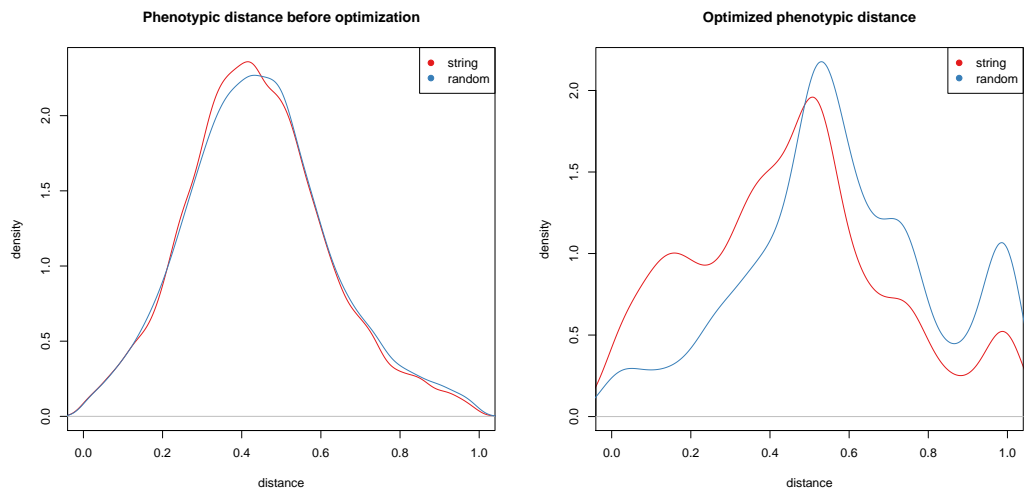

Figure 5: Distance distributions (STRING  $\mathcal{S}$  (red) and random  $\{\mathcal{R}_k\}_{1 \leq k \leq W}$  (blue)) before optimization (left), using the initial parameter values and after optimization (right), using the parameters of Table SVIII.

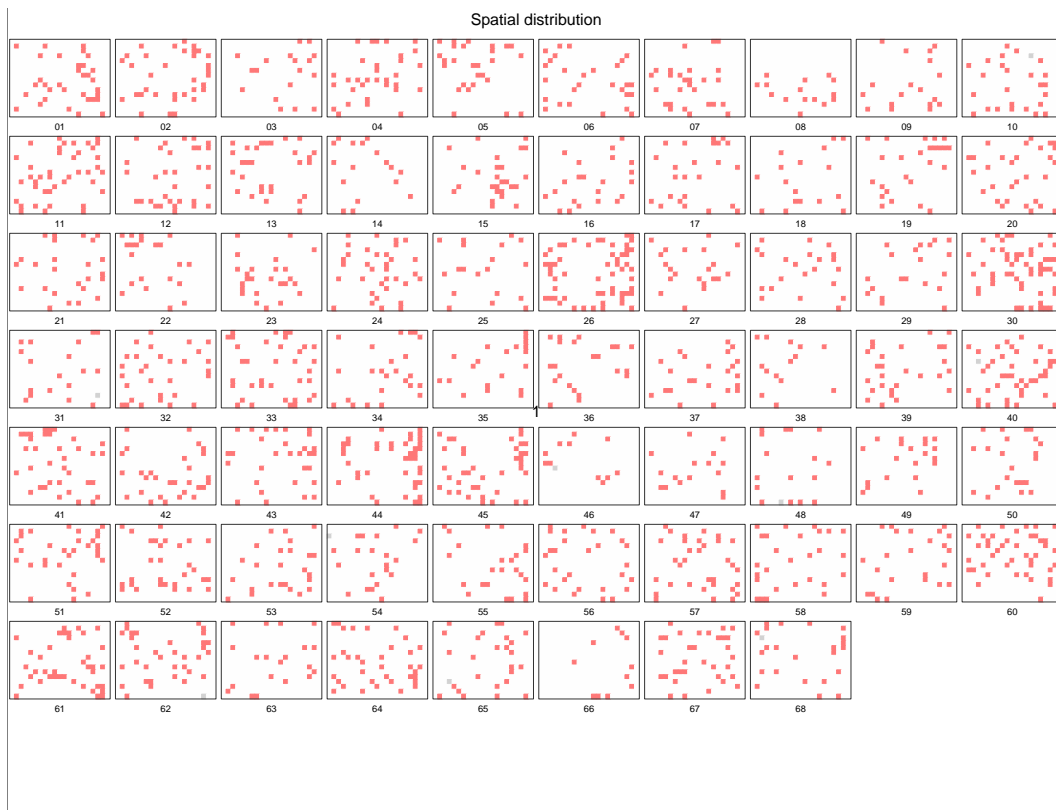

Figure 6: Distribution of hits (wells showing a non-wildtype phenoprint) over the 68 plates.

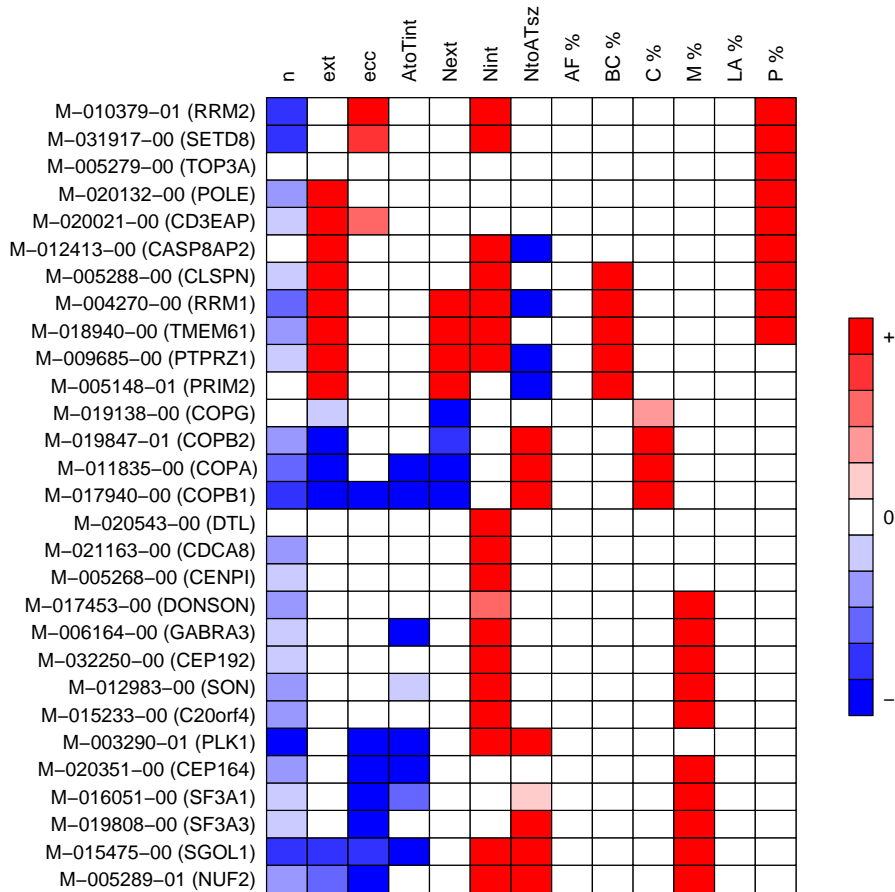

Figure 7: Heatmap of selected phenoprints. Shown are the values of phenoprints  $y_i$ , using the gene descriptors of Table SVII and the color code indicated on the right hand side (right: increase, blue: decrease).

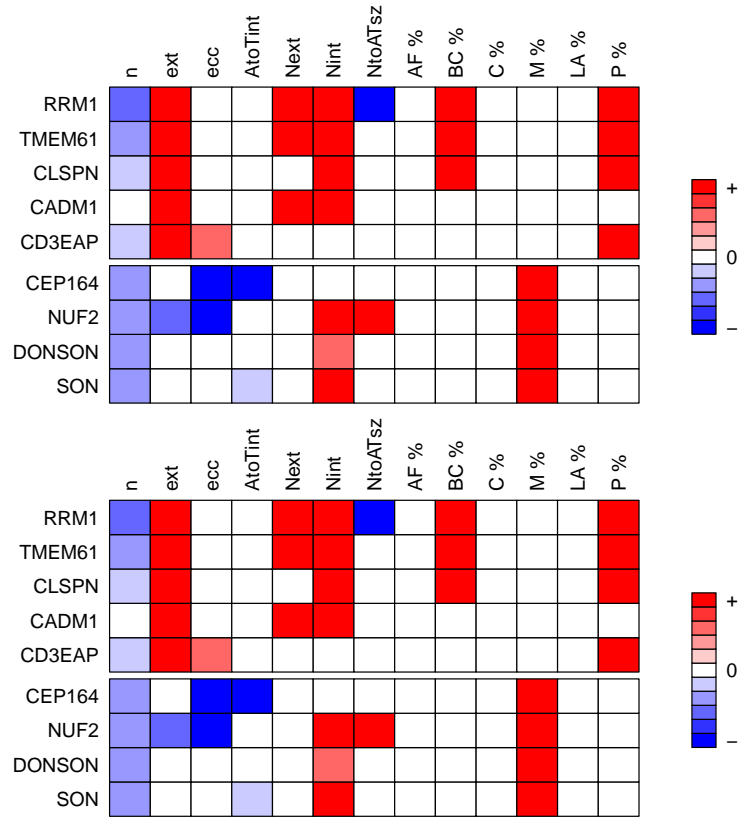

Figure 8: Leave-one-out experiment. Comparison of the original phenoprints (top) learned from STRING to phenoprints which have been learned, for each of them, from STRING where the corresponding gene has been removed (bottom). The phenoprints are similar with and without using the gene for learning the parameters.

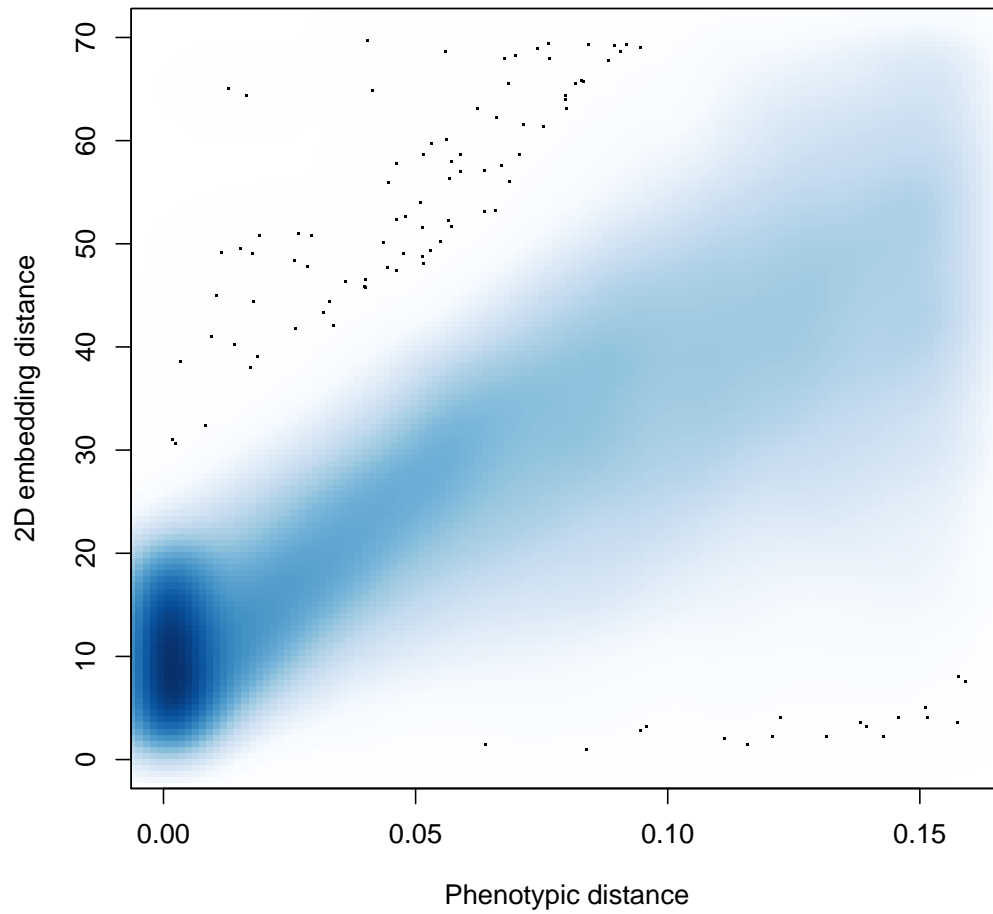

Figure 9: Scatter plot of the phenotypic distances, on the  $x$ -axis, against the distances in the 2D embedding.

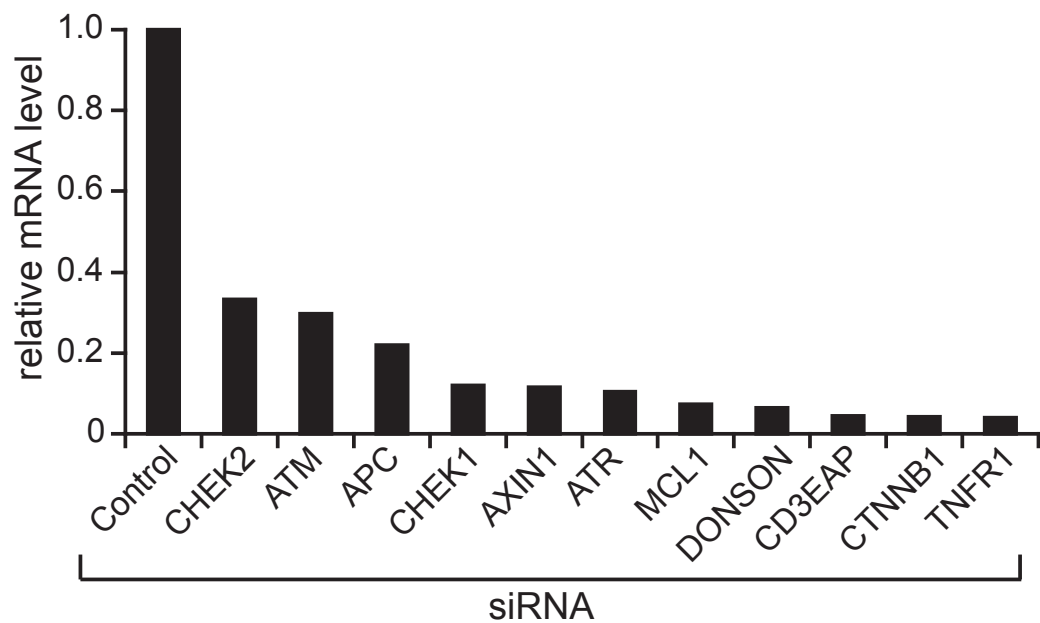

Figure 10: mRNA levels of exemplary genes are reduced under standard assay conditions to at least 65%. HeLa cells were transfected in 96-well format with indicated siRNA pools (Dharmacon, 20 nM final concentration) according to the standard high-throughput reverse transfection protocol described in the Methods section. Quantitative RT-PCR analysis was performed 48 h after siRNA transfection. GAPDH was used as internal negative control. Shown are representative knockdown efficiencies of perturbations yielding 95 to 65% decrease in mRNA levels.



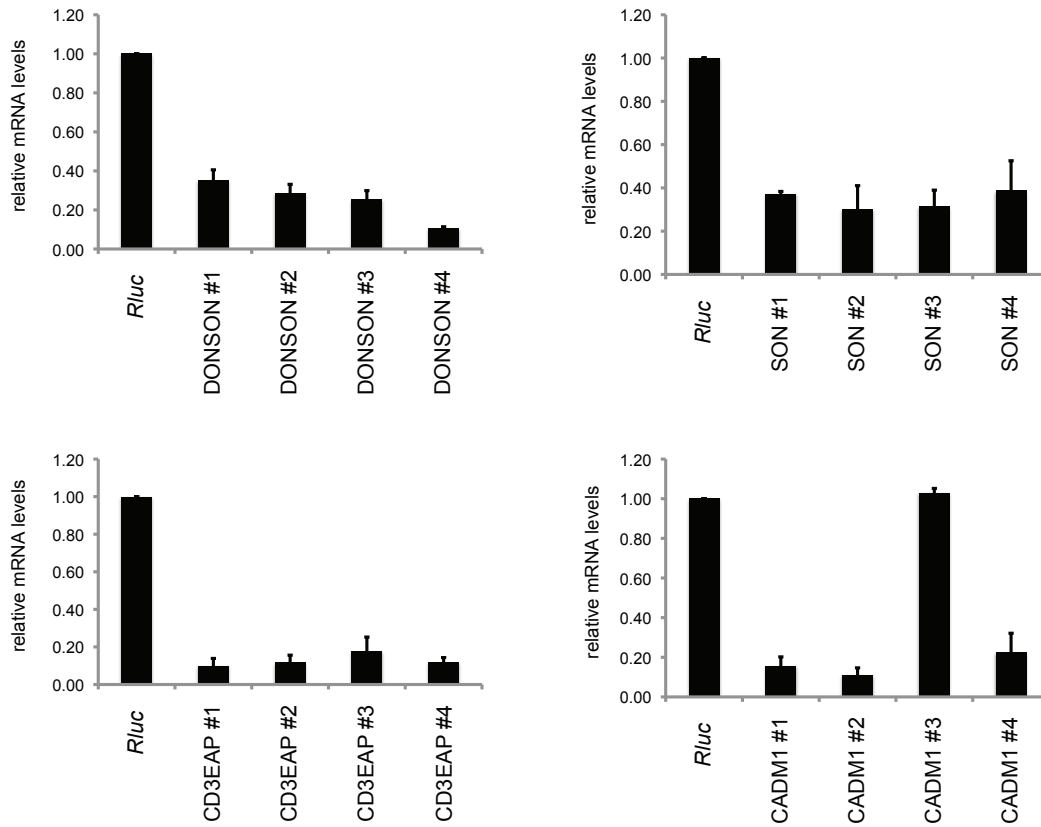

Figure 11: mRNA levels of candidate genes are reduced by single siRNAs. Quantitative RT-PCR analysis of mRNA levels 48 h after transfection with siRNAs. U2OS cells were transfected with the indicated single siRNAs (Dharmacon, 20 nM final concentration). GAPDH was used as internal control. Values are shown as mean  $\pm$  s.d. of three independent biological replicates.

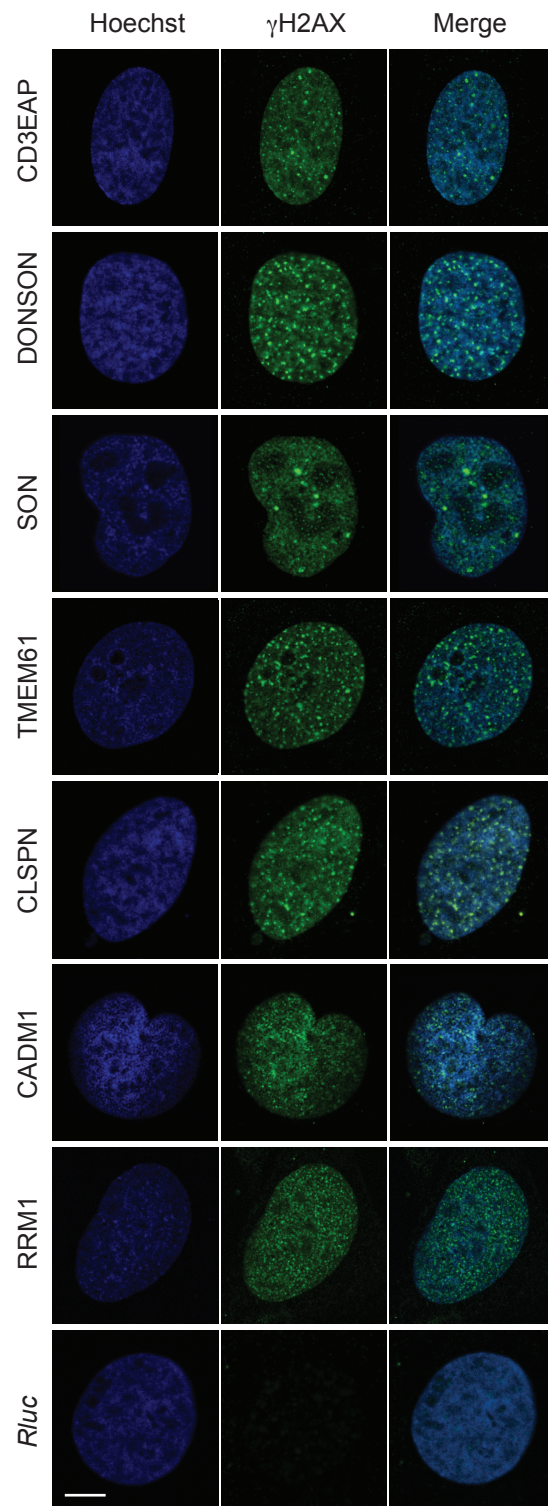

Figure 12: Knockdown of RRM1, CLSPN, CD3EAP, CADM1, TMEM61, DONSON and SON induces  $\gamma$ H2AX foci formation. U2OS cells were fixed with PFA, permeabilized and stained with primary mouse anti- $\gamma$ H2AX antibody and goat secondary anti-mouse Alexa 488 secondary antibody (green) 72 h after siRNA transfection. DNA is counterstained with Hoechst (blue). Scale bar represents 2.5  $\mu$ m.

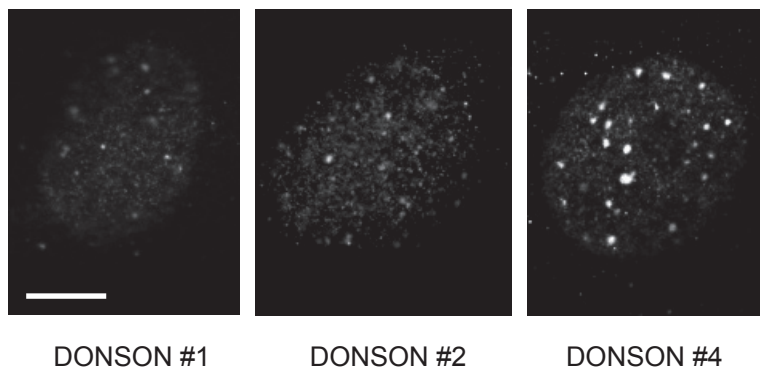

Figure 13:  $\gamma$ H2AX foci formation after DONSON knockdown correlates with the knockdown efficiency of the siRNA. U2OS cells were transfected with indicated siRNAs (Dharmacon, 20 nM final concentration). 72 h after siRNA transfection cells were fixed, permeabilized and immunostained with primary mouse anti- $\gamma$ H2AX antibody and goat secondary anti-mouse Alexa 488 secondary antibody. The results reflect a strong correlation between the silencing efficiency of the siRNA (Fig. S10) and the induced foci formation. The scale bar represents 2.5  $\mu$ m.

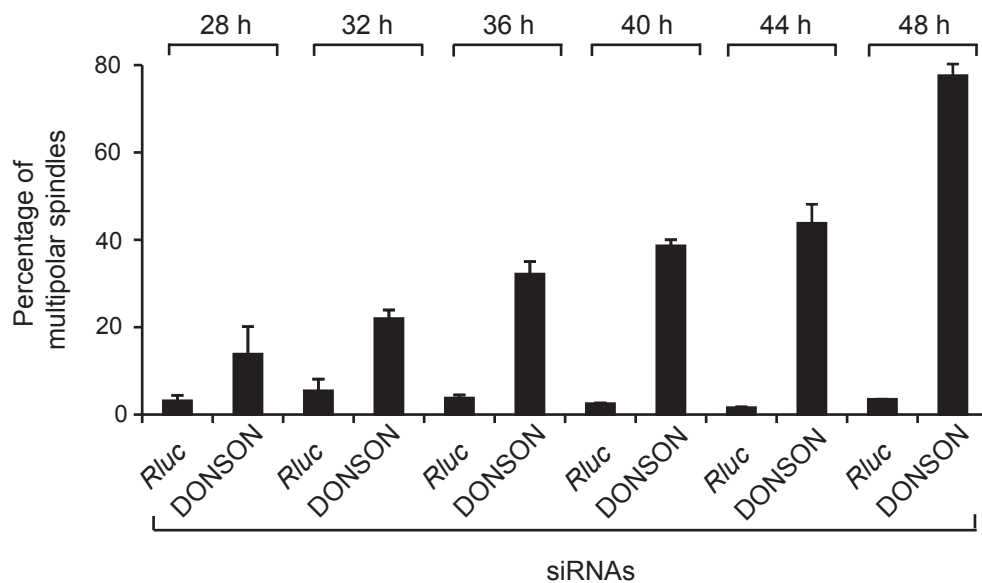

Figure 14: Prolonged DONSON knockdown in HeLa cells increases the amount of multipolar spindles. HeLa cells were transfected with a siRNA pool (Dharmacon, 20 nM final concentration) targeting DONSON. A pool targeting Renilla luciferase (*Rluc*) was used as internal negative control. Cells were fixed, permeabilized and immunostained at indicated time points. Cells were immunostained as described in Fig. 4d and metaphase spindles were analyzed. A total of 500 mitotic spindles were counted in each independent experiment in order to calculate the percentage of multipolar spindles within the total number of metaphase spindles. The results shown represent mean  $\pm$  s.d. from two independent experiments. In comparison to control conditions, prolonged DONSON depletion led to a 15 fold increase in the percentage of multipolar spindles.

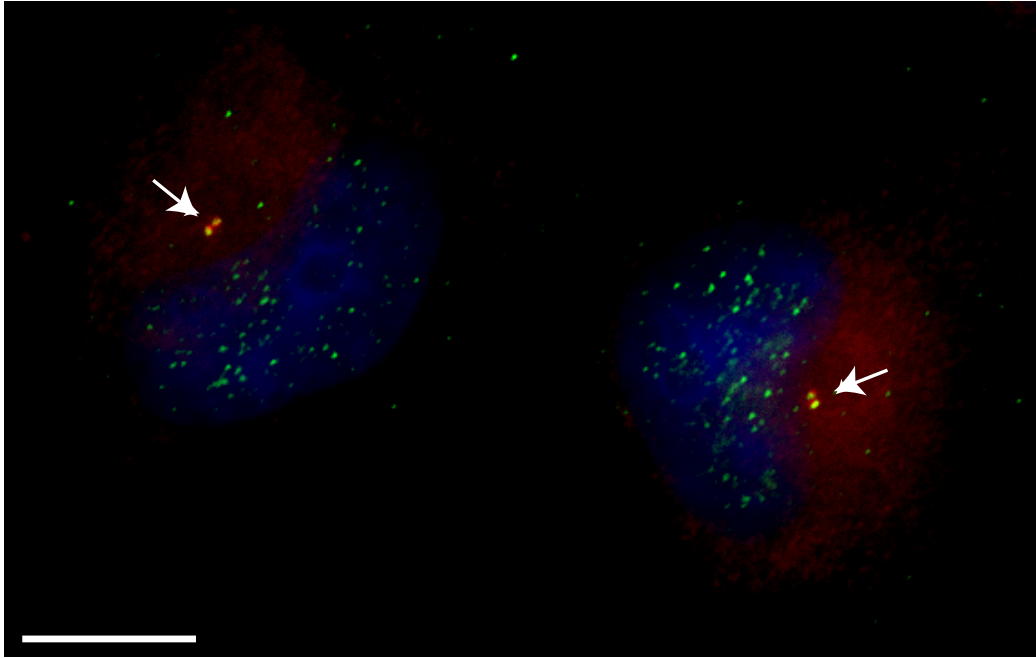

Figure 15: DONSON-HA partially overlaps with  $\gamma$ -Tubulin foci at centrosomes. HeLa cells were transfected with HA-tagged DONSON, fixed with methanol/acetone 24 h after transfection and immunostained. Immunostaining was performed using rabbit anti- $\gamma$ -Tubulin and mouse anti HA-tag, and goat anti-mouse Alexa 488 or goat anti-rabbit Alexa 594 secondary antibody, respectively. DONSON-HA staining (green) showed a prominent centrosomal staining as seen in Fig. 4e. DNA is counterstained with Hoechst (blue). Interestingly, colocalization analysis using  $\gamma$ -Tubulin specific antibody (red) revealed that a substantial amount of cells showed a colocalization pattern in which only one of the two centrioles, colocalizes with DONSON-HA staining. A similar localization pattern has been described for other centrosomal proteins such as cyclin G2 [1]. Scale bar represents 10  $\mu$ m.

| RT-PCR primers |                               |
|----------------|-------------------------------|
| Name           | Sequence                      |
| q-APC-for      | 5-acgcgcttactgtgaaacct-3      |
| q-APC-rev      | 5-ttcaacaggagctggcatt-3       |
| q-ATM1-for     | 5-ccaggcaggaatcattcag-3       |
| q-ATM1-rev     | 5-caatccttttaaatagacggaagaa-3 |
| q-ATR-for      | 5-cgctgaactgtacgtgaaa-3       |
| q-ATR-rev      | 5-caattagtgccctggtgaacac-3    |
| q-AXIN1-for    | 5-ggagctctccgagacagagac-3     |
| q-AXIN1-rev    | 5-acaacgatgctgtcacacg-3       |
| q-CD3EAP-for   | 5-gcagactttgccccagaat-3       |
| q-CD3EAP-rev   | 5-tgccaatttgcccttgac-3        |
| q-CHEK1-for    | 5-caggagagaaggcaatatccaa-3    |
| q-CHEK1-rev    | 5-gcatgcctatgtctggctct-3      |
| q-CHEK2-for    | 5-gccagagaatgttttactgtcatc-3  |
| q-CHEK2-rev    | 5-cttggagtgcccaaatcag-3       |
| q-CTNNB1-for   | 5-agctgaccagctctctctca-3      |
| q-CTNNB1-rev   | 5-ccaatatcaagccaagatcagc-3    |
| q-DONSON-for   | 5-gtccagcattgtagggcaac-3      |
| q-DONSON-rev   | 5-ggctctgctggaaggtacaa-3      |
| q-MCL1-for     | 5-aagccaatgggcaggtct-3        |
| q-MCL1-rev     | 5-tgtccagttccgaagcat-3        |
| q-TNFR1-for    | 5-gagaggccatagctgtctgg-3      |
| q-TNFR1-rev    | 5-gaggggtatattcccaccaac-3     |

| DONSON-HA PCR primers |                                                                             |
|-----------------------|-----------------------------------------------------------------------------|
| Name                  | Sequence                                                                    |
| DonHA-forw            | 5-cgctagcgcaccatggcctttcggtgc-3                                             |
| DonHA-rev             | 5-ccgaattcctaagcatagctctggacatcataagggtatccgccgatctccaattataaatgtagtctctc-3 |

Table I: RT-PCR primers and DONSON-HA PCR primers.

| Class | Description                            |
|-------|----------------------------------------|
| AF    | Actin fibres                           |
| BC    | Big (large) cells                      |
| C     | Condensed cells                        |
| D     | Debris                                 |
| LA    | Lamellipodia                           |
| M     | Metaphase                              |
| MB    | Membrane blebbing                      |
| N     | Normal cells                           |
| P     | Cells with protrusions and elongations |
| Z     | Telophase                              |

Table II: 10 cell classes were considered during the screen analysis. AF: actin fibers/stress fibers, BC: cells with increased nuclear and cytoplasmic size or flat/adherent cells with increased cell body, C: small and condensed cells, D: cellular debris, LA: lamellipodia or increased cortical actin, M: mitotic cells in pro-to metaphase, MB: apoptotic cells with membrane blebbing, N: wildtype cells, P: elongated cells or cells with protrusions, Z: telophase cells.

| AF  | BC  | C   | D   | LA  | M   | MB  | N   | P   | Z  |
|-----|-----|-----|-----|-----|-----|-----|-----|-----|----|
| 170 | 310 | 338 | 219 | 258 | 186 | 110 | 542 | 315 | 97 |

Table III: Training set sizes. Number of cells in the training set in each of the cell phenotype classes.



| AF   | BC   | C    | D    | LA   | M    | MB   | N    | P    | Z    |
|------|------|------|------|------|------|------|------|------|------|
| 0.79 | 0.82 | 0.83 | 0.93 | 0.79 | 0.85 | 0.82 | 0.87 | 0.77 | 0.86 |

Table IV: Classification accuracy. Class-specific prediction rates computed on the training set (in %).

|    | AF  | BC  | C   | D   | LA  | M   | MB | N   | P   | Z  |
|----|-----|-----|-----|-----|-----|-----|----|-----|-----|----|
| AF | 135 | 10  | 2   | 0   | 2   | 4   | 0  | 2   | 4   | 0  |
| BC | 20  | 255 | 11  | 1   | 1   | 5   | 0  | 9   | 16  | 0  |
| C  | 0   | 3   | 279 | 8   | 2   | 5   | 9  | 9   | 6   | 12 |
| D  | 0   | 1   | 3   | 203 | 0   | 0   | 0  | 1   | 1   | 0  |
| LA | 1   | 0   | 2   | 1   | 205 | 0   | 0  | 31  | 7   | 0  |
| M  | 0   | 5   | 6   | 1   | 0   | 159 | 0  | 3   | 6   | 0  |
| MB | 0   | 0   | 6   | 1   | 0   | 0   | 90 | 3   | 1   | 0  |
| N  | 10  | 23  | 15  | 2   | 46  | 3   | 7  | 469 | 27  | 0  |
| P  | 4   | 12  | 6   | 2   | 2   | 6   | 3  | 14  | 244 | 2  |
| Z  | 0   | 1   | 8   | 0   | 0   | 4   | 1  | 1   | 3   | 83 |

Table V: Confusion matrix of the predicted cell classes computed on the training set. Columns represent the real classes while rows are the predicted ones.

| AF   | BC   | C     | D    | LA   | M    | MB   | N     | P    | Z    |
|------|------|-------|------|------|------|------|-------|------|------|
| 6.62 | 5.57 | 15.11 | 4.25 | 3.93 | 1.87 | 1.66 | 53.99 | 5.28 | 1.74 |

Table VI: Distribution of the size of predicted cell classes (in %).

| Name    | Description                        | $\mathbf{y}$ |
|---------|------------------------------------|--------------|
| n       | Number of live cells               | +/-          |
| ext     | Median cell extension              | +/-          |
| ecc     | Median cell eccentricity           | +/-          |
| AtoTint | Median cell actin-to-tubulin ratio | +/-          |
| Next    | Median nucleus extension           | +/-          |
| Nint    | Median nucleus intensity           | +            |
| NtoATsz | Median nucleus-to-cell size ratio  | +/-          |
| AF %    | Fraction of Actin Fiber cells      | +            |
| BC %    | Fraction of Big Cells              | +            |
| C %     | Fraction of Condensed cells        | +            |
| LA %    | Fraction of Lamellipodia cells     | +            |
| M %     | Fraction of Metaphase cells        | +            |
| P %     | Fraction of Protusions cells       | +            |

Table VII: The perturbation phenotype descriptors and phenoprints. Each row corresponds to an element of the descriptor vector  $\mathbf{x}$ . The column  $\mathbf{y}$  describes whether the increase (+), the decrease (-) or both (+/-) of the descriptor value was considered in the phenoprint  $\mathbf{y}$ .

| Descriptor $k$ | $a_k^-$ | $b_k^-$ | $a_k^+$ | $b_k^+$ |
|----------------|---------|---------|---------|---------|
| n              | 2.00    | 0.19    | 0.54    | 0.51    |
| ext            | 0.62    | 0.20    | 0.73    | 0.70    |
| ecc            | 0.68    | 0.57    | 0.86    | 0.68    |
| AtoTint        | 0.46    | 0.31    | 0.72    | 0.71    |
| Next           | 0.71    | 0.40    | 0.61    | 0.59    |
| Nint           |         |         | 0.73    | 0.66    |
| NtoATsz        | 0.54    | 0.54    | 0.88    | 0.69    |
| AF             |         |         | 0.62    | 0.50    |
| BC             |         |         | 0.69    | 0.69    |
| M              |         |         | 0.65    | 0.60    |
| LA             |         |         | 0.58    | 0.52    |
| P              |         |         | 0.55    | 0.52    |
| C              |         |         | 0.37    | 0.33    |

Table VIII: Optimized parameters of the distance metric / sigmoid transformation (in %).

| ID | color | label                                 | center | radius | size |
|----|-------|---------------------------------------|--------|--------|------|
| 1  | ●     | BL phenotype                          | 51F06  | 2      | 49   |
| 2  | ●     | Bright nuclei                         | 42E06  | 1      | 33   |
| 3  | ●     | Large nuclei                          | 49D13  | 1      | 36   |
| 4  | ●     | Cells with protrusions                | 06G09  | 1      | 44   |
| 5  | ●     | Elongated cells                       | 24O13  | 1      | 91   |
| 6  | ●     | Elongated cells with protrusions      | 12N20  | 1      | 42   |
| 7  | ●     | SM phenotype                          | 19A10  | 3      | 36   |
| 8  | ●     | Small cells                           | 64F17  | 1      | 58   |
| 9  | ●     | Low eccentricity cells                | 68C05  | 1      | 60   |
| 10 | ●     | High actin ratio cells                | 26P23  | 1      | 91   |
| 11 | ●     | Metaphase cells                       | 68H13  | 1      | 81   |
| 12 | ●     | Actin fiber cells                     | 35H12  | 1      | 59   |
| 13 | ●     | Big cells                             | 43L11  | 1      | 51   |
| 14 | ●     | Large cells                           | 35G13  | 1      | 35   |
| 15 | ●     | Lamellipodia cells                    | 02L08  | 1      | 67   |
| 16 | ●     | Lamellipodia + high actin ratio cells | 01J11  | 1      | 31   |
| 17 | ●     | Proliferating cells                   | 38B05  | 1      | 100  |

Table IX: Cluster definition. Each cluster is defined by its center (well ID) and radius ( $k$ -th neighboring degree). The field 'size' indicates how many nodes are present in each cluster. Each cluster is rendered with a different color and is labelled according to its most representative phenoprint. The 'BL phenotype' is characterized by a decrease in the number of cells and increase of metaphase cells. The 'SM phenotype' shows an abundance of large cells with protrusions and bright nuclei.

| HGNC      | HeLa phenotype | U2OS phenotype | HeLa reproducibility | Qiagen reproducibility |
|-----------|----------------|----------------|----------------------|------------------------|
| AADACL1   | P,LA           | P,LA           |                      | X                      |
| ABCB10    | BC,Z,M         | BC,Z,M         | X                    | X                      |
| ACRC      | N,C,M          | N,C,M          |                      | X                      |
| ADAMTS18  | BC,P           | BC,P           | X                    | X                      |
| ADIPOR2   | N              | N              |                      | X                      |
| AFAP1     | P,C            | P,C            |                      | X                      |
| AGR2      | P,BC           | P,BC           |                      | X                      |
| AGXT2     | LA             | LA             | X                    | X                      |
| AMTN      | BC,C,M         | BC,C,M         |                      | X                      |
| ANAPC7    | N              | N              | X                    | X                      |
| ANLN      | BC,P,M         | BC,P,M         | X                    | X                      |
| AP4E1     | BC,LA          | BC,LA          |                      | X                      |
| APBB1IP   | C              | C              | X                    | X                      |
| ARCN1     | C              | C              | X                    | X                      |
| ARFGEF1   | P              | P              | X                    | X                      |
| ARHGAP1   | N,C            | N,C            |                      | X                      |
| ARHGAP20  | N              | N              |                      | X                      |
| ARHGEF4   | P              | BC             | X                    |                        |
| ARIH2     | C,LA           | N              |                      |                        |
| ASF1B     | P,M            | BC             |                      |                        |
| ASNSD1    | P,LA           | P,LA           | X                    | X                      |
| ASPH      | N,BC           | N,BC           | X                    | X                      |
| ATP1B3    | LA             | LA             |                      | X                      |
| ATP5G2    | BC,AF          | BC,AF          |                      | X                      |
| ATP7A     | BC,AF          | BC,AF          | X                    | X                      |
| B3GALNT1  | P,M            | P,M            |                      | X                      |
| BCAR3     | P,C            | P,C            | X                    | X                      |
| BCKDHA    | C,AF,P         | C,AF,P         |                      | X                      |
| BCL2L1    | N,BC,P         | N,BC,P         | X                    | X                      |
| BEX2      | BC,LA          | BC,LA          |                      | X                      |
| BIN3      | N              | N              |                      | X                      |
| BIRC5     | BC,AF          | BC,AF          |                      | X                      |
| BLR1      | P              | P              |                      | X                      |
| BRCC3     | N,M            | N,M            |                      | X                      |
| BRD9      | BC,P           | BC,P           | X                    | X                      |
| C10ORF116 | BC,AF,C        | BC,AF,C        |                      | X                      |
| C11ORF48  | AF,P           | AF,P           |                      | X                      |
| C11ORF61  | P,LA           | P,LA           |                      | X                      |
| C12ORF24  | P              | P              |                      | X                      |
| C12ORF59  | P,C,M          | P,C,M          |                      | X                      |
| C13ORF3   | C,M            | C,M            | X                    | X                      |
| C15ORF42  | BC,P           | BC,P           |                      | X                      |
| C16ORF68  | BC,AF          | BC,AF          | X                    | X                      |
| C1ORF177  | C              | C              |                      | X                      |
| C1QA      | BC,LA          | BC,LA          | X                    | X                      |
| C20ORF20  | BC,P           | BC,P           | X                    | X                      |
| C20ORF4   | C,M            | C,M            |                      | X                      |
| C2ORF60   | BC,C           | BC,C           | X                    | X                      |
| C4ORF18   | AF,C           | AF,C           |                      | X                      |
| C6ORF142  | C              | C              |                      | X                      |
| C6ORF182  | BC,P           | BC,P           | X                    | X                      |
| C6ORF204  | BC,P           | BC,P           |                      | X                      |
| C6ORF64   | P              | P              |                      | X                      |
| C9ORF90   | BC,C           | BC,C           |                      | X                      |
| CA14      | LA             | LA             |                      | X                      |
| CABLES1   | BC,AF          | BC,AF          |                      | X                      |
| CACNA1A   | P,C,M          | M              | X                    |                        |
| CACNA1F   | BC,P           | BC,P           |                      | X                      |
| CADM1     | BC,AF          | BC,AF          | X                    | X                      |
| CAPRIN1   | BC,AF          | BC,AF          | X                    | X                      |
| CARS      | N,BC           | N,BC           | X                    | X                      |
| CASP8AP2  | BC,P,AF        | BC,P,AF        | X                    | X                      |
| CBLC      | BC,AF          | C              |                      |                        |
| CCBE1     | P              | P              |                      | X                      |
| CCDC114   | AF             | AF             |                      | X                      |
| CCDC132   | BC,P,C         | BC,P,C         |                      | X                      |
| CCDC142   | BC             | BC             |                      | X                      |
| CCDC98    | BC,AF          | BC,AF          |                      | X                      |
| CD33      | P,M            | P,M            |                      | X                      |
| CD3EAP    | BC,P,AF,M      | BC,P,AF,M      | X                    | X                      |
| CDC37L1   | LA             | LA             | X                    | X                      |

|         |          |          |   |   |
|---------|----------|----------|---|---|
| CDC42   | P,C,D    | P,C,D    | X | X |
| CDC6    | BC       | BC       |   | X |
| CDCA5   | M,BC     | M,BC     | X | X |
| CDCA8   | BC,P,M   | BC,P,M   | X | X |
| CDH10   | AF       | AF       |   | X |
| CDKL1   | LA,BC,P  | LA,BC,P  |   | X |
| CDKN2A  | C,M      | C,M      | X | X |
| CEBPD   | BC,LA    | BC,LA    |   | X |
| CECR6   | BC,C     | BC,C     |   | X |
| CENPE   | BC,M     | BC,M     | X | X |
| CENPH   | N,M      | C        |   |   |
| CENPI   | BC,M,P   | BC,M,P   | X | X |
| CEP164  | AF       | P        |   |   |
| CEP192  | BC,M     | BC,M     | X | X |
| CFL1    | N        | N        | X | X |
| CGRRF1  | P,C,M    | P,C,M    | X | X |
| CHD4    | N        | P        |   |   |
| CHEK1   | M,BC     | M,BC     | X | X |
| CHIT1   | AF,C,M   | AF,C,M   |   | X |
| CHN1    | C,LA     | C,LA     | X | X |
| CHST12  | C,M      | C,M      | X | X |
| CHST5   | P,AF     | P,AF     | X | X |
| CKAP5   | M,P      | M,P      | X | X |
| CLDN11  | N,C      | N,C      | X | X |
| CLDN4   | LA,C     | LA,C     |   | X |
| CLIC2   | P,AF     | P,AF     |   | X |
| CLN8    | BC,AF    | BC,AF    | X | X |
| CLPS    | BC,LA    | BC,LA    |   | X |
| CLSPN   | BC,P,M,D | BC,P,M,D | X | X |
| CLTC    | N,C      | N,C      | X | X |
| CLU     | N,AF     | N,AF     |   | X |
| CLUAP1  | P,C,M    | P,C,M    | X | X |
| CNTFR   | P,C      | P,C      | X | X |
| COL20A1 | P,C      | BC       | X |   |
| COL9A3  | AF,C     | AF,C     | X | X |
| COPA    | C,M      | C,M      | X | X |
| COPB1   | M,D      | M,D      | X | X |
| COPB2   | C,M      | C,M      | X | X |
| COPE    | BC,P,C   | BC,P,C   |   | X |
| COPG    | C,D,P    | C,D,P    | X | X |
| COPZ1   | P,C      | P,C      | X | X |
| COPZ2   | P,C      | P,C      |   | X |
| CORO7   | BC,AF    | BC,AF    |   | X |
| COX6A2  | LA       | LA       | X | X |
| CPNE5   | AF,C     | AF,C     |   | X |
| CR2     | C,LA,P   | C,LA,P   | X | X |
| CRNKL1  | M,BC,LA  | M,BC,LA  | X | X |
| CSAD    | N,M      | P        |   |   |
| CSDC2   | BC,AF    | BC,AF    |   | X |
| CST5    | C        | N        |   |   |
| CTDSP1  | M,P      | M,P      |   | X |
| CTF1    | BC,AF    | BC,AF    |   | X |
| CTRC    | BC,AF    | BC,AF    |   | X |
| CUTA    | BC,AF    | BC,AF    |   | X |
| CXXC4   | BC,LA,P  | BC,LA,P  | X | X |
| CYBRD1  | BC,AF    | BC,AF    | X | X |
| CYP2B6  | BC,LA,M  | BC,LA,M  |   | X |
| CYR61   | C,N      | C,N      |   | X |
| DAB2    | N        | N        |   | X |
| DAND5   | C,M,P    | C,M,P    |   | X |
| DDX5    | P,C      | P,C      |   | X |
| DERL2   | N        | N        |   | X |
| DHX58   | LA       | LA       |   | X |
| DLG4    | N        | N        |   | X |
| DLG5    | P,LA,C   | P,LA,C   |   | X |
| DLL4    | P,AF     | BC       |   |   |
| DNAJB9  | LA       | LA       | X | X |
| DNASE1  | P,C      | BC       |   |   |
| DNMT1   | BC,AF    | BC,AF    |   | X |
| DONSON  | BC,C,M,P | BC,C,M,P | X | X |
| DQX1    | P,C      | P,C      |   | X |
| DSCAML1 | AF,M     | AF,M     |   | X |
| DSCR3   | BC,P     | BC,P     |   | X |



|          |          |          |   |   |
|----------|----------|----------|---|---|
| DTL      | P        | BC       | X |   |
| DUX1     | BC,AF    | BC,AF    | X | X |
| DYNC112  | P,M      | P,M      | X | X |
| DYSF     | AF,M     | AF,M     |   | X |
| ECOP     | BC,C     | BC,C     |   | X |
| EDC3     | LA       | LA       |   | X |
| EFEMP2   | P,LA     | AF       | X |   |
| EFHA2    | BC,LA    | BC,LA    |   | X |
| EI24     | BC,AF,C  | BC,AF,C  |   | X |
| EIF2B5   | P,BC     | P,BC     |   | X |
| EIF2S1   | AF       | AF       |   | X |
| EIF3C    | M,P      | M,P      | X | X |
| EIF3I    | AF,C     | AF,C     | X | X |
| EIF4A3   | M,C      | M,C      | X | X |
| ELAC2    | C,LA     | C,LA     | X | X |
| ELAVL4   | N,C      | N,C      |   | X |
| ELF3     | BC,AF    | BC,AF    |   | X |
| ELL3     | N,LA     | N,LA     | X | X |
| ELMO2    | P        | P        | X | X |
| ELMO3    | BC       | BC       |   | X |
| ENOSF1   | C        | C        |   | X |
| EPSTI1   | C,M,D    | C,M,D    | X | X |
| ERAF     | P,AF,C   | P,AF,C   | X | X |
| ESF1     | LA       | LA       | X | X |
| EXOSC8   | P,C      | P,C      |   | X |
| EZH1     | P,M      | P,M      |   | X |
| FAM107A  | P        | P        |   | X |
| FAM113A  | LA       | LA       |   | X |
| FAM12B   | BC       | BC       | X | X |
| FAM195B  | BC,LA    | BC,LA    | X | X |
| FAM69B   | P,LA,C   | P,LA,C   | X | X |
| FAM89B   | BC,LA    | C        |   |   |
| FANCB    | P,BC     | P,BC     |   | X |
| FASLG    | BC,AF    | BC,AF    |   | X |
| FBXL6    | BC,AF,C  | BC,AF,C  | X | X |
| FBXL7    | P,LA     | P,LA     |   | X |
| FBXO5    | BC,P     | BC,P     |   | X |
| FBXW8    | P,C      | P,C      |   | X |
| FGF22    | BC       | BC       | X | X |
| FGFRL1   | AF,BC    | AF,BC    | X | X |
| FIBIN    | BC       | BC       | X | X |
| FKBP1A   | BC,M     | BC,M     |   | X |
| FKBP2    | N,C      | P        |   |   |
| FLJ21075 | N        | N        |   | X |
| FMO5     | P,LA     | P,LA     |   | X |
| FNTB     | C,P      | N        | X |   |
| FOSL1    | BC,AF    | BC,AF    | X | X |
| FOSL2    | BC,AF    | BC,AF    | X | X |
| FUCA2    | N,C      | N,C      |   | X |
| FXYD1    | BC       | BC       |   | X |
| FZD2     | BC,P     | BC,P     | X | X |
| GABBR1   | C,LA     | AF       |   |   |
| GABRA3   | C,M      | C,M      | X | X |
| GABRG3   | P,M      | P,M      |   | X |
| GALNT4   | P,C      | P,C      |   | X |
| GAPDH    | C        | C        |   | X |
| GBA      | C,M,AF   | C,M,AF   |   | X |
| GCNT1    | AF       | AF       | X | X |
| GDF3     | AF,M     | AF,M     | X | X |
| GFM1     | LA,P     | LA,P     | X | X |
| GGTL3    | BC,C     | BC,C     |   | X |
| GIMAP5   | P,C      | P,C      | X | X |
| GLIS1    | C        | C        |   | X |
| GMEB1    | C,AF     | C,AF     |   | X |
| GNA12    | P,C,D    | P,C,D    | X | X |
| GNAI1    | BC,BC,AF | BC,BC,AF | X | X |
| GOLPH3L  | BC,P     | BC,P     | X | X |
| GORASP2  | BC,AF    | BC,AF    |   | X |
| GOSR1    | BC,LA    | BC,LA    |   | X |
| GOSR2    | C,M,LA   | C,M,LA   |   | X |
| GPR37    | P,C      | P,C      |   | X |
| GPR89A   | BC,LA    | BC,LA    | X | X |
| GRIA4    | C,M      | C,M      |   | X |

|           |         |         |   |   |
|-----------|---------|---------|---|---|
| GRINL1A   | N,LA    | N,LA    |   | X |
| GSPT1     | BC,AF   | BC,AF   |   | X |
| GTF3A     | C,LA    | C,LA    | X | X |
| GTF3C6    | N,LA    | N,LA    |   | X |
| GUCA2A    | BC,AF   | BC,AF   | X | X |
| GZMM      | N,LA    | N,LA    | X | X |
| HDAC1     | P,C,M   | P,C,M   | X | X |
| HEBP1     | P       | P       | X | X |
| HHIPL2    | N,C     | N,C     |   | X |
| HIPK2     | P       | P       | X | X |
| HIST1H2AE | N,C     | N,C     | X | X |
| HIST1H2BO | BC,AF   | BC,AF   | X | X |
| HLA-DQB2  | P,M     | P,M     | X | X |
| HN1       | P,C     | P,C     | X | X |
| HOXC5     | P       | P       |   | X |
| HP        | N,P     | N,P     |   | X |
| HSD17B10  | C       | C       |   | X |
| HSPA6     | BC,P    | BC,P    |   | X |
| HTRA2     | BC,C    | BC,C    | X | X |
| IER3IP1   | N,P     | N,P     |   | X |
| IGSF6     | BC,LA   | BC,LA   |   | X |
| IGSF9     | AF      | AF      |   | X |
| IL12A     | BC,C    | BC,C    |   | X |
| IL2RG     | AF      | AF      |   | X |
| INF2      | N,C,LA  | N,C,LA  | X | X |
| INPP4A    | BC,C    | BC,C    |   | X |
| INSIG1    | LA      | LA      |   | X |
| IRX4      | C,M     | C,M     |   | X |
| JMJD6     | BC      | BC      | X | X |
| KATNAL1   | BC,AF   | BC,AF   |   | X |
| KCND1     | P,M     | P,M     |   | X |
| KCNIP1    | P,M     | P,M     | X | X |
| KCNK10    | P,C     | P,C     |   | X |
| KCNK16    | N,LA    | N,LA    | X | X |
| KCNN3     | N,AF,M  | N,AF,M  | X | X |
| KCNT2     | P,C     | P,C     | X | X |
| KEAP1     | AF,C,M  | AF,C,M  | X | X |
| KERA      | BC,LA   | BC,LA   | X | X |
| KIAA0090  | C       | C       |   | X |
| KIAA0157  | C       | C       |   | X |
| KIAA1026  | BC,P,AF | BC,P,AF | X | X |
| KIAA1407  | P,C     | P,C     | X | X |
| KIAA1468  | LA      | LA      |   | X |
| KIAA1529  | BC,P    | BC,P    | X | X |
| KIAA1604  | M,C     | M,C     | X | X |
| KIAA1622  | P,C     | P,C     | X | X |
| KIAA1737  | N       | N       |   | X |
| KIAA1946  | P,AF    | P,AF    |   | X |
| KIF11     | M       | M       | X | X |
| KIF12     | BC,LA   | BC,LA   | X | X |
| KIF13A    | N,BC    | N,BC    | X | X |
| KIF15     | P,LA    | P,LA    | X | X |
| KIF20A    | LA      | LA      | X | X |
| KIF23     | BC,BC   | BC,BC   | X | X |
| KIF3A     | C       | C       |   | X |
| KLHDC2    | BC      | BC      |   | X |
| KLK1      | N,LA    | N,LA    | X | X |
| KPNB1     | P,M     | P,M     |   | X |
| KRIT1     | P,C     | P,C     |   | X |
| KSR1      | AF,LA   | AF,LA   |   | X |
| KY        | BC,P,AF | BC,P,AF |   | X |
| LEPROT    | BC,C    | BC,C    | X | X |
| LG12      | C,M     | C,M     |   | X |
| LIF       | P       | P       |   | X |
| LIG4      | P,M     | N       | X |   |
| LILRB1    | BC,LA   | BC,LA   | X | X |
| LILRB2    | AF,BC   | AF,BC   |   | X |
| LIN7C     | N,C     | N,C     |   | X |
| LSR       | C,LA    | C,LA    |   | X |
| MAGEB1    | BC,AF   | BC,AF   |   | X |
| MAGED1    | N       | N       | X | X |
| MAGEE1    | BC,AF   | BC,AF   | X | X |
| MAGEE2    | P,LA    | P,LA    | X | X |

|          |         |         |   |   |
|----------|---------|---------|---|---|
| MAGEH1   | LA      | LA      | X | X |
| MAGI1    | BC,AF   | BC,AF   | X | X |
| MARCH7   | N,P     | N,P     |   | X |
| MAST1    | P       | P       | X | X |
| MAX      | BC,LA   | BC,LA   | X | X |
| MC1R     | BC,LA   | BC,LA   | X | X |
| MCM10    | P,M     | N       |   |   |
| METTL1   | BC,AF   | BC,AF   |   | X |
| MFAP1    | BC,M,D  | BC,M,D  | X | X |
| MFAP3    | LA,P    | LA,P    |   | X |
| MFSD4    | BC,AF   | BC,AF   |   | X |
| MGAT2    | BC,AF   | BC,AF   |   | X |
| MGAT5    | BC      | BC      | X | X |
| MGC29891 | C,P     | C,P     | X | X |
| MIA      | BC,AF,C | BC,AF,C |   | X |
| MID1IP1  | P,LA    | P,LA    | X | X |
| MLN      | BC,AF   | BC,AF   | X | X |
| MSL3L1   | BC,AF   | BC,AF   | X | X |
| MSN      | AF,M    | AF,M    |   | X |
| MSTN     | BC,AF   | BC,AF   | X | X |
| MT3      | BC,AF   | BC,AF   | X | X |
| MYH9     | P,BC    | P,BC    | X | X |
| NACA     | BC      | C       |   |   |
| NAGA     | N       | N       |   | X |
| NANOG    | LA,C    | LA,C    |   | X |
| NANS     | AF,C    | AF,C    | X | X |
| NCOA5    | C,M     | AF      | X |   |
| NCR1     | C,LA,P  | C,LA,P  | X | X |
| NCR3     | BC,AF   | BC,AF   |   | X |
| NDC80    | M,BC    | M,BC    | X | X |
| NDE1     | P,C     | P,C     |   | X |
| NDOR1    | P,C     | P,C     |   | X |
| NDUFA7   | P,BC    | P,BC    | X | X |
| NEDD4    | M,AF    | M,AF    | X | X |
| NEDD8    | BC,AF   | BC,AF   | X | X |
| NFIA     | C,P     | C,P     | X | X |
| NGFR     | P,C,LA  | P,C,LA  | X | X |
| NHP2L1   | BC,D    | BC,D    | X | X |
| NINJ2    | N,P     | N,P     | X | X |
| NKD2     | P,LA    | P,LA    | X | X |
| NLRP9    | BC      | BC      |   | X |
| NNT      | LA,C    | LA,C    |   | X |
| NOL1     | C,BC    | C,BC    |   | X |
| NONO     | BC,LA   | BC,LA   |   | X |
| NOS3     | P,C     | P,C     | X | X |
| NOTUM    | C,BC    | C,BC    |   | X |
| NOX4     | P       | P       | X | X |
| NPFRR2   | P,C     | C       |   |   |
| NPHS1    | C,LA    | C,LA    |   | X |
| NR2F6    | P       | P       | X | X |
| NR3C1    | BC,M    | BC,M    |   | X |
| NR4A3    | BC,AF   | BC,AF   |   | X |
| NRN1     | LA      | LA      |   | X |
| NSUN4    | P,LA    | P,LA    | X | X |
| NUAK2    | N,BC    | N,BC    |   | X |
| NUCB1    | P,C     | P,C     | X | X |
| NUF2     | M       | M       | X | X |
| NUMA1    | BC,P    | BC,P    |   | X |
| NUMBL    | BC,AF   | BC,AF   | X | X |
| NUP205   | P       | BC      | X |   |
| NXF1     | BC,LA,D | BC,LA,D | X | X |
| NXF5     | P,M     | P,M     |   | X |
| OFCC1    | P,C     | P,C     |   | X |
| OPCML    | P,AF,C  | BC      | X |   |
| OPTN     | N,P     | N,P     |   | X |
| OR2F1    | P,D     | P,D     |   | X |
| OR5B3    | BC,AF   | BC,AF   |   | X |
| OR8K1    | C,LA    | C,LA    |   | X |
| ORC4L    | BC,P    | BC,P    | X | X |
| OVOL1    | N,BC,AF | N,BC,AF |   | X |
| PAX2     | P,LA    | P,LA    | X | X |
| PCBD1    | N       | N       |   | X |
| PCDH24   | BC,AF,C | BC,AF,C |   | X |

|          |          |          |   |   |
|----------|----------|----------|---|---|
| PCDHB10  | BC       | BC       | X | X |
| PCDHB7   | C        | C        | X | X |
| PCDHB9   | LA,C     | LA,C     | X | X |
| PDCD1LG2 | P        | N        | X |   |
| PDE4DIP  | BC,AF    | BC,AF    | X | X |
| PDYN     | P,C      | P,C      |   | X |
| PEG3     | BC,AF    | BC,AF    | X | X |
| PEX11A   | BC,LA    | BC,LA    | X | X |
| PEX13    | BC,AF    | BC,AF    | X | X |
| PEX26    | BC,LA,P  | BC,LA,P  | X | X |
| PGLYRP2  | N,C      | N,C      | X | X |
| PGLYRP3  | P,C      | C        |   | X |
| PHCA     | BC,AF    | BC,AF    | X | X |
| PHF11    | BC,LA    | BC,LA    |   | X |
| PIK3R4   | P,C      | P,C      | X | X |
| PIP5K1C  | BC,LA    | BC,LA    |   | X |
| PKIB     | C,M      | C,M      | X | X |
| PLAUR    | N,P      | N,P      |   | X |
| PLEK     | P,C      | C        | X |   |
| PLK1     | M        | M        | X | X |
| PLXNA2   | BC,P     | BC,P     |   | X |
| PLXNB1   | P,LA     | BC       | X |   |
| PMVK     | P        | P        |   | X |
| PNMAL1   | C,P      | C,P      | X | X |
| POLE     | BC,LA    | BC,LA    | X | X |
| POLH     | AF,C     | AF,C     |   | X |
| POLR2A   | M,D      | M,D      | X | X |
| POLR2E   | BC,AF,C  | BC,AF,C  |   | X |
| POLR2F   | BC,AF    | BC,AF    | X | X |
| POLR2L   | BC,P,C   | N        |   |   |
| POP1     | C,P      | C,P      | X | X |
| PPCDC    | LA       | LA       |   | X |
| PPP1R16A | P,C      | P,C      | X | X |
| PPP2R5E  | N        | N        |   | X |
| PQBP1    | N,C      | N,C      | X | X |
| PRC1     | LA,C     | LA,C     |   | X |
| PRDM8    | P,LA     | P,LA     | X | X |
| PRELP    | P,LA     | P,LA     |   | X |
| PRKAB1   | P,C      | P,C      |   | X |
| PRKAG2   | BC       | BC       |   | X |
| PRRX2    | BC,P     | C        | X |   |
| PRSS22   | BC,LA    | BC,LA    |   | X |
| PSMA6    | C,M      | C,M      |   | X |
| PSMD1    | P,C      | P,C      | X | X |
| PSMD3    | M        | M        | X | X |
| PSMD8    | M,C      | M,C      | X | X |
| PTDSS2   | P,AF     | BC       | X |   |
| PTGES    | BC,P,C   | BC,P,C   | X | X |
| PTPN13   | C,BC,AF  | C,BC,AF  | X | X |
| PTPN20B  | P        | P        |   | X |
| PTPRE    | BC       | BC       | X | X |
| PTRH2    | C,M,BC   | C,M,BC   |   | X |
| PUM1     | AF,BC    | AF,BC    |   | X |
| PVRL3    | N,BC     | N,BC     | X | X |
| PXMP2    | LA       | LA       |   | X |
| PZP      | BC,P     | BC,P     |   | X |
| RAB17    | BC,LA    | BC,LA    |   | X |
| RAB1B    | BC,AF    | BC,AF    |   | X |
| RAB3D    | P,M      | P,M      | X | X |
| RAD51    | P,BC,AF  | P,BC,AF  | X | X |
| RAD51C   | BC       | BC       |   | X |
| RAN      | BC,AF,LA | BC,AF,LA |   | X |
| RAP2C    | AF,BC    | AF,BC    | X | X |
| RAPH1    | BC,AF    | BC,AF    | X | X |
| RASA1    | P        | P        |   | X |
| RBBP9    | C,M      | C,M      | X | X |
| RBM8A    | M,D      | M,D      | X | X |
| RBP1     | C        | C        |   | X |
| RCN3     | C,M      | C,M      |   | X |
| RFWD2    | BC       | BC       |   | X |
| RHBG     | P        | P        |   | X |
| RHOJ     | C,M      | N        | X |   |
| RIC8B    | N,P      | N,P      | X | X |

|          |         |         |   |   |
|----------|---------|---------|---|---|
| RND3     | P,C     | P,C     | X | X |
| RPA1     | P,M     | P,M     | X | X |
| RPA2     | C,P     | C,P     | X | X |
| RPA3     | M,C     | M,C     | X | X |
| RPH3AL   | BC,LA   | BC,LA   | X | X |
| RPL10L   | BC,LA   | BC,LA   | X | X |
| RPL14    | BC      | BC      | X | X |
| RPL18    | C,BC    | C,BC    | X | X |
| RPL24    | BC,C    | BC,C    | X | X |
| RPL28    | BC,M    | BC,M    | X | X |
| RPL30    | C,BC,AF | C,BC,AF | X | X |
| RPL34    | BC,C    | BC,C    | X | X |
| RPL35    | BC,AF   | BC,AF   | X | X |
| RPL35A   | BC      | C       | X |   |
| RPL38    | C       | C       | X | X |
| RPL39L   | BC,P    | BC,P    | X | X |
| RPL4     | BC,C    | BC,C    | X | X |
| RPL7A    | BC,AF,C | BC,AF,C | X | X |
| RPL8     | C       | C       | X | X |
| RPLP0    | BC,AF   | BC,AF   | X | X |
| RPLP1    | C,BC    | C,BC    | X | X |
| RPS11    | C       | C       | X | X |
| RPS13    | C,M     | C,M     | X | X |
| RPS14    | C       | C       |   | X |
| RPS19    | C       | C       | X | X |
| RPS21    | C,BC    | C,BC    | X | X |
| RPS24    | C       | C       | X | X |
| RPS28    | C       | C       | X | X |
| RPS29    | C       | C       | X | X |
| RPS3A    | C       | C       | X | X |
| RPS5     | C,BC    | C,BC    | X | X |
| RPS9     | C,BC    | C,BC    | X | X |
| RPSA     | C,P     | C,P     | X | X |
| RSC1A1   | N,BC    | N,BC    | X | X |
| RTN1     | LA,AF   | C       | X |   |
| RUNDC2A  | BC,LA   | BC,LA   |   | X |
| RUVBL2   | P,D     | P,D     | X | X |
| SBNO1    | P       | N       | X |   |
| SC65     | BC      | BC      | X | X |
| SCGB1A1  | C,P     | C,P     | X | X |
| SEC24D   | P,LA    | P,LA    |   | X |
| SEMA6A   | LA      | LA      |   | X |
| SERINC1  | BC,LA   | BC,LA   |   | X |
| SESN3    | P,LA    | P,LA    | X | X |
| SETD8    | P       | P       | X | X |
| SF3A3    | C,M     | C,M     | X | X |
| SF3B1    | P,M,D   | P,M,D   | X | X |
| SF3B14   | BC,M    | BC,M    | X | X |
| SF3B4    | M,D     | M,D     | X | X |
| SH2B2    | P       | BC      | X |   |
| SHCBP1   | N,LA    | N,LA    | X | X |
| SHH      | AF,C    | C       | X |   |
| SHROOM2  | AF      | AF      | X | X |
| SLC25A17 | BC      | BC      |   | X |
| SLC26A1  | BC,AF   | BC,AF   | X | X |
| SLC2A13  | BC,AF   | BC,AF   | X | X |
| SLC39A1  | LA      | LA      |   | X |
| SLC39A2  | C,P     | C,P     | X | X |
| SLC3A2   | P,C     | P,C     | X | X |
| SLC45A2  | BC,P    | BC,P    | X | X |
| SLC46A1  | N,C     | N,C     |   | X |
| SLC46A2  | BC,AF   | BC,AF   |   | X |
| SLC4A2   | LA      | LA      |   | X |
| SLC6A4   | N       | BC      | X |   |
| SLITRK3  | P,C     | P,C     |   | X |
| SMARCD1  | P,LA    | N       | X |   |
| SMU1     | M,BC    | M,BC    | X | X |
| SMUG1    | C,AF    | BC      | X |   |
| SMURF1   | BC      | BC      | X | X |
| SOCS2    | P,C,D   | P,C,D   |   | X |
| SOCS7    | C,LA    | C,LA    | X | X |
| SOLH     | BC,M    | BC,M    | X | X |
| SON      | M,BC    | M,BC    | X | X |

|          |         |         |   |   |
|----------|---------|---------|---|---|
| SPATA20  | BC,AF   | P       | X |   |
| SPATA7   | N       | N       |   | X |
| SPIC     | P       | P       | X | X |
| SPIN2A   | BC,AF   | BC,AF   | X | X |
| SPP2     | P       | P       | X | X |
| SPRY2    | LA,BC   | LA,BC   |   | X |
| SPSB3    | BC,AF   | BC,AF   |   | X |
| SPTA1    | P       | P       | X | X |
| SSBP3    | BC,C    | BC,C    |   | X |
| STAP1    | C       | C       |   | X |
| STAR     | BC,LA   | BC,LA   |   | X |
| STK39    | P,C     | N       | X |   |
| STRA6    | P,C     | P,C     |   | X |
| SUPT6H   | P,C     | P,C     | X | X |
| SUV39H1  | M,AF    | M,AF    |   | X |
| SYT4     | P,C     | C       |   |   |
| SYTL2    | P,C     | P,C     | X | X |
| TAGLN    | P,C     | P,C     | X | X |
| TAS2R49  | M,BC    | M,BC    |   | X |
| TBX21    | BC,LA   | BC,LA   |   | X |
| TENC1    | N       | N       |   | X |
| TESK2    | LA      | LA      |   | X |
| THAP3    | BC,AF   | BC,AF   |   | X |
| THRA     | BC,LA,M | BC,LA,M |   | X |
| THSD3    | BC,P    | BC,P    |   | X |
| TIMM10   | BC,LA   | BC,LA   |   | X |
| TLN1     | P,C     | P,C     | X | X |
| TMBIM4   | P,C,M   | P,C,M   | X | X |
| TMEM61   | BC,P,AF | BC,P,AF | X | X |
| TMOD1    | C       | C       | X | X |
| TMOD2    | N       | N       |   | X |
| TMPRSS9  | N,BC    | N,BC    | X | X |
| TNFRSF1A | AF      | AF      | X | X |
| TNPO2    | P,M,C   | P,M,C   | X | X |
| TP53BP1  | P,AF    | N       | X |   |
| TP53I13  | BC,M    | BC,M    |   | X |
| TPCN1    | BC,AF   | BC,AF   |   | X |
| TPPP2    | C       | C       |   | X |
| TPRG1    | C,LA    | C,LA    |   | X |
| TPX2     | M,P     | M,P     | X | X |
| TRA2A    | N       | N       |   | X |
| TRAIP    | P,C     | P,C     | X | X |
| TRAPPC1  | P       | P       |   | X |
| TRAPPC2L | BC,AF   | BC,AF   |   | X |
| TRAT1    | LA,C    | C       |   |   |
| TRIM17   | P,C     | P,C     | X | X |
| TRIM32   | C       | C       |   | X |
| TRIM9    | LA,AF   | LA,AF   | X | X |
| TRPM8    | BC,AF   | BC,AF   | X | X |
| TSPAN9   | C       | C       | X | X |
| TTC22    | LA      | LA      |   | X |
| TUBE1    | P       | P       | X | X |
| UBB      | AF,BC   | AF,BC   |   | X |
| UBC      | LA,BC,M | LA,BC,M |   | X |
| UBE2D2   | C,M     | C,M     | X | X |
| UBOX5    | BC,AF,C | BC,AF,C | X | X |
| UGCGL1   | N,C,M   | N,C,M   |   | X |
| UNC93A   | BC,AF   | BC,AF   |   | X |
| UNG      | N       | N       |   | X |
| UPK1A    | M,AF    | M,AF    |   | X |
| USO1     | BC      | BC      |   | X |
| USP1     | C,LA    | C,LA    | X | X |
| USP18    | BC,P    | BC,P    | X | X |
| VAR52    | N,C,LA  | N,C,LA  |   | X |
| VAX1     | AF,C    | AF,C    | X | X |
| VIT      | C,LA    | C,LA    |   | X |
| VNN3     | C,AF    | C,AF    |   | X |
| WBSCR22  | LA,P    | LA,P    | X | X |
| WDHD1    | LA,P    | C       | X |   |
| WDR21A   | BC,AF,C | BC,AF,C |   | X |
| WEE1     | M,D     | M,D     | X | X |
| WFS1     | P,C,M   | P,C,M   |   | X |
| WHSC1L1  | M,P,LA  | M,P,LA  | X | X |

|         |          |          |   |   |
|---------|----------|----------|---|---|
| WIP1    | BC       | BC       |   | X |
| WISP1   | P,C      | P,C      |   | X |
| WRN     | C,M      | C,M      |   | X |
| WWP2    | P,C,M    | C        | X |   |
| YARS    | BC       | C        | X |   |
| YIPF4   | BC,AF,LA | BC,AF,LA |   | X |
| ZBTB48  | P        | P        |   | X |
| ZCCHC13 | BC,AF    | BC,AF    |   | X |
| ZDHHC19 | C,BC     | C,BC     |   | X |
| ZFAND1  | C,LA     | C,LA     |   | X |
| ZIM3    | N,M      | N,M      |   | X |
| ZNF16   | BC       | BC       |   | X |
| ZNF177  | BC,AF    | BC,AF    |   | X |
| ZNF212  | C        | C        |   | X |
| ZNF225  | N        | N        |   | X |
| ZNF234  | AF,M     | AF,M     |   | X |
| ZNF331  | BC,LA    | BC,LA    | X | X |
| ZNF442  | C        | C        |   | X |
| ZNF507  | BC,P     | BC,P     |   | X |
| ZNF585A | P,C      | P,C      | X | X |
| ZNF595  | C        | C        | X | X |
| ZNRF4   | M,P      | M,P      |   | X |

Table X: Manual annotation of the retest phenotypes using the Qiagen library. HGNC is the target HGNC gene symbol. HeLa and U2OS phenotypes are the manually observed retest phenotypes in HeLa and U2OS cells (respectively), expressed in terms of phenotypic classes, as defined in Table SII. HeLa reproducibility is the reproducibility of the HeLa phenotypes between the primary screen and the retest screen. The X mark indicates that the phenotype is reproducible. Qiagen reproducibility is the reproducibility of the retest phenotypes between the HeLa and the U2OS cells. In total, 280 candidates reproduced their phenotypes between the primary and the retest screens, in both HeLa and U2OS cells.

| HGNC     | Nb. of siRNAs | Pool phenotype    |
|----------|---------------|-------------------|
| A1BG     | 3/4           | P, C              |
| ANKRD31  | 4/4           | P, C              |
| ANLN     | 3/4           | BC, P             |
| APOC3    | 2/4           | P                 |
| ATM      | 1/4           | P                 |
| ATP6V1B1 | 2/4           | BC, P             |
| AURKB    | 4/4           | P, C              |
| BCAR3    | 1/4           | P, C              |
| BLR1     | 2/4           | C, arrest         |
| BMPER    | 1/4           | P, C              |
| BRCA1    | 0/4           | N                 |
| C9ORF90  | 2/4           | P                 |
| CADM1    | 2/4           | BC, AF            |
| CAPN3    | 4/4           | P                 |
| CARD10   | 3/4           | P                 |
| CASP1    | 2/4           | P                 |
| CD3EAP   | 3/4           | BC, P, AF, M      |
| CGRRF1   | 0/4           | P                 |
| CKAP5    | 4/4           | Viability         |
| COL11A1  | 3/4           | P, binuclei       |
| COL6A1   | 2/4           | P                 |
| DAOA     | 1/4           | P                 |
| DDX4     | 3/4           | P                 |
| DONSON   | 3/4           | C, M, P, BC       |
| ERCC1    | 3/4           | C, P              |
| SUSD4    | 1/4           | P, BC             |
| FANCI    | 3/4           | P                 |
| CCDC49   | 2/4           | P                 |
| GIPR     | 1/4           | P                 |
| GPR124   | 1/4           | P                 |
| GPR34    | 1/4           | P                 |
| GPR34    | 0/4           | P                 |
| GPS1     | 4/4           | P                 |
| HAAO     | 1/4           | P                 |
| IK       | 4/4           | C, arrest         |
| KIF23    | 3/4           | BC, C, P          |
| TUBB     | 3/4           | Viability, arrest |
| LUC7L2   | 0/4           | P                 |
| STK40    | 4/4           | P, C              |
| MIA      | 2/4           | P, C              |
| MRE11A   | 0/4           | BC                |
| MTMR6    | 2/4           | P, C              |
| NARF     | 3/4           | P                 |
| NDST3    | 2/4           | P                 |
| NTN2L    | 2/4           | P                 |
| PBOV1    | 2/4           | P                 |
| RAB17    | 2/4           | P                 |
| REC8     | 2/4           | P                 |
| REEP3    | 3/4           | P                 |
| AJAP1    | 1/4           | P                 |
| SLC25A37 | 2/4           | P                 |
| SLC41A3  | 3/4           | P                 |
| SON      | 3/4           | M, BC             |
| SPOCK1   | 3/4           | P                 |
| STXBP5L  | 2/4           | P                 |
| TEKT3    | 2/4           | C, P              |
| TMEM61   | 3/4           | BC, P, AF         |
| TPM1     | 2/4           | P, C              |
| TRAIP    | 1/4           | P, BC             |
| TRAPPC2L | 2/4           | P, C              |
| TRAPPC3  | 4/4           | P                 |

Table XI: Manual annotation of deconvoluted Dharmacon siRNA phenotypes. HGNC is the target HGNC gene symbol. Number of siRNAs is the number of individual siRNAs showing the same phenotype as the corresponding Dharmacon siRNA pool (out of the total number of siRNAs in the pool). Pool phenotype is the phenotype observed with corresponding Dharmacon siRNA pool.



| HGNC     | Source    | Pool ID     | siRNA ID                                                 | Sequence                                                                                         |
|----------|-----------|-------------|----------------------------------------------------------|--------------------------------------------------------------------------------------------------|
| ABCB10   | Dharmacon | M-007300-00 | D-007300-01<br>D-007300-02<br>D-007300-03<br>D-007300-04 | GAAGAACGGTGTAGTTAT<br>CGAGAAATATGCCAGCAAA<br>CATCGTCTGTCCACCATTA<br>GCCAGAGGTGCCCATATT           |
|          | Qiagen    | 29D3        | SI00096950<br>SI00096957<br>SI00096964<br>SI03030062     | TAGACCCTAAGAAGTAATTA<br>ACCCTGCTTCTGGAACATTA<br>CCCAGTGTGGCTGAGATCCAA<br>AACGGTGTAGTTATTGCCCA    |
| ADAMTS18 | Dharmacon | M-005769-01 | D-005769-01<br>D-005769-03<br>D-005769-04<br>D-005769-05 | ACAAGAACCTGGAGGATTA<br>GCCAGTATCTCAAGAAATF<br>GGGCACAACCTTTGGTATGA<br>GGTGTGAGACCAAGTTTAT        |
|          | Qiagen    | 222F2       | SI00292103<br>SI00292110<br>SI00292117<br>SI00292124     | CAGGTTTAATAAGGACACGAA<br>AACCAGCATAAAGCAAATGAA<br>CTGGCTTGTGAGGTTAATAA<br>TGGAGGTTACATAAATGTA    |
| AGXT2    | Dharmacon | M-009818-00 | D-009818-01<br>D-009818-02<br>D-009818-03<br>D-009818-04 | GGAAAGAAGAGCTAAGTAA<br>GGACCTACATGTTACTAAA<br>GGAAGCAGATACCTGGATT<br>CATAACCACTCCAGAGATT         |
|          | Qiagen    | 2B4         | SI00293545<br>SI03045931<br>SI03050999<br>SI03107097     | TGGGACCTACATGTTACTAAA<br>AGGGCGCACTCAAACAACATA<br>ATGGAGTTGTCCAGTACCCAA<br>GTGGGACAGGTTGCCAACCAA |
| ANAPC7   | Dharmacon | M-021035-01 | D-021035-02<br>D-021035-03<br>D-021035-04<br>D-021035-05 | GGAATGCTGTGAGTAAGTA<br>GCTCGCACCTTGTGCGCTTA<br>GGAACGCACTGGCTAATCA<br>GCACAGACCCCTACCCTTT        |
|          | Qiagen    | 11E2        | SI00114688<br>SI00114709<br>SI02652895<br>SI02653532     | ATGGATGTATATGGCTACCTA<br>ACCGTTTGTCTTGAAGACCCA<br>CCCAAAGGCCAGATTACATTA<br>CAGCTTCTATAGCAAACGCTA |
| ANLN     | Dharmacon | M-006838-02 | D-006838-01<br>D-006838-02<br>D-006838-03<br>D-006838-05 | GGAGATGGATCAAGCATTA<br>GAAATCCGCTTGCCTCTAA<br>GGATAAATCTGGCTAATTG<br>ACGCAACACTTTTGAATTA         |
|          | Qiagen    | 61E4        | SI00122703<br>SI02777859<br>SI02777866<br>SI03120285     | AAGGTTTCACTGAATGCGAAA<br>CACCGTTTCCATCGTCTCGTA<br>CTGATGCTTGTACAAACCTA<br>TGGCGATGCCTCTTTGAATAA  |
| APBB1IP  | Dharmacon | M-015662-00 | D-015662-01<br>D-015662-02<br>D-015662-03<br>D-015662-04 | GAATACGGATAGCCAAGTA<br>CAGAAGGAGTCCCAGTATA<br>TTAAGAAGCTCGTGTCAA<br>ATAAAGCGCCCACTGACTA          |
|          | Qiagen    | 136B2       | SI00297871<br>SI00297878<br>SI00297885<br>SI00297892     | AAGATTTAAATGAGTCCTTAA<br>CAGCATCTCTACAAGCATCAA<br>CAGAATATCTGCCAAATGTA<br>CAGCCTCTCTTGGTTATGGAA  |
| ARCN1    | Dharmacon | M-013063-00 | D-013063-01<br>D-013063-02<br>D-013063-03<br>D-013063-04 | AAACAGAGAGTGTAAGATA<br>GATCAGAACCTTACAGAA<br>GACGGAGGATTACAGAATA<br>TGAAATATCTGAGCACTGT          |
|          | Qiagen    | 90H7        | SI00299754<br>SI00299761<br>SI00299768<br>SI00299824     | CCCCTTGTGTCAATATTA<br>AAGGCAAATTTTAAATCAAA<br>CCCATTAATATGGAAAGTGTA<br>AAGGCTGAGATGCGTCTGTA      |
| ARFGEF1  | Dharmacon | M-012207-00 | D-012207-01<br>D-012207-02<br>D-012207-03<br>D-012207-04 | GAACAGGTCTCCAACAATF<br>GATCACAATGGATGGTTA<br>GAACTACGATCCAAGATTC<br>GAACAGGAACTTGGTATTA          |
|          | Qiagen    | 118G3       | SI00300825<br>SI00300832<br>SI00300839<br>SI00300853     | CAGGATTTATTTAGAATTGTT<br>TCCGGTATTACTGAAATGAAA<br>AGGGATAGATTTATTTAATAA<br>CAAGATTGTGATGATACTGAA |
| ASNSD1   | Dharmacon | M-020489-00 | D-020489-01<br>D-020489-02<br>D-020489-03<br>D-020489-04 | CAAGGTCCCTGGTCATTTA<br>GCATTTCACTCAAGATTTA<br>GCAGTAATATTTCCAATGT<br>GGAGTGAAATCCTATCAGA         |
|          | Qiagen    | 44E9        | SI00123872<br>SI03031014<br>SI03099201<br>SI03101287     | GCGGGACTAAAGGAACTACAA<br>AGAAGAAGCTCGAATATGTCA<br>CTGGGTCGAATTTCTTCTAGA<br>GACAGAGTTATTGGTGATCAT |

| HGNC     | Source    | Pool ID     | siRNA ID                                                 | Sequence                                                                                           |
|----------|-----------|-------------|----------------------------------------------------------|----------------------------------------------------------------------------------------------------|
| ASPH     | Dharmacon | M-004294-00 | D-004294-01<br>D-004294-02<br>D-004294-03<br>D-004294-04 | GGTTTGTATCTTGTGACTA<br>AAACTAGGAATCTATGATG<br>GAGGAAAGGCGGACTCTCA<br>GCATGGAGGACACAAGAAT           |
|          | Qiagen    | 12F7        | SI00062601<br>SI03023958<br>SI03111591<br>SI03113824     | CTGTAGAAGATTACAGGTAA<br>TTGCACCATGATACAGATGAT<br>TAGGACTTAAAGAGAGATCTA<br>TCCAGTGAACCAGTAGTAGAA    |
| ATP7A    | Dharmacon | M-019280-00 | D-019280-01<br>D-019280-02<br>D-019280-03<br>D-019280-04 | GGAGATGGCTCATAAGGTA<br>GATAAACGCTCCCTAAACA<br>GCAAAGGAGTCCATCATAT<br>GGAAAGAATTCATCTAAGT           |
|          | Qiagen    | 31G6        | SI00000854<br>SI00000875<br>SI03075730<br>SI03095568     | CAGCCAGTTATTCTTCCATTA<br>TAGCAGCTTGTAGTATTGAAA<br>CCAGTGGCCCATCTTATAATA<br>CTGCGTAGCTCCAGAGGTTTA   |
| BCAR3    | Dharmacon | M-011469-00 | D-011469-01<br>D-011469-02<br>D-011469-03<br>D-011469-04 | GGAAGAACCTCGCTCAGCA<br>GGACCCAACCTGTGGAATAT<br>GGACATAATTGAAAGACAC<br>GCGAGATGGTGACTTCCTA          |
|          | Qiagen    | 60A10       | SI00053095<br>SI00053102<br>SI03080196<br>SI03081603     | AAGGTATCAGTTATATGATAT<br>GCCCCACGAGTTTGTAGTCAAA<br>CCGAGCGGCCACTCTGAGTAA<br>CCGGAACCTCTGGCGTCAACTA |
| BCL2L1   | Dharmacon | M-003458-00 | D-003458-01<br>D-003458-02<br>D-003458-03<br>D-003458-04 | CAGCTTGGATGGCCACTTA<br>ACAAGGAGATGCAGGTATT<br>CCTACAAGCTTTCCAGAA<br>GGTAGTGAATGAACTCTTC            |
|          | Qiagen    | 41B10       | SI00023191<br>SI03025141<br>SI03068352<br>SI03112018     | CTGCTTGGGATAAAGATGCAA<br>TTGGCTTTGGATCTTAGAAGA<br>CAGCTGCCTCACTTCCTACAA<br>TAGGGTGGCCCTTGCAGTCA    |
| BRD9     | Dharmacon | M-014250-00 | D-014250-01<br>D-014250-02<br>D-014250-03<br>D-014250-04 | CAATGAAGATACAGCTGTT<br>GGCCAGATACCGTGTACTA<br>CACGCAGGCTTTAAGATGA<br>AGTCAGTTACGGAATTTAA           |
|          | Qiagen    | 218F6       | SI00313341<br>SI00313348<br>SI00313355<br>SI00313362     | CTGGATATTCAATGATAATAA<br>TGGATATTCAATGATAATAA<br>CTCCTGGATATTCAATGATAA<br>CAAGTCAGTTACGGAATTTAA    |
| C13ORF3  | Dharmacon | M-015700-00 | D-015700-01<br>D-015700-02<br>D-015700-03<br>D-015700-04 | GATCGTACTTCGTTGGTFTT<br>AATCCAGGCTCAATGATAA<br>GTACATCGTATCCCAAGTT<br>TACCAAACAATCACTAGTA          |
|          | Qiagen    | 187E11      | SI00317933<br>SI00317940<br>SI00317947<br>SI00317954     | AAGGATGATGTTAATATTCTT<br>CAGCTGGAAGTATTATCTAA<br>AGGGAATATATTCAAAGTGTA<br>AAAGACAAACATGAACATTA     |
| C16ORF68 | Dharmacon | M-014309-00 | D-014309-01<br>D-014309-02<br>D-014309-03<br>D-014309-04 | CAAGGTACATCCCATGATT<br>ACAGAGATGTTACACAAA<br>CAAGGCAGCCCACAGATA<br>TGTCAGATGTCCACCTCTA             |
|          | Qiagen    | 152G9       | SI00636251<br>SI00636258<br>SI00636265<br>SI00636272     | CCGCACGATATCATCAGAATA<br>TTAGAGTGTATTTCTAGTAAA<br>AAGGTACATCCCATGATTCTA<br>CCAGCGAAACATTCGCCCTCAA  |
| C1QA     | Dharmacon | M-013136-00 | D-013136-01<br>D-013136-02<br>D-013136-03<br>D-013136-04 | CCATATCGCTGGCCTCTAT<br>GCACTGTACCCGGCTACTA<br>AGGAAGAACCGTACCAGAA<br>CGTGGCATCCCAGGAATTA           |
|          | Qiagen    | 91E5        | SI00323729<br>SI00323736<br>SI00323743<br>SI00323750     | CCCCGGAATTAAGGCACCAA<br>ACGGTCATCACCAACCAGGAA<br>ACAGGCATCCAAGGCCTTAAA<br>CCCAGGAAACATCAAGGACCA    |
| C20ORF20 | Dharmacon | M-006381-00 | D-006381-01<br>D-006381-02<br>D-006381-03<br>D-006381-04 | GAAGAACTCCTCAGACTTG<br>GAACTTCGTCTTCCAGAA<br>GAACCGACACTTCCACATG<br>ACAAAGTCCTGACCGCAA             |
|          | Qiagen    | 140F4       | SI00325325<br>SI00325332<br>SI00325339<br>SI00325346     | CTCGGATTAGCAAGCAATAAA<br>TCGTGTGACTGCGAACATTA<br>CCCACCCACCTGGGAACTAA<br>CAGAGAATTTGTAGCGGTTAT     |

| HGNC     | Source    | Pool ID     | siRNA ID                                                 | Sequence                                                                                         |
|----------|-----------|-------------|----------------------------------------------------------|--------------------------------------------------------------------------------------------------|
| C2ORF60  | Dharmacon | M-016468-00 | D-016468-01<br>D-016468-02<br>D-016468-03<br>D-016468-04 | GGTGATGTATTATTCATTC<br>GGACTTCTATGCACGACGA<br>CGAGATGCCAGTATTTAT<br>CCGAGTTACCAGAGGAATA          |
|          | Qiagen    | 174D10      | SI00411572<br>SI00411579<br>SI00411586<br>SI00411593     | CAGATTGTTATAATTAAGAA<br>ATGCCAGTATTTATATTTAA<br>CAGCAAGAGAATTGATACAAA<br>ATGGATAATTTGTTAATACAA   |
| C6ORF182 | Dharmacon | M-018100-00 | D-018100-01<br>D-018100-02<br>D-018100-03<br>D-018100-04 | GAACATCAGCGTAAGCTAT<br>CTAAAGCACTCCAAGGAAA<br>GAACAACCTCCTGGTGTA<br>GCACCAAGAAGTACTGAAA          |
|          | Qiagen    | 193E7       | SI00331233<br>SI00331240<br>SI00331247<br>SI00331254     | CTGGTGGGTTCCAAATAATA<br>TCACTTGGATATAATAATATA<br>ATGCTTTATAATAAATTTACA<br>TACTAGATTGACAATATTCAA  |
| CADM1    | Dharmacon | M-016565-00 | D-016565-01<br>D-016565-02<br>D-016565-03<br>D-016565-04 | GAAGTCAACTGCACTGCTA<br>GGAAAGCTCACTCGGATTA<br>GTACATACTTCACTCATGA<br>GAGAGTCGATGATGAAATG         |
|          | Qiagen    | 212E11      | SI00446740<br>SI00446747<br>SI00446754<br>SI00446761     | CAGAATTTAGTGTATCCATA<br>CTGGCCCTATTTAGATGATA<br>TCCGACCATAGTATAATCATA<br>TTGGGTGAACAAAACATGAAA   |
| CAPRIN1  | Dharmacon | M-016057-00 | D-016057-01<br>D-016057-02<br>D-016057-03<br>D-016057-04 | AGGGTAAGCTTGATGATTA<br>GCACGTCGGGAGCAGCTTA<br>GGAAATTGTTGAGCGTGTT<br>TAGTCAGCCTCACCAAGTA         |
|          | Qiagen    | 205D7       | SI00626003<br>SI00626010<br>SI00626017<br>SI00626024     | CGGGATTACTCTGGCTATCAA<br>TTGGATGAATTCTATAAGCTA<br>CAGCCTATGAATCCAACACAA<br>TAGCAGTGGAAATCAATGAAA |
| CARS     | Dharmacon | M-010335-00 | D-010335-01<br>D-010335-02<br>D-010335-03<br>D-010335-04 | GAAGAGTGTTGAAGGATTA<br>GGACAACGGTTACGGCTAT<br>GAAGACAGCAATTCACAAA<br>CGACAAATACTCCAAGTTT         |
|          | Qiagen    | 7H8         | SI00338513<br>SI00338520<br>SI00338527<br>SI03072384     | AAGGAAGTGTTCATACCTCAA<br>CACCCCTGGGTCCATAAATTA<br>CTGGTAGACAGAAACACCTTA<br>CAGGTGTTATCAGAATTCGGA |
| CASP8AP2 | Dharmacon | M-012413-00 | D-012413-01<br>D-012413-02<br>D-012413-03<br>D-012413-04 | GAACAGAGCTCTATGATAC<br>TGGCATAGTTGATCGTTTA<br>GAGAGTAAGTCGTGTATC<br>GCACATGTTACGAATGATA          |
|          | Qiagen    | 40E9        | SI00097272<br>SI00097279<br>SI02638937<br>SI03056501     | CAGCTGATGTGCGGAAGTCAA<br>AACGAAGTTTCGAGATTCCTA<br>CAGTCTGATCTCAATAAGGAA<br>CACATACGTAGATCTAACGAA |
| CD3EAP   | Dharmacon | M-020021-00 | D-020021-01<br>D-020021-02<br>D-020021-03<br>D-020021-04 | GAAAGAAACCTTCGAGCCA<br>GATTAACACTGAGCCTCTA<br>ATACGGAGCTGTGGCTTAT<br>GAAAGAGAGAGGTCACACA         |
|          | Qiagen    | 119D5       | SI00305249<br>SI00305256<br>SI00305263<br>SI00305270     | CCGGGAAACTGAGGAACTAAA<br>AAGGAGCTGTTTCTGGGTAA<br>CAAGGGCAAATGGCAGGCAA<br>CAGATTAACACTGAGCCTCTA   |
| CDC37L1  | Dharmacon | M-020779-00 | D-020779-01<br>D-020779-02<br>D-020779-03<br>D-020779-04 | TAAACTCGGTGGTACATAA<br>GCTTAGCACTGCATAATTC<br>ACATCAAGCTGTTGTAATG<br>TCACAAAGTTTTCAACCTA         |
|          | Qiagen    | 142F2       | SI00341005<br>SI00341012<br>SI00341019<br>SI00341026     | TTGGTGTTCATCACATTA<br>CAGATTATCTTCAGTATTCTA<br>CAGGAGCATGCCAAAGCACAA<br>ATGGAACAAATAGCACATCAA    |
| CDC42    | Dharmacon | M-005057-00 | D-005057-01<br>D-005057-02<br>D-005057-03<br>D-005057-04 | GGAGAACCATATACTCTTG<br>GATTACGACCGCTGAGTTA<br>GATGACCCCTCTACTATTG<br>CGGAATATGTACCGACTGT         |
|          | Qiagen    | 42C4        | SI03028935<br>SI03049914<br>SI03068261<br>SI03072118     | AACCTAATCTTGTAGATGCA<br>ATGCATTAGTGTGAACCAAT<br>CAGCTGAAGACCTGTATGTA<br>CAGGTGAGGCTCTCTAGTTTA    |

| HGNC   | Source    | Pool ID     | siRNA ID                                                 | Sequence                                                                                          |
|--------|-----------|-------------|----------------------------------------------------------|---------------------------------------------------------------------------------------------------|
| CDCA5  | Dharmacon | M-015256-00 | D-015256-01<br>D-015256-02<br>D-015256-03<br>D-015256-04 | GAAAGCCCATCGTCTTAAA<br>GGTCCCAGCTGTCCAATCA<br>GATCGTGGCCCATGCTGTA<br>CCTGAAATCTGGCCGAAGA          |
|        | Qiagen    | 39C6        | SI00148708<br>SI00148715<br>SI02757965<br>SI02757972     | CAGAAAGCCCATCGTCTTAAA<br>ACCCGAGAAACAGAAACGTAA<br>CTCGGAAAGTTTCTCGCGTA<br>GAGGAACTAAATTTAAGGAAA   |
| CDCA8  | Dharmacon | M-021163-00 | D-021163-01<br>D-021163-02<br>D-021163-03<br>D-021163-04 | GAAGAGAACTCAGTCCATA<br>GGAGAGAGCCTGCGATTAT<br>TGAAGTGGCTTGACTACTT<br>GAAAGGTAATACAGGTAGA          |
|        | Qiagen    | 61C4        | SI00120582<br>SI00120589<br>SI03065636<br>SI03092740     | ACGAAAGGTAATACAGGTAGA<br>CTGGTACCTACTTTCAATAAA<br>CAGCAGCATAACGGACCCACAA<br>CTGAAAGACTTCGACCGTGAA |
| CDKN2A | Dharmacon | M-011007-00 | D-011007-01<br>D-011007-02<br>D-011007-03<br>D-011007-04 | CCGCATAGATGCCGCGGAA<br>GCGGAAGGTCCCTCAGACA<br>CACCAGAGGCAGTAAACCAT<br>CGGAAGGTCCCTCAGACAT         |
|        | Qiagen    | 81E8        | SI00001470<br>SI02659503<br>SI02664396<br>SI02664403     | CCCATTGAAAGAACCAGAGA<br>CACGCCCTAAGCGCACATTCA<br>CAGAACCAGCTCAAATAAA<br>TACCGTAAATGTCCATTTATA     |
| CENPE  | Dharmacon | M-003252-01 | D-003252-05<br>D-003252-06<br>D-003252-07<br>D-003252-08 | GAAGACAGCTCAAATAATA<br>CAACAAAGCTACTAAATCA<br>GGAAAGAAGTGCTACCATA<br>GGAAAGAAATGACACAGTT          |
|        | Qiagen    | 39B6        | SI00028679<br>SI00028693<br>SI02653217<br>SI02653756     | AAGATGGTTGGCATAGATAAA<br>ACCACCTTAGAGGATATATAA<br>CAGGTTAATCCTACCACACAA<br>CACGATACTGTTAACATGAAT  |
| CENPI  | Dharmacon | M-005268-00 | D-005268-01<br>D-005268-02<br>D-005268-03<br>D-005268-04 | GGTACAAGGTGAATAATTA<br>GAATAGAAGTGGATCATTT<br>GAAGGTGTGTGACATATAT<br>GGAATTCTCTCTCAGTTAT          |
|        | Qiagen    | 95B5        | SI00421876<br>SI00421883<br>SI00421890<br>SI00421897     | TCAGAAGAAATTGATATTCTA<br>CAAGACTTATCAAGAATTTAA<br>TACAAGGTGAATAATTATGAA<br>CCAGCTAATGTTTCGTCCTCTA |
| CEP192 | Dharmacon | M-032250-00 | D-032250-01<br>D-032250-02<br>D-032250-03<br>D-032250-04 | GGACTTAAGTGCTACTAGT<br>GAGGTAGGTTGGACATCAA<br>CAGCTATTGTTTATGTTGA<br>GCTCAGCGGTATTTGGGAA          |
|        | Qiagen    | 215H11      | SI00343581<br>SI00343588<br>SI00343595<br>SI00343602     | AAGGAACATTATCATCTATTA<br>CAGAAGTTAGTAGATATGAAA<br>ACCCATATTCTAATACCTTAA<br>AACAGTGAATGTGCAAGTAAA  |
| CFL1   | Dharmacon | M-012707-00 | D-012707-01<br>D-012707-02<br>D-012707-03<br>D-012707-04 | TGACAGGGATCAAGCATGA<br>GCGGTGCTCTTCTGCCTGA<br>GTCAAGATGCTGCCAGATA<br>GCTATGCCCTCTATGATGC          |
|        | Qiagen    | 41A4        | SI00078190<br>SI02635381<br>SI02635388<br>SI02654134     | CAGTAAGGGACCTTCGATTAA<br>CTGACAGGGATCAAGCATGAA<br>CAAGGTGTTCAACGACATGAA<br>CAAGCATGAATTGCAAGCAAA  |
| CGRRF1 | Dharmacon | M-006933-00 | D-006933-01<br>D-006933-02<br>D-006933-03<br>D-006933-04 | GAAGATAGCCTCCTTACAT<br>GACCTTAGCTGATGAGGAT<br>TATGAATACTCGCCGCTTT<br>CTACATCGCGGTGGTCTTT          |
|        | Qiagen    | 60H5        | SI00089740<br>SI03025680<br>SI03101658<br>SI03120019     | CTGATAGGACTTATAAACTAT<br>TTGGTTGGGATGTTCCAGTAA<br>GACCGGAAATTTATGATATT<br>TGGCATAACCTTGACAACAGA   |
| CHEK1  | Dharmacon | M-003255-02 | D-003255-06<br>D-003255-07<br>D-003255-08<br>D-003255-09 | GCAACAGTATTTCCGGTATA<br>GGACTTCTCTCCAGTAAAC<br>AAAGATAGATGGTACAACA<br>CCACATGTCTGATCATAT          |
|        | Qiagen    | 81A9        | SI00287658<br>SI00605094<br>SI02625798<br>SI02660007     | AAGAAAGAGATCTGTATCAAT<br>CCCGCACAGGTCTTTCTTAT<br>CCACCTCATATAACAACAAT<br>TTGGAATAACTCACAGGGATA    |

| HGNC   | Source    | Pool ID     | siRNA ID                                                 | Sequence                                                                                           |
|--------|-----------|-------------|----------------------------------------------------------|----------------------------------------------------------------------------------------------------|
| CHN1   | Dharmacon | M-010251-00 | D-010251-01<br>D-010251-02<br>D-010251-03<br>D-010251-04 | GAATATAGACCTCCTGTTT<br>TATGAGATCTCCAGAATA<br>CAATTCACCTCATTACATA<br>GACCTACACTTTGGCTTTA            |
|        | Qiagen    | 92D5        | SI00345989<br>SI00345996<br>SI00346003<br>SI00346010     | AAGGTTATCCATACCAATAAA<br>ACCCTGTTTGATACAGATGAA<br>CACGTAGGATACACAACCTTA<br>CTGGCTGTTACATTACCATAA   |
| CHST12 | Dharmacon | M-008238-00 | D-008238-01<br>D-008238-02<br>D-008238-03<br>D-008238-04 | GCGCGCACCTGACCTTCAA<br>CTACGAGGCCGACTTTGTT<br>AGAGCGACCTTCCCAGAAA<br>CCAGATCGACTACGACTTC           |
|        | Qiagen    | 141F4       | SI00346465<br>SI00346472<br>SI00346479<br>SI00346486     | CAGGATTTCTAGGATTTCTAA<br>CAGAGGTAAACCGGTCAGTTA<br>CAGCGCGCACCTGACCTTCAA<br>AAGATTAATATATTTACGGTA   |
| CHST5  | Dharmacon | M-012800-00 | D-012800-01<br>D-012800-02<br>D-012800-03<br>D-012800-04 | GCGTTGCCCTTCACTAAGA<br>GCCGAAACCTGTCCGCCTT<br>GCAAGCAGGACGTATGCAA<br>GCAAGCCAATCGAGGCCTT           |
|        | Qiagen    | 212E10      | SI00346605<br>SI00346612<br>SI00346619<br>SI00346626     | AGGGAGTAAGTTACTGCTAAA<br>CAGGGAGTAAGTTACTGCTAA<br>TACTGCTAAATTAATTAATA<br>TAGAGTGATTCAACCACCTTA    |
| CKAP5  | Dharmacon | M-006847-00 | D-006847-01<br>D-006847-02<br>D-006847-03<br>D-006847-04 | GGAAATAGCTGTTACATA<br>GAAGAAACCTCAAGTGGTA<br>GGCCAAAGCTCCAGGATTA<br>CAAGAAACCTGGATGGAAA            |
|        | Qiagen    | 1C7         | SI00107961<br>SI00107975<br>SI02653588<br>SI02654043     | CAGCTTTAGTTTACTAAACTA<br>CACAGTGTCTCCATAGGTAA<br>AAGGGTCGACTCAATGATTCA<br>CAGGTATTATTAATGACGCAA    |
| CLDN11 | Dharmacon | M-019258-00 | D-019258-01<br>D-019258-02<br>D-019258-03<br>D-019258-04 | GAAGAGTGCCACGTATAA<br>GCCCAGGCCTTTGGTGAAA<br>GATGATTGCTGCCTCGGTC<br>AGACCACCATCGTGAGCTT            |
|        | Qiagen    | 101F4       | SI00347725<br>SI00347732<br>SI00347739<br>SI00347746     | TAGACTTTATGCAATAAATAA<br>AACATAAATTGTACTGTTGAA<br>AAGTAAAATCTGTGCAATAAA<br>CTGCCAGGCTCTAAAGCCAAA   |
| CLN8   | Dharmacon | M-013304-00 | D-013304-01<br>D-013304-02<br>D-013304-03<br>D-013304-04 | GTTCTAACCTACCACATGT<br>GACAGCAACGGGATTCCTT<br>CATATTGGACCCATAAGAA<br>TCAATCCGGTGGACTGGAA           |
|        | Qiagen    | 3A7         | SI00123193<br>SI00123200<br>SI00123207<br>SI00123214     | TACGCTAATCATTAAATCCATA<br>ACCAAGGTGTATAGTAACCTA<br>CCGGACCGTGTCAAGCATCTA<br>CCCGGACAACCTTGAATGAAAT |
| CLSPN  | Dharmacon | M-005288-00 | D-005288-01<br>D-005288-02<br>D-005288-03<br>D-005288-04 | GGAAATACCTGGAGGATGA<br>GGACGTAATTGATGAAGTA<br>GCAGATGGGTTCTTAAATG<br>GAATTTATATGCTGGGAAA           |
|        | Qiagen    | 149E7       | SI00348593<br>SI00348600<br>SI00348607<br>SI00348614     | CTGCAGTATTTACAACATCAA<br>AACAGTGATCACCATAGTAAA<br>AAGAGTCATTAGAATCAATAA<br>AAGCACATACATGATAAAGAA   |
| CLTC   | Dharmacon | M-004001-00 | D-004001-01<br>D-004001-02<br>D-004001-03<br>D-004001-04 | GAAAGAATCTGTAGAGAAA<br>GCAATGAGCTGTTTGAAGA<br>TGACAAAGGTGGATAAAT<br>GGAAATGGATCTCTTTGAA            |
|        | Qiagen    | 92F6        | SI02651733<br>SI02651740<br>SI02651747<br>SI02651754     | ACAGTTCTACTTAGAATTCAA<br>CCGGAGAGATTTCTTCGTGAA<br>ATGGCTGTACGTAATAACTTA<br>CACGTGTTATGGAGTATATTA   |
| CLUAP1 | Dharmacon | M-014449-00 | D-014449-01<br>D-014449-02<br>D-014449-03<br>D-014449-04 | CTAAAGACCTGCTCAATAA<br>TGACTTATCTGGAACAACA<br>GAGATGCTCATGCAAGGAA<br>TAACGATGACTCGGACATA           |
|        | Qiagen    | 212G5       | SI00348761<br>SI00348768<br>SI00348775<br>SI00348782     | CTGGAAATAAACGAGACTGAA<br>ACCCTCAGACTTGTAGGTAAA<br>TTCCACCTTATTTATCTTCTA<br>AACCTCAGACTTGTAGGTAA    |

| HGNC   | Source    | Pool ID     | siRNA ID                                                 | Sequence                                                                                          |
|--------|-----------|-------------|----------------------------------------------------------|---------------------------------------------------------------------------------------------------|
| CNTFR  | Dharmacon | M-007856-00 | D-007856-01<br>D-007856-02<br>D-007856-03<br>D-007856-04 | GGACAATGAGATTGGGACA<br>GCGGTGACGTGGCGGGTAA<br>CTGCATGGCTCCAAAATTA<br>GGACTGAGGAACCGCGACA          |
|        | Qiagen    | 22A10       | SI00153825<br>SI00153832<br>SI00153839<br>SI03068338     | ACGCCGGGAAGGAGTACATTA<br>AAACGTCACCATTTTCATGAAA<br>CTGCGGTGACGTGGCGGGTAA<br>CAGCTGCCGCTCCAACACTTA |
| COL9A3 | Dharmacon | M-011624-00 | D-011624-01<br>D-011624-02<br>D-011624-03<br>D-011624-04 | GACCTTCAGTGCCCAAGTA<br>GATGATCAGCGAACAATTT<br>CCAAGGAGCCGTGTTAGGA<br>CGGCATTGACGGAGAAGCT          |
|        | Qiagen    | 92E7        | SI00351029<br>SI00351036<br>SI00351043<br>SI00351050     | CAGGCTCTCGAAGTCATAAA<br>CAGGGTGACAGAGGAGACAAA<br>AAGGTAGGGTGTGTATATATA<br>AGCGAACAAATTCACAGTTA    |
| COPA   | Dharmacon | M-011835-00 | D-011835-01<br>D-011835-02<br>D-011835-03<br>D-011835-04 | ACTCAGATCTGGTGTAAATA<br>GCAATATGCTACACTATGT<br>GATCAGACCATCCGAGTGT<br>GAGTTGATCCTCAGCAATTT        |
|        | Qiagen    | 92D10       | SI00351477<br>SI00351484<br>SI00351491<br>SI00351498     | TCCCACCTGAGTTCAAATTCAA<br>CTGGATTTCAACAGCTCCAAA<br>CTGGCGCATGAATGAATCAAA<br>AAGCTTAATGACCTCATCCAA |
| COPB1  | Dharmacon | M-017940-00 | D-017940-01<br>D-017940-02<br>D-017940-03<br>D-017940-04 | CGACACAGCTATGTTAGAA<br>TATAAGGTCTGTCATGCTA<br>CCTCATGACTTCGCAAATA<br>GCTGTTACCGCCATATAA           |
|        | Qiagen    | 92E10       | SI02655702<br>SI02655709<br>SI02655716<br>SI02655723     | CAGGATCACACTATCAAGAAA<br>CAAGGATTGGTTATAATATAA<br>CAGAATTGCTAGAACCTTTAA<br>CACCAACATGGTTGATTTAAA  |
| COPB2  | Dharmacon | M-019847-01 | D-019847-02<br>D-019847-03<br>D-019847-04<br>D-019847-05 | GAAGGGAGCATCATGTTTA<br>CAACAGCATTGTAAAGATA<br>GGACACACCCATTATGTTA<br>TATGGGCAGTTGTGAAAATA         |
|        | Qiagen    | 36H10       | SI00068096<br>SI02664809<br>SI02664816<br>SI03095792     | CAGTACGTATTTGGCATTCAA<br>ACGATTCTTCAGAGTATGCAA<br>CAGGTTTCAAGGGTAGTGAAA<br>CTGCTAGATCTGATCGAGTTA  |
| COPG   | Dharmacon | M-019138-00 | D-019138-01<br>D-019138-02<br>D-019138-03<br>D-019138-04 | GAGGGTGGCTTTGAGTATA<br>GCAAACACGCCGCTCTAT<br>GAAGAGGCTGTGGGTAATA<br>GGAGGCCCGTGATTTAAT            |
|        | Qiagen    | 37G2        | SI00113666<br>SI02641905<br>SI02641912<br>SI03115546     | CCGAGCCACCTTCTACCTAAA<br>CACCGACTCCACTATGTTGAA<br>AGGCCCGTGATTTAATGAAA<br>TCCGTCGGATGTGCTACTTGA   |
| COPZ1  | Dharmacon | M-020293-00 | D-020293-01<br>D-020293-02<br>D-020293-03<br>D-020293-04 | CCAAAGAACAGATCAAGTG<br>GGCTGTGGATGAAATGTA<br>GAACCTTCCCTGTATACTG<br>CAACAAGACCCATCGGACT           |
|        | Qiagen    | 121G8       | SI00351729<br>SI00351736<br>SI00351743<br>SI00351750     | AGCGATTTAAATTGTATTGAA<br>TTGGCTGTGGATGAAATGTA<br>TTGGGAATAGTTCATAGGGAA<br>TCCCAGCATATTTAGATAATA   |
| COX6A2 | Dharmacon | M-012021-00 | D-012021-01<br>D-012021-02<br>D-012021-03<br>D-012021-04 | CGAGTTCGGTCCCCTACCAA<br>CAACTCCTATCTCCACTCG<br>GGACGGCAACCACACTCTG<br>CCACAATAGCCACGTGAAC         |
|        | Qiagen    | 92B11       | SI00352317<br>SI00352324<br>SI00352331<br>SI00352338     | CCCAGTTCCGTCCCTACCAA<br>CACCTTCAACTCCTATCTCCA<br>CAATAAAGGTGTGAAGCTTAA<br>CAACCACACTCTGTTCCACAA   |
| CR2    | Dharmacon | M-007861-00 | D-007861-01<br>D-007861-02<br>D-007861-03<br>D-007861-04 | GAAATGAAGTCTCTTATGA<br>GCAAATGGATAACAAGATAT<br>GGATAAACCTGCTCCTAAA<br>TAACGACACTGTGATATTT         |
|        | Qiagen    | 19F3        | SI00029428<br>SI00029435<br>SI00029442<br>SI03057502     | CACGCAATTATTATACAGATA<br>GCCGGATTAGTTATTATTTCTA<br>TACCTTATACGTGATATCAAA<br>CACCATCCGTTGTACAAGCAA |

| HGNC    | Source    | Pool ID     | siRNA ID                                                 | Sequence                                                                                          |
|---------|-----------|-------------|----------------------------------------------------------|---------------------------------------------------------------------------------------------------|
| CRNKL1  | Dharmacon | M-019013-00 | D-019013-01<br>D-019013-02<br>D-019013-03<br>D-019013-04 | GATCAAGTATGCCCGCTTT<br>GAAAGGGTACGAGTGATTT<br>CAATTATGATGCATGGTTT<br>CGAGCGTGCTTTAGATGTA          |
|         | Qiagen    | 133E9       | SI00354193<br>SI00354200<br>SI00354207<br>SI00354214     | TGCGAGTGGATTAATAATTTA<br>TCCAAAGAACAATTATTTAA<br>TAGGACTGTTGTTGAGATAAA<br>CACAGATGAAGAAGAATTTAA   |
| CXXC4   | Dharmacon | M-008812-00 | D-008812-01<br>D-008812-02<br>D-008812-03<br>D-008812-04 | CACCAGATCTGCAAATTTA<br>GCAAGAGGCTCATCAACTG<br>AGACAGTGCCTTTCAAAT<br>GAACACTGCAGACCTTTGG           |
|         | Qiagen    | 25G2        | SI00138495<br>SI00138502<br>SI00138509<br>SI00138516     | CAGCAGTTGCAGGAACCGCAA<br>TTCAAGGCATTTGGAAATGAA<br>CCAGATCTGCAAATTTAGAAA<br>TTGGAAATGAAGGCGAAACTA  |
| CYBRD1  | Dharmacon | M-017132-00 | D-017132-01<br>D-017132-02<br>D-017132-03<br>D-017132-04 | GCAGAGATCTACCATGTAA<br>GAACCACAATGTTAACAAT<br>GGAGCGCACTAGAGTTTAA<br>GTTAAACAATGAAGTAGCA          |
|         | Qiagen    | 155B11      | SI00358365<br>SI00358372<br>SI00358379<br>SI00358386     | AACCACAATGTTAACAATATA<br>AAGGATGTGATTAATATAAAT<br>AAGGGATTAGATAGCGACTAA<br>TAGTATCAATATTTACTTTAA  |
| DNAJB9  | Dharmacon | M-012815-00 | D-012815-01<br>D-012815-02<br>D-012815-03<br>D-012815-04 | GGAGGTGGATTATTTGATG<br>GGACAAAGAGGTAGTGGA<br>GAGGAAATATGGTTACTAC<br>GAAGCAAAAATTCAGAGAGA          |
|         | Qiagen    | 8E4         | SI00099442<br>SI02663045<br>SI02663052<br>SI03049067     | CAGAGTGTACATGAAACTGTA<br>TCGGATAGACTTATTTCTTTA<br>CAAGTGCATGATTTCACTTTA<br>ATGAAGTACCACCCTGACAAA  |
| DONSON  | Dharmacon | M-017453-00 | D-017453-01<br>D-017453-02<br>D-017453-03<br>D-017453-04 | CCTGTGGACTGGAGTATTA<br>CAGCAGAGCCTTATCTATT<br>GGTCTTGTCCAGCATTGTA<br>CTACCCTGTTCCCTCGTA           |
|         | Qiagen    | 214D5       | SI00372841<br>SI00372848<br>SI00372855<br>SI00372862     | CTGGAGCAACTTAGTCAAATA<br>TAGCAGGTTCTTGTTCATAA<br>AAGGAATATACTGAAATGTTT<br>TTCAAGATTCTTGAAGTTGAA   |
| DUX1    | Dharmacon | M-019955-00 | D-019955-01<br>D-019955-02<br>D-019955-03<br>D-019955-04 | GCAAGCATCCGGTGCATG<br>GAATGATACTCCTTTCGAC<br>TCAAAGTGATGCCCTGCGA<br>AGACGAAAGCGGACTGCCA           |
|         | Qiagen    | 128D5       | SI00375025<br>SI00375032<br>SI00375039<br>SI00375046     | CCGGTGTGGCGTGGAACCTCA<br>CCGGAAGGACTGGGACGCGCA<br>TGGCAGCACCTGCGCAGTGAA<br>AGGGTGCTCGTCTGCACTCCA  |
| DYNC1I2 | Dharmacon | M-012574-00 | D-012574-01<br>D-012574-02<br>D-012574-03<br>D-012574-04 | GTAAAGCTTTGGACAATA<br>GATGTTATGTGGTCACTTA<br>GCATTTCTGTGGAGGGTAA<br>GGGATAACCGTAGCAATAA           |
|         | Qiagen    | 93D11       | SI00371665<br>SI00371672<br>SI00371679<br>SI00371686     | CAGGTGCTAAACTGTCATTA<br>TGGGATAACCGTAGCAATAAA<br>CTCGATCGTGTCAATTTGTA<br>TTCTGTCTAAATGATAATTA     |
| EIF3C   | Dharmacon | M-009036-00 | D-009036-01<br>D-009036-02<br>D-009036-03<br>D-009036-04 | TCAATGAGCTGATGGATAT<br>GGACACAGGTTCCACATCT<br>GAAGATACCAAGAGAGTTG<br>ACGAATGGATGAAGAATTT          |
|         | Qiagen    | 7G11        | SI00055454<br>SI00055468<br>SI02781261<br>SI02781289     | GGGCGTCATTGTCAAGATCAA<br>ACCGTGATTTGAGTCCATA<br>CCGCCGACGCATGATCAGCAA<br>AACGAATGGATGAAGAATTTA    |
| EIF3I   | Dharmacon | M-019531-00 | D-019531-01<br>D-019531-02<br>D-019531-03<br>D-019531-04 | GTGGAGAGCTCAACCAGTA<br>GAAAGCAGCTGGCCCTTCT<br>GAAGATCCCTTGCAATGAC<br>CCACAGTACTTTGAATTTG          |
|         | Qiagen    | 110B7       | SI00377713<br>SI00377720<br>SI00377727<br>SI00377734     | CAGATTAAGTATAACCGCGAA<br>AAGAAATAAATTTGGTTTGGTA<br>CCCACAGTACTTTGAATTTGA<br>AAGGACCCTATCGTCAATGTA |

| HGNC    | Source    | Pool ID     | siRNA ID                                                 | Sequence                                                                                          |
|---------|-----------|-------------|----------------------------------------------------------|---------------------------------------------------------------------------------------------------|
| EIF4A3  | Dharmacon | M-020762-00 | D-020762-01<br>D-020762-02<br>D-020762-03<br>D-020762-04 | GAAAGCGGCTGCTCAAAGA<br>GAACGTTGCTGATCTTATC<br>GGTGAAACGTGATGAATTG<br>ACTATGATCTCCCTAATAA          |
|         | Qiagen    | 55F8        | SI00107828<br>SI00107835<br>SI02663794<br>SI03049676     | AAAGAGCAGATTTACGATGTA<br>CCGGAAGGGTGTGGCCATTAA<br>CCGCATCTTGGTGA AACGTGA<br>ATGATTCGTCGCAGAAGCCTA |
| ELAC2   | Dharmacon | M-015640-00 | D-015640-01<br>D-015640-02<br>D-015640-03<br>D-015640-04 | GAGCACAAAGTTAAAGGTTG<br>GGTAGAATGTCCAGATGAA<br>GTGGAAAGATTGATCAGTT<br>GAGAAGGCGTTCAGAGACT         |
|         | Qiagen    | 56C2        | SI00120708<br>SI03087798<br>SI03089163<br>SI03109526     | GTGGTAGAATGTCCAGATGAA<br>CTACGTCTTCTCCGAGTTCAA<br>CTCATGCAGGAGCACAAAGTTA<br>TACGAGGATGAAACCATGACA |
| ELL3    | Dharmacon | M-014601-00 | D-014601-01<br>D-014601-02<br>D-014601-03<br>D-014601-04 | GGAAGCAGTACCCAAGTTA<br>GGACATGGACCCAGATTA<br>GGGAGCGCCTCATTATTTG<br>GGACACAACCTGACTGAAG           |
|         | Qiagen    | 157C7       | SI00378609<br>SI00378616<br>SI00378623<br>SI00378630     | AAGGAACAAAGCAGCTATAAA<br>CAGAAATTGTCCACATTA<br>CAAGATAATCCAGGAATATAA<br>CCCGTGCTGCTTGCACTCGAA     |
| ELMO2   | Dharmacon | M-019222-00 | D-019222-01<br>D-019222-02<br>D-019222-03<br>D-019222-04 | ACAAGGAGGTGTTGGAATT<br>GCTATGACTTTGTCTATCA<br>TTAAGCAGATTGCAGGGTA<br>CAAATTGCGTAGCCTGAGT          |
|         | Qiagen    | 218E2       | SI00378693<br>SI00378700<br>SI00378707<br>SI00378714     | CCGTTTGGCACTGAACCACAA<br>ACGCAAAGCCATGTACACAAA<br>CCGGTCTATAATCCTGAATCA<br>CTGAGTTACTCTGAGATTCTA  |
| EPST11  | Dharmacon | M-015094-00 | D-015094-01<br>D-015094-02<br>D-015094-03<br>D-015094-04 | GAACAGAGCTAAACCGGTT<br>GAAGAGAAGCATTTAGAGA<br>GATGAAGGATGAACAACAT<br>GGTGGAAGCCAGTCAGAAA          |
|         | Qiagen    | 220G6       | SI00380765<br>SI00380772<br>SI00380779<br>SI00380786     | ACCGGAGAAATGAGATACAAA<br>TTACACAAATTTATAAATAAA<br>CACAAATTTATAAATAAATTT<br>TAGGTGGAAGCCAGTCAGAAA  |
| ERAF    | Dharmacon | M-020729-00 | D-020729-01<br>D-020729-02<br>D-020729-03<br>D-020729-04 | CAGCAGGTCTTCAATGATC<br>AAGAAGACATGGTGACTGT<br>CTCATGAGCTCCCAGATCA<br>CCGCAGGATTGAAGGAGTT          |
|         | Qiagen    | 133F8       | SI00380793<br>SI00380800<br>SI00380807<br>SI00380814     | CTGGATGAACTTCTACATCAA<br>AAGGCAGATGGCTCTTCTTAA<br>CAGGGACTTCCTGAAGTCTCA<br>CCGCAGGATTGAAGGAGTTCA  |
| ESF1    | Dharmacon | M-015235-00 | D-015235-01<br>D-015235-02<br>D-015235-03<br>D-015235-04 | GGAGAGAATTAGATAAAGA<br>TCAAACGACTGAAGTACTA<br>TGAGATTACACGTCGATTA<br>CCAAAGGAGGTGTAATATT          |
|         | Qiagen    | 134B7       | SI00326109<br>SI00326116<br>SI00326123<br>SI00326130     | CTGGGATAGATTAAGGCAAAA<br>TTGGTCGAGATTAAGAATTAA<br>TCCATAAATAATTGTACTTAA<br>CTGCATTATAGGGTTTATAAA  |
| FAM12B  | Dharmacon | M-013033-00 | D-013033-01<br>D-013033-02<br>D-013033-03<br>D-013033-04 | GCACACTGCTTGACAGAG<br>GGTCCAGAATCCTCTCAAA<br>ATGGATCGCTTCCGAAATG<br>GGTAGAACCTATCGGCAAC           |
|         | Qiagen    | 150A2       | SI00382921<br>SI00382928<br>SI00382935<br>SI00382942     | GACGGGTATGTTGATAGCATA<br>ATGGCATCTGTTCTTGATTAA<br>CTGCTTGTACAGAGCAAAGAA<br>CACATGTTTATCTATATCTCA  |
| FAM195B | Dharmacon | M-031000-00 | D-031000-01<br>D-031000-02<br>D-031000-03<br>D-031000-04 | GCACAGAGTTCAGGGCTG<br>TTTGAGGGCTGGACCATTG<br>CAGTCTACCTGTTACCTGA<br>GCCCTTGAGCCGTGGGATT           |
|         | Qiagen    | 196B3       | SI00506436<br>SI00506443<br>SI00506450<br>SI00506457     | CAGAAAGGAAATCAAGGCTCA<br>AACGTCGGCTTCATTTACGAA<br>CAGCTCTTTGGGCCTAGGATA<br>CAGGTGCATGCTGCCACACCA  |



| HGNC   | Source    | Pool ID     | siRNA ID                                                 | Sequence                                                                                          |
|--------|-----------|-------------|----------------------------------------------------------|---------------------------------------------------------------------------------------------------|
| FAM69B | Dharmacon | M-016278-00 | D-016278-01<br>D-016278-02<br>D-016278-03<br>D-016278-04 | GGAAGAAGATCTCCAACAC<br>TTACGGGACTTTTCTACATG<br>GGCGGGAGCTGGTACTGTT<br>GGGACAAGGATGTAACCAT         |
|        | Qiagen    | 176A10      | SI00634823<br>SI00634830<br>SI00634837<br>SI00634844     | CAGGCTCATGAGGCAGTGCAA<br>GAAGAACGTAATGTCAATAAA<br>CACAGCCACCTACGACTTCAA<br>CTGGCTGGTGTACGTGCACTA  |
| FBXL6  | Dharmacon | M-012425-00 | D-012425-01<br>D-012425-02<br>D-012425-03<br>D-012425-04 | GAGCTCAACCTGCAACTTT<br>GCACCGGCATCAACCGTAA<br>TGTCGAGGCTCTGCAGAAA<br>GCTTATGCCCAATCGGTTT          |
|        | Qiagen    | 213H6       | SI00385413<br>SI00385420<br>SI00385427<br>SI00385434     | CCCGGGCCTGCTCTACCTCAA<br>CCGGCTGACTCTAGCCAAGGA<br>CAGGCCCTGGCTGCCTTCTTA<br>CTGGGCCTGTATGGCACGTCA  |
| FGF22  | Dharmacon | M-013171-00 | D-013171-01<br>D-013171-02<br>D-013171-03<br>D-013171-04 | GAAGAGAACGGCCACAACA<br>GATCCGCTCTGTACACGTG<br>GCTTCTACGTGGCCATGAA<br>GGTCGCGACTCTACACCGT          |
|        | Qiagen    | 128D8       | SI00386981<br>SI00386988<br>SI00386995<br>SI00387002     | CCGGGAGCGCATCGAAGAGAA<br>AGGCTTCTACGTGGCCATGAA<br>GTGGGCGTCGTGGTCATCAGA<br>ATCCTGGAGATCCGCTCTGTA  |
| FGFRL1 | Dharmacon | M-013064-00 | D-013064-01<br>D-013064-02<br>D-013064-03<br>D-013064-04 | GGACACTGAGCCTGAAGAA<br>GAACACGACGGTGGACTTC<br>GGCTGAAGCGCGTGGAGTA<br>ACTCACACGTGGAGGGCAA          |
|        | Qiagen    | 22A8        | SI02661988<br>SI02662527<br>SI03061653<br>SI03086216     | CACCGTGCTGCCAGACCCAAA<br>CTTGGTATTTATATTTAAGAA<br>CACGTGGATGAAGGACGCCAA<br>CGGCCGGAGGACAGCGGCAAA  |
| FIBIN  | Dharmacon | M-031927-00 | D-031927-01<br>D-031927-02<br>D-031927-03<br>D-031927-04 | GAAGAGAGCTATGGCAAGT<br>TGTCAAGGCTACTTCGATG<br>GCAAAAGCATCTCCTACGA<br>ACGAGGACTTTCTGGGAAT          |
|        | Qiagen    | 197B10      | SI00508396<br>SI00508403<br>SI00508410<br>SI00508417     | CAGGTCTACATTATTTAATTA<br>AAGAAGATTAATGATCACTTA<br>CCTGGTCTTCTTAAATTTAAA<br>CAGTGCTATAGTAAATTACAA  |
| FOSL1  | Dharmacon | M-004341-00 | D-004341-01<br>D-004341-02<br>D-004341-03<br>D-004341-04 | GGAGGAAGGAACTGACCGA<br>AGAGGAGCGCCGCGAGTA<br>AGTGGATGGTACAGCCTCA<br>GAGGAGCGCCGCGAGTAA            |
|        | Qiagen    | 53E7        | SI00420420<br>SI00420427<br>SI00420434<br>SI00420441     | CCCACCTAGAACACTAACTCA<br>CCGAGTAAGGCGCGAGCGGAA<br>CACAATTTGCACTAAATCAGA<br>CTGGACAGTATCCCACATCCA  |
| FOSL2  | Dharmacon | M-004110-00 | D-004110-01<br>D-004110-02<br>D-004110-03<br>D-004110-04 | GGCCCAGTGTGCAAGATTA<br>GAAATTCGGGTAGATATG<br>GCTCACCGCAGAAGCAGTA<br>GCAGCTGTCTCCTGAAGAG           |
|        | Qiagen    | 52F11       | SI02780379<br>SI02780421<br>SI03041584<br>SI03090913     | GCGGATCATGTACCAGGATTA<br>TTGGGTTTGCCAAACGCCTAA<br>ACGGCCCAGTGTGCAAGATTA<br>CTCGAACCTCGTCTTCACCTA  |
| FZD2   | Dharmacon | M-005501-01 | D-005501-02<br>D-005501-03<br>D-005501-04<br>D-005501-05 | CGGTCTACATGATCAAATA<br>CATCCTATCTCAGCTACAA<br>CCACGTACTTGGTAGACAT<br>TCAAATACCTCATGACGCT          |
|        | Qiagen    | 71H11       | SI00422975<br>SI00422982<br>SI00422989<br>SI02757433     | CACGTACTTGGTAGACATGCA<br>CACCATGGTGTCCGGTGGCCTA<br>CACGGTGAGACCACCGTGTGA<br>CACGGTCTACATGATCAAATA |
| GABRA3 | Dharmacon | M-006164-00 | D-006164-01<br>D-006164-02<br>D-006164-03<br>D-006164-04 | GAGATAATCCGGTCTAGTA<br>CCAACAAGCTGCTCAGATT<br>GATGAAAGACTGAAATTTG<br>GAACAAATCCGTGGAAGTG          |
|        | Qiagen    | 34G7        | SI00016065<br>SI00016079<br>SI00016086<br>SI03052959     | TACAATGAGGTTAACAATTCA<br>CCCAGTGTGAGACCAAGACCTA<br>CAGAGATAATCCGGTCTAGTA<br>CAACCGGGAGTCACTATCAA  |

| HGNC    | Source    | Pool ID     | siRNA ID                                                 | Sequence                                                                                           |
|---------|-----------|-------------|----------------------------------------------------------|----------------------------------------------------------------------------------------------------|
| GCNT1   | Dharmacon | M-011284-00 | D-011284-01<br>D-011284-02<br>D-011284-03<br>D-011284-04 | GGACACCTGACGACTATAT<br>GAAGCGGTATGAGGTCGTT<br>GAATCCTAGTAGTGATATT<br>CTATAGTGGTTCATCACAA           |
|         | Qiagen    | 95H8        | SI00426132<br>SI00426139<br>SI00426146<br>SI00426153     | CTGCATCTGATTTATATTTAA<br>CACCTGTATATTCATTTGAAA<br>TAGAAAGGTGATAGCATTTAAA<br>TGGGCTTGATTTAACATTTGAA |
| GDF3    | Dharmacon | M-004852-00 | D-004852-01<br>D-004852-02<br>D-004852-03<br>D-004852-04 | GAATATGTCTTTCTCCAAT<br>GCTTTCAGCTTCTCTGTAA<br>GCTAAGGATTGGAATGACA<br>TGGCACAAGTGGATCATTTG          |
|         | Qiagen    | 61A5        | SI00127057<br>SI00127064<br>SI03073952<br>SI03099012     | CCGAGACTTATGCTACGTAAA<br>AAGGAGTGTTCCTTAGGGTAAA<br>CATGCTCTACCAGGACAATAA<br>CTGGGCGTCCGCGGGAATGTA  |
| GFM1    | Dharmacon | M-013685-00 | D-013685-01<br>D-013685-02<br>D-013685-03<br>D-013685-04 | GAGTATGGCTGTCTTTGTA<br>GGAATTAACCGACGCCATG<br>GTCCAGAACTATGCTATTC<br>GTAGGTCGATTTGGACAAT           |
|         | Qiagen    | 165H7       | SI00426804<br>SI00426811<br>SI00426818<br>SI00426825     | CGGGTTGTTTATCATATAATA<br>TAGGTCGATTTGGACAATTA<br>CCCGTTTGACTTTACACATAA<br>CACATGGTTGATTCTAATGAA    |
| GIMAP5  | Dharmacon | M-013342-00 | D-013342-01<br>D-013342-02<br>D-013342-03<br>D-013342-04 | GGAAAGTCTTGGTGGTTGA<br>CCCAAGAGCTGTACAAGAA<br>GGGCAAATATGGAACATATG<br>CCACCGCATTGAGGATTA           |
|         | Qiagen    | 140E11      | SI00427364<br>SI00427371<br>SI00427378<br>SI00427385     | CAGGTGGAGAAGCACAAGCAA<br>CAGAAGATAACTTGTCTGCAA<br>CAGCACATGGCTCCTCCTTAA<br>ATAGATTTCTACTTATTTAA    |
| GNA12   | Dharmacon | M-008435-00 | D-008435-01<br>D-008435-02<br>D-008435-03<br>D-008435-04 | GAGCATGACTTCGTTATTA<br>GGATCGGCCAGCTGAATTA<br>GGGAGTCCGGTGAAGTACTT<br>AGAAGGCGCTGCTGGAGTT          |
|         | Qiagen    | 61F9        | SI00096558<br>SI00096565<br>SI00096572<br>SI03086195     | CCGGATCGGCCAGCTGAATTA<br>GAGGTAGTTGTGCCTCAATTA<br>GTCCGTTTAACTCGATAGAAA<br>CGGCCGCGAGTTTCGACCAGAA  |
| GNAI1   | Dharmacon | M-010404-01 | D-010404-03<br>D-010404-04<br>D-010404-05<br>D-010404-06 | CCACAGATACTAAGAATGT<br>GCAGTGGTCTACAGTAACA<br>CAAATTACATCCCGACTCA<br>GTGGAAAGATAGTGGTGTAA          |
|         | Qiagen    | 23C11       | SI00032256<br>SI00032270<br>SI03087140<br>SI03109414     | ATGGACGATTACACTTAGAAA<br>CTGCATAAGTGTAAATATGCA<br>CGGGCGGATGATGCACGCCAA<br>TACGACCTGGTTCTAGCTGAA   |
| GOLPH3L | Dharmacon | M-006413-00 | D-006413-01<br>D-006413-02<br>D-006413-03<br>D-006413-04 | GCAAAGAACCTAGTAGAGA<br>GCACTGAAATAAGCAAGAA<br>GAATCGAGCCAAGGACTTA<br>GTACTAGAGCGGTGGGTAA           |
|         | Qiagen    | 139D10      | SI00429436<br>SI00429443<br>SI00429450<br>SI00429457     | AAGGGCTAATTTGGTATTGAA<br>TCAGCATTTATTATACTTTAA<br>TAGGGCAAATGTCTAAATGAA<br>CAGCCTTCAATAAATCTTAAA   |
| GPR89A  | Dharmacon | M-005725-00 | D-005725-01<br>D-005725-02<br>D-005725-03<br>D-005725-04 | GGAGATCCCTTTCCCATTC<br>CATAATCACTGAAGTCCTT<br>CCAATTTGATGTGAAGTTT<br>CCAAGGAGAGAATAGAATA           |
|         | Qiagen    | 75B4        | SI00115409<br>SI03065895<br>SI03084354<br>SI03105235     | ACGGAGAACAATGTTCCAGAA<br>CAGCATCATGATTACCTCCCA<br>CGCCATGAGTTTCTGATCGA<br>GCGCCAATTGTTTAAAGACTA    |
| GTF3A   | Dharmacon | M-012635-00 | D-012635-01<br>D-012635-02<br>D-012635-03<br>D-012635-04 | GAAACAAGGGCAAGGCTTA<br>CCATAAAGAGGAAATACTA<br>GCAATGAAACAAAGTCTCA<br>GACCATTTGTTTGTGACTA           |
|         | Qiagen    | 96A4        | SI00432208<br>SI00432215<br>SI00432222<br>SI00432229     | AAGGCTTATCTTTGTGTCAAA<br>CACGAGGGCTATGTATGTCAA<br>ACCCATAAAGAGGAAATACTA<br>AAGGCTGTGGAAGAACCTATA   |

| HGNC      | Source    | Pool ID     | siRNA ID                                                 | Sequence                                                                                         |
|-----------|-----------|-------------|----------------------------------------------------------|--------------------------------------------------------------------------------------------------|
| GUCA2A    | Dharmacon | M-021488-00 | D-021488-01<br>D-021488-02<br>D-021488-03<br>D-021488-04 | GGGCACATGTGAAATCTGT<br>GAAGAAGCTCAAGCCTCTCT<br>GCCCAATGCCAGGAGATA<br>TCACCGTGCAGGATGAAAA         |
|           | Qiagen    | 96D4        | SI00432600<br>SI00432607<br>SI00432614<br>SI00432621     | CAGGGTTGGGAAACTCAGGAA<br>AACCCGAAGCTTCCAGAAGAA<br>CAGCTAATAAACAGATTCCA<br>ACCCATGATACTCCACTCCCA  |
| GZMM      | Dharmacon | M-005892-00 | D-005892-01<br>D-005892-02<br>D-005892-03<br>D-005892-04 | GGTCTGCACTGACATCTTC<br>GGTCTCACCTTCCACATCA<br>GCCCCGTACATGGCCTCACT<br>CGCCTTACGTGTCTGGAT         |
|           | Qiagen    | 13G4        | SI00075726<br>SI00075733<br>SI03087427<br>SI03095477     | CAGGGAGGGACCAATAAATCA<br>CCAATAAATCATAATGAAGAA<br>CGGTCTCACCTTCCACATCAA<br>CTGCGGGAGCTGGACCTCCAA |
| HDAC1     | Dharmacon | M-003493-02 | D-003493-01<br>D-003493-02<br>D-003493-04<br>D-003493-09 | CTAATGAGCTTCCATACAA<br>GAAAGTCTGTTACTACTAC<br>GGACATCGCTGTGAATTGG<br>CCGGTTCATGTCCAAAGTAA        |
|           | Qiagen    | 12E5        | SI00070609<br>SI00070630<br>SI02634149<br>SI02663472     | CACAGCGATGACTACATTA<br>CGGGATTGATGACGAGTCCCTA<br>CCCCTTCTTAACCTTGAACCA<br>CACCCGAGGAAAAGTCTGTTA  |
| HEBP1     | Dharmacon | M-013115-00 | D-013115-01<br>D-013115-02<br>D-013115-03<br>D-013115-04 | GAAGTTGCCTATGAAGAAA<br>GGATGAGGCTCTACGGGAA<br>AATGAGATCTGGCTGTTGA<br>ACAAAAGCGTTAAGATTGA         |
|           | Qiagen    | 131A9       | SI00435260<br>SI00435267<br>SI00435274<br>SI00435281     | CCAGCTGCAAGTCCAACCTAA<br>CAACATGTTGGGCATGATCAA<br>AAGAAGTTGCCTATGAAGAAA<br>TCCAGGCATCTGGGTCACATA |
| HIPK2     | Dharmacon | M-003266-03 | D-003266-06<br>D-003266-07<br>D-003266-08<br>D-003266-09 | GAGAATCACTCCAATCGAA<br>AGACAGGGATTAAGTCAAA<br>GGACAAAGACAAGTAGGTT<br>GCACACACGTCAAATCATG         |
|           | Qiagen    | 87H6        | SI00134330<br>SI00134337<br>SI02659811<br>SI02659818     | CCGAGTCAGTATCCAGCCCAA<br>ACGGGTCGGGACACCGAGTAA<br>AACCAGTACCCTTACATATA<br>TCCCGAAGTCTCCATACTAAA  |
| HIST1H2AE | Dharmacon | M-013146-00 | D-013146-01<br>D-013146-02<br>D-013146-03<br>D-013146-04 | TAAATAAGCTTCTAGGTCG<br>TGGAATATCTGACGGCGGA<br>CGGCAAAGCTCGGGCAAAA<br>TCTTAGAGCTAGCTGGCAA         |
|           | Qiagen    | 96G5        | SI00436940<br>SI00436947<br>SI00436954<br>SI00436961     | GAGGAGCTAAATAAGCTTCTA<br>CAAGGGCAAGTGAAATGATTA<br>ACGGCCGAGATCTTAGAGCTA<br>TCCCGAGTCCCAGAAACCAAA |
| HIST1H2BO | Dharmacon | M-011447-00 | D-011447-01<br>D-011447-02<br>D-011447-03<br>D-011447-04 | CAAAGGCCGTCACCAAGTA<br>GTTACTCTATCTACGTGTA<br>CGAAGGCCATGGGCATCAT<br>CGTAACCAAGGCCAGAAA          |
|           | Qiagen    | 6B7         | SI03084361<br>SI03091298<br>SI03104402<br>SI03104871     | CGCCATGCCCGACCCGGCTAA<br>CTCGCAGCTGCCAGCAATCCA<br>GAGTTACTCTATCTACGTGTA<br>GCCGCAAAGAGAGTTACTCTA |
| HLA-DQB2  | Dharmacon | M-018944-00 | D-018944-01<br>D-018944-02<br>D-018944-03<br>D-018944-04 | GGAGACAGCCGGTGTGTG<br>TCTATAACCGCGAGGAGTA<br>CAACTACGAGGCGGAGCTA<br>TGGAACAACATAAAGGACT          |
|           | Qiagen    | 96E9        | SI00438956<br>SI00438963<br>SI00438970<br>SI00438977     | CAAGAGAAGCATGACAAACAA<br>AAGGATTTCTTGGTCCAGTTT<br>CGAGGACTGGAACAACATAAA<br>TAAACCTGATTCTGAGTTAAA |
| HN1       | Dharmacon | M-021065-00 | D-021065-01<br>D-021065-02<br>D-021065-03<br>D-021065-04 | GAACAACCTGTGAGGAAGA<br>CAAAATGGCCTCTAATATC<br>GAATAGCTCCCAGTTTTG<br>GCAGGTGCCAAGTCTAGTG          |
|           | Qiagen    | 214H7       | SI00439712<br>SI00439719<br>SI00439726<br>SI00439733     | AAGGGAGGCAATCACACTGAA<br>AAGGCTTGGATGTACAATGAA<br>CGGAGACTTCTTAGATCTGAA<br>CTGGACTGTTGCTTCAAGTAA |

| HGNC   | Source    | Pool ID     | siRNA ID                                                 | Sequence                                                                                          |
|--------|-----------|-------------|----------------------------------------------------------|---------------------------------------------------------------------------------------------------|
| HTRA2  | Dharmacon | M-006014-02 | D-006014-03<br>D-006014-04<br>D-006014-05<br>D-006014-06 | GCGCAGAGTCCGTGTGAGA<br>TCGCAGATGTGGTGGAGAA<br>GCTAAGCGGGCGACACGTAT<br>GAGAGTTTCTGCATCGTGG         |
|        | Qiagen    | 14B8        | SI00100877<br>SI00100891<br>SI03042389<br>SI03065496     | AACGCTGAGGATTCAGACTAA<br>CCGCGAGGTCCCTATCTCGAA<br>AGAGTCCGTGTGAGACTGCTA<br>CAGCACCTGCCGTGGTCTATA  |
| INF2   | Dharmacon | M-014097-00 | D-014097-01<br>D-014097-02<br>D-014097-03<br>D-014097-04 | GCGATGTCCTAACCACTGA<br>AAACAAAGAAACTGTGTGT<br>GGAAGAAGCGTCCCTCCAG<br>AGCCGGAAGTTCAAGGCAA          |
|        | Qiagen    | 66C3        | SI00133959<br>SI00133973<br>SI02778615<br>SI02778622     | CAGCGATGTCCTAACCACTGA<br>CAAGATCAGCACATTGCTGAA<br>CCCGGCCTTGATGCTACAACA<br>CCTGATTCTGATGATAATAAA  |
| JMJD6  | Dharmacon | M-010363-01 | D-010363-01<br>D-010363-02<br>D-010363-04<br>D-010363-05 | GAAGTGGGATTCACATCGA<br>GGATAACGATGGCTACTCA<br>GACCAAAGTTATCAAGGAA<br>GGACCCGGCACAACACTACTA        |
|        | Qiagen    | 27F5        | SI00109851<br>SI00109858<br>SI03068037<br>SI03078593     | AAGGAAATATCGGAACCAGAA<br>CTGCTTCCTAAGGATAGATTA<br>CAGCTATGGTGAACACCCTAA<br>CCCGGCGGCCGTGGCGGATAA  |
| KCNIP1 | Dharmacon | M-013559-00 | D-013559-01<br>D-013559-02<br>D-013559-03<br>D-013559-04 | GAAGACACATTCAAGCAGA<br>GGACGGATACATAAACAAA<br>AGGCGACCCTCGAAAAGATA<br>TAACCGCTCTGTCTGATTTT        |
|        | Qiagen    | 32B8        | SI00107100<br>SI00107107<br>SI00107121<br>SI03054359     | CTGGTAGTACAAGTCCTTTAA<br>TGGGATAGGACTGAATTATTA<br>TCCAGAAACGAGGACCAATAA<br>CAAGGACGGATACATAAACAA  |
| KCNK16 | Dharmacon | M-006259-00 | D-006259-01<br>D-006259-02<br>D-006259-03<br>D-006259-04 | CAGCAAGCATTATATCTCA<br>GGTCTTCTGTGTCTTCTAT<br>TGGCAGCAGTTTCTTCTTT<br>GCACAGTTGTCACTACCAT          |
|        | Qiagen    | 32H9        | SI00142079<br>SI03076640<br>SI03100881<br>SI03106775     | AAGGCTCCTCTTACCTCCCAA<br>CCCAGCAAGCATTATATCTCA<br>CTTGAGATTGACAGACAGCAA<br>GTGGACAAGCCTCTTGTTAA   |
| KCNN3  | Dharmacon | M-006270-01 | D-006270-01<br>D-006270-03<br>D-006270-04<br>D-006270-05 | GGACGTAAGTAGTAACCTTT<br>GGAAACATGGTTAATCTAT<br>GAAGATTGACCATGCCAAA<br>GTACACAAGTTCAAGCAGT         |
|        | Qiagen    | 32C4        | SI00035126<br>SI00035133<br>SI00035140<br>SI00035147     | CAGGACGTAAGTAGTAACCTTT<br>CCCATAGGTCTTAAGATGCAA<br>AAGAGAGACCGAGCTAATTA<br>CCGAGCTAATTAACCTAATCA  |
| KCNT2  | Dharmacon | M-027333-00 | D-027333-01<br>D-027333-02<br>D-027333-03<br>D-027333-04 | GAATAGAGCTGAATGATGT<br>GGTCCTCGATACATTATGA<br>CGAGTTATCTACCTTCAAG<br>CGACATAGAGCTCAAACCTG         |
|        | Qiagen    | 32A11       | SI00726075<br>SI00726082<br>SI03034934<br>SI03071957     | CACATAGAGATTAACCAACAA<br>CAGGGTACAAGTTGAATTCTA<br>AAGGATACGCCTGTTCAATTT<br>CAGGTCCTCGATACATTATGA  |
| KEAP1  | Dharmacon | M-012453-00 | D-012453-01<br>D-012453-02<br>D-012453-03<br>D-012453-04 | GGACAAACCGCCTTAATTC<br>CAGCAGAAGTGTACCTGTT<br>GGGCGTGGCTGTCTCAAT<br>CGAATGATCACAGCAATGA           |
|        | Qiagen    | 210F3       | SI00451668<br>SI00451675<br>SI00451689<br>SI03246439     | GCGAATGATCACAGCAATGAA<br>CCGGGAGTACATCTACATGCA<br>CTGCATCAACTGGGTCAAGTA<br>CCAGGATGCCTCAGTGTAA    |
| KERA   | Dharmacon | M-012764-00 | D-012764-01<br>D-012764-02<br>D-012764-03<br>D-012764-04 | GAGAATGCCACCCAGCTAA<br>CCAAGAAGTTTAGAACAAAT<br>AAGAATGCCCTGAGGAATA<br>CATCAATTCTAGATCTTCA         |
|        | Qiagen    | 120A8       | SI00451752<br>SI00451759<br>SI00451766<br>SI00451773     | CAGTATAAATGTAATAATCAA<br>ATGGATAAATCTAAACAAGAA<br>AACAAATTACATTCTTATACAA<br>AAGATAGTTTATCAACTCAAA |

| HGNC     | Source    | Pool ID     | siRNA ID                                                 | Sequence                                                                                          |
|----------|-----------|-------------|----------------------------------------------------------|---------------------------------------------------------------------------------------------------|
| KIAA1026 | Dharmacon | M-022166-00 | D-022166-01<br>D-022166-02<br>D-022166-03<br>D-022166-04 | GAGCGAGGATGCGGTCAAA<br>GCCAAACAGTCTTAGCTA<br>GCGAGACGGTGCTCAATGG<br>GCTGATCGGAAGCGCTTAA           |
|          | Qiagen    | 199D11      | SI00416052<br>SI00416059<br>SI00416066<br>SI00416073     | CAGGGACATCGTGAGGATTAA<br>CACAGAAATGATATAGAGCTA<br>CCCATTTCATGATGACTAT<br>CTGGAGGTCACCAACGTGTAA    |
| KIAA1407 | Dharmacon | M-014068-00 | D-014068-01<br>D-014068-02<br>D-014068-03<br>D-014068-04 | GAAGGTACCACGAGCTATA<br>GGAAACGGTTCACAAGGAA<br>GATGAGACATAAGCAGGTA<br>GAGTATAACCGGAAACAAG          |
|          | Qiagen    | 147D3       | SI00458500<br>SI00458507<br>SI00458514<br>SI00458521     | CTGGTTAGACACCAAACTTAA<br>ATGAATTGTGTTAGAGAATTA<br>CACATTTATTATATAACAAAT<br>CTGGAGTACCAGAGAATAGAA  |
| KIAA1529 | Dharmacon | M-026179-00 | D-026179-01<br>D-026179-02<br>D-026179-03<br>D-026179-04 | GAAGGAAGCTGCCCGGATA<br>GAAATGGAGTCCTTCATAA<br>TGAAAGAAGTCAACTCCTA<br>ACAATTCCATCGAGACTAA          |
|          | Qiagen    | 147A7       | SI00459172<br>SI00459179<br>SI00459186<br>SI00459193     | CAGCATGATTAGGATGAACAA<br>CAGGTGGGAAAGGAAATGGAA<br>CAGGATACCCATGATGAAGAA<br>CAGGAAGAGCAAGAGAGTTTA  |
| KIAA1604 | Dharmacon | M-023101-00 | D-023101-01<br>D-023101-02<br>D-023101-03<br>D-023101-04 | GGAATGTGGCCTCAAATTA<br>AAATTAACCTGGTCTCATT<br>CTTATTAGCTGGGCGATTT<br>GAAACAAACAAGTTGCGAA          |
|          | Qiagen    | 147D9       | SI00459704<br>SI00459711<br>SI00459718<br>SI00459725     | CAGGAACAGATTACAGATAAA<br>CAGCAAACAATGATAGGAAA<br>CAGAAGTAAAGAGGTAGATAA<br>ATGGAGTTTCTGAAAGCCAA    |
| KIAA1622 | Dharmacon | M-013007-00 | D-013007-01<br>D-013007-02<br>D-013007-03<br>D-013007-04 | GAACAAGTGTGATTGCAAA<br>TGAAAGGGCTGTTTATCTG<br>GATTGACAGTCGATGAAGA<br>GCGATGGATTTTCAGTCAGA         |
|          | Qiagen    | 217B10      | SI00459872<br>SI00459879<br>SI00459886<br>SI00459893     | AAGGAACAAGTGTGATTGCAA<br>ACCGGAAGAAATAGAAAGATT<br>CGCGATGGATTTTCAGTCAGAA<br>CTGGTCAAGATGTCCAAGGAA |
| KIF11    | Dharmacon | M-003317-01 | D-003317-05<br>D-003317-06<br>D-003317-07<br>D-003317-08 | GCAGAAATCTAAGGATATA<br>CAACAAGGATGAAGTCTAT<br>CAGCAGAAATCTAAGGATA<br>CTAGATGGCTTTCTCAGTA          |
|          | Qiagen    | 42F7        | SI00064855<br>SI02653693<br>SI02653770<br>SI03104038     | CTAGATGGCTTTCTCAGTATA<br>ACGGAGGAGATAGAACGTTTA<br>GCCGATAAGATAGAAGATCAA<br>GAGGGCGTACAAGAACATCTA  |
| KIF12    | Dharmacon | M-008252-01 | D-008252-01<br>D-008252-03<br>D-008252-05<br>D-008252-06 | ACAGCAAGCTCACCAAGTT<br>GATCTACAATGAGCAGGTT<br>TGGCAGAGATGTTGACGGA<br>GGTCTCAGCCGTCGAAGGA          |
|          | Qiagen    | 43E2        | SI00150794<br>SI00150801<br>SI00150808<br>SI00150815     | ACCCTTTACATCAGCCGTCAA<br>CGCCTCTTATCTGGAGATCTA<br>ACAGGAGTTCATGCTAGAGAA<br>AAGAGAGGCATCAGCTCCAAA  |
| KIF13A   | Dharmacon | M-008257-01 | D-008257-02<br>D-008257-04<br>D-008257-05<br>D-008257-06 | GTGATGATATGGATAGTTA<br>GAACCATGCTGTTGTGAAT<br>AGACGTACATTGAGAAGTA<br>GCAAATTTGTGCCTTATCG          |
|          | Qiagen    | 42E11       | SI00462322<br>SI00462329<br>SI03031133<br>SI03071530     | AACCTATGAAATAGTATCCAA<br>CCGGCAGCCGTCACAGTCAA<br>AAGAAGTGTCCCGTAGCCCTA<br>CAGGGTCATTCCCGTAGAGTA   |
| KIF15    | Dharmacon | M-004960-00 | D-004960-01<br>D-004960-02<br>D-004960-03<br>D-004960-04 | GAAGAGAGCTTGCTTGCTA<br>GGACATAAATTGCAAATAC<br>GGGAAGACATTTACTATGA<br>AATCAGAGCTTCAGTCTTT          |
|          | Qiagen    | 21C11       | SI00125615<br>SI02643914<br>SI03029390<br>SI03102386     | CAGGATTCCTATGACAACCTTA<br>TTGAGATTGACCAACTTTCAA<br>AACGAGCAGATATATGATCTA<br>GACGTGTGGCATCAACATCAA |

| HGNC   | Source    | Pool ID     | siRNA ID                                                 | Sequence                                                                                          |
|--------|-----------|-------------|----------------------------------------------------------|---------------------------------------------------------------------------------------------------|
| KIF20A | Dharmacon | M-004957-01 | D-004957-01<br>D-004957-02<br>D-004957-03<br>D-004957-05 | GCAAGAACCTGCTATCAGA<br>GAAGAGGGCCAGAAGAATA<br>GCAATGAGATGGTAGAACAA<br>CTGAAGAGTTGCATAAGTA         |
|        | Qiagen    | 42C9        | SI02654064<br>SI03019828<br>SI03060015<br>SI03118976     | AACGAACTGCTTTATGACCTA<br>ACCACTTGTGATGACATCTTA<br>CACGATTC AAGGTACCATCAA<br>TGCGGCTATGCGAGGATCAAA |
| KIF23  | Dharmacon | M-004956-01 | D-004956-01<br>D-004956-02<br>D-004956-04<br>D-004956-05 | CGACATAACTTACGACAAA<br>GACATGATCTTTAACAGTA<br>GAACAAATCACTATAAGTC<br>GCATAGAAGTGATCAATAA          |
|        | Qiagen    | 42A9        | SI02653483<br>SI02653910<br>SI03026121<br>SI03060050     | AAGGCTGAAGATTATGAAGAA<br>CAGAAGTTGAAGTGAAATCTA<br>AAACGACATAACTTACGACAA<br>CACGCACAACCCAAGCGCAAA  |
| KLK1   | Dharmacon | M-005906-00 | D-005906-01<br>D-005906-02<br>D-005906-03<br>D-005906-04 | TCAGAGTGCTGTCTTATGT<br>CAACTTGTTTGACGACGAA<br>AGGCGGCTCTGTACCATTT<br>TGACAGAGCCTGCTGATAC          |
|        | Qiagen    | 13F5        | SI00035329<br>SI03055360<br>SI03089583<br>SI03097003     | CGCCGTCAGAGTGCTGTCTTA<br>CACAACCTGTTTGACGACGAA<br>CTCCAGTGTGTGGACCTCAA<br>CTGGAGAACCACACCCGCCAA   |
| LEPROT | Dharmacon | M-032248-00 | D-032248-01<br>D-032248-02<br>D-032248-03<br>D-032248-04 | GTCGGGAACCTGGCATATTT<br>CCAAAAGAGTCACCTATGA<br>CTACTGGAATTGTTGTTTC<br>CCTTATATTTGGAAGAGGA         |
|        | Qiagen    | 1G11        | SI00118608<br>SI00118615<br>SI00118622<br>SI03113831     | CTGGCCCTTATTTCGTCTGAT<br>ATGGCGTTTACTGGCCCTTAT<br>AAGCATCATCATAGAGAAGTA<br>TCCAGTGGCTAAACCCTTAA   |
| LILRB1 | Dharmacon | M-017168-00 | D-017168-01<br>D-017168-02<br>D-017168-03<br>D-017168-04 | TCACAGAGCTCCAAACCTT<br>CGGTATCGCTGTTACTATG<br>GATCAACGTACCAATCTCA<br>GCACACACAGCCTGAGGAT          |
|        | Qiagen    | 119G5       | SI00090937<br>SI00090951<br>SI02657200<br>SI02657207     | CAGAAAGTGCATTAACCTGAA<br>ACCCATGGCGTCTAAGATCAA<br>ATGAATGAATTAGGAAAGAAA<br>CACAATGTAAATATTACACAT  |
| MAGED1 | Dharmacon | M-006682-00 | D-006682-01<br>D-006682-02<br>D-006682-03<br>D-006682-04 | GAAGACAGCGCCTTGCTTA<br>GGAAAGAGCAAATAAGTTG<br>TAAGGAAACTTCTCACCTA<br>GGGATGACATTGAGTTTGA          |
|        | Qiagen    | 22F4        | SI00020384<br>SI00020391<br>SI00020405<br>SI03048857     | TAGGCCTAAGTCAGCCTTTAA<br>CTCCTTGGAGATCTAAGGAAA<br>CTGAGAGATATCATCCGTGAA<br>ATCTGGAGTCCCGGACAATAA  |
| MAGEE1 | Dharmacon | M-014189-00 | D-014189-01<br>D-014189-02<br>D-014189-03<br>D-014189-04 | GGACAGAAGTACTGGTACT<br>GATCAGAGCAAGTACCCTA<br>GCACATTGTTTAGCTCTAG<br>TATAGACAGTTTACGGGTT          |
|        | Qiagen    | 147E8       | SI00626955<br>SI00626962<br>SI00626969<br>SI00626976     | CGGGAATATATTGTTAAAGAA<br>CAGCGCTATATAGACAGTTTA<br>TAGCATATAGCTATAGATATA<br>TAGCTTAAAGTGATAAACTAA  |
| MAGEE2 | Dharmacon | M-015813-00 | D-015813-01<br>D-015813-02<br>D-015813-03<br>D-015813-04 | GAGACCCACTCAAGAATAT<br>CCAGATCACCGATAGGATA<br>CGATTGCTTTGGTGAATTT<br>AGAAGTGGCCAGAACAATA          |
|        | Qiagen    | 177A3       | SI00626983<br>SI00626990<br>SI00626997<br>SI00627004     | TAGGTTAATGACCAATATTTA<br>CAGGCTGACACCTACAATTTA<br>CCGGTCTTGTTCAGCATAAA<br>CAGCTGAGTGGCATAAGTTAA   |
| MAGEH1 | Dharmacon | M-009135-00 | D-009135-01<br>D-009135-02<br>D-009135-03<br>D-009135-04 | GAGGGTACCTGATTTATAA<br>CGAAGAAGATCGTCACAGA<br>GCAGTCCGGTGGAGTATGA<br>GGACGATGATGCAGAGGTT          |
|        | Qiagen    | 129G10      | SI00627039<br>SI00627046<br>SI00627053<br>SI00627060     | CAGAGGGTACCTGATTTATAA<br>CAGCAGCTTCTTACGGTATAA<br>CGGCTTGTTFATTGCTACAAA<br>CCGAAGAAGATCGTCACAGAA  |

| HGNC     | Source    | Pool ID     | siRNA ID                                                 | Sequence                                                                                           |
|----------|-----------|-------------|----------------------------------------------------------|----------------------------------------------------------------------------------------------------|
| MAGI1    | Dharmacon | M-011922-00 | D-011922-01<br>D-011922-02<br>D-011922-03<br>D-011922-04 | GGACGTGGCTTCAAATAGT<br>GGAAAGTGATCACGACGGGA<br>GAAAGAAGGGGATCTCATA<br>GGGATAACCTTTACCGCCA          |
|          | Qiagen    | 112A5       | SI00310149<br>SI00310156<br>SI00310163<br>SI00310170     | AAGGAATACCACCAAACCAAA<br>CAAATGGGTTATAATATGTTA<br>TCGCTTGTCTGAAATCTCTA<br>GAGGATAATTTAGGTCTCTA     |
| MAST1    | Dharmacon | M-004672-01 | D-004672-01<br>D-004672-03<br>D-004672-04<br>D-004672-05 | CGACAGGAGTCACCTTTGA<br>GACACTAGCTACTTTGACA<br>GAGCCTCACCACCAACTTA<br>ACATCAAGCTCACAGATTT           |
|          | Qiagen    | 89G8        | SI00628173<br>SI03058251<br>SI03061233<br>SI03115161     | CCCGAGGTCACTCCTGCGTCAA<br>CACCGAGAGCATCACAGACGA<br>CACGGTCTACTTCTATGAATT<br>TCCGCGCTTCAGCAAGGTGTA  |
| MAX      | Dharmacon | M-010092-02 | D-010092-04<br>D-010092-05<br>D-010092-06<br>D-010092-07 | CGAGGTGGAGAGCGACGAA<br>GACAAACGGGCTCATCATA<br>GTAGGGACCACATCAAAGA<br>TTTCACAGTTTGCGGGACT           |
|          | Qiagen    | 49B4        | SI03026177<br>SI03093027<br>SI03111451<br>SI03116995     | AAACGTAGGGACCACATCAAA<br>CTGACAAACGGGCTCATCATA<br>TAGGAAATGAGCGATAACGAT<br>TCGGCTTGTGTGTGTCGGTGA   |
| MC1R     | Dharmacon | M-005657-01 | D-005657-01<br>D-005657-02<br>D-005657-03<br>D-005657-05 | CAAAGAGGATGGACTAAAT<br>GATATTGTGTGGTCTGGTT<br>GGGAAGCTCCGACTCCTA<br>TGGCTATGCTGGTGCTCAT            |
|          | Qiagen    | 72F11       | SI00036946<br>SI00036953<br>SI00036960<br>SI03050684     | CCAGGAAAGTCTGGTAATAAAA<br>CACCAGGGCTTTGGCCTTAAA<br>CACGCTCTTCATCGCCTACTA<br>ATGGACTAAATGATCTCTGAA  |
| MFAP1    | Dharmacon | M-020071-00 | D-020071-01<br>D-020071-02<br>D-020071-03<br>D-020071-04 | GGAGAAAGCAGAAAATTGAA<br>GCTCAGGTTCGACCAAATA<br>AAGTGAAGGTAAAGCGTTA<br>TATGAGGCATGGAAAAGTTC         |
|          | Qiagen    | 99A6        | SI00630651<br>SI00630658<br>SI00630665<br>SI00630672     | TAGCATGATACTGGAAATAAAA<br>CTGGAGGATCATTTCAATAAAA<br>AAGGAGAAAGCAGAAATTGAA<br>AAGGTGAGATTTCAATGGAAA |
| MGAT5    | Dharmacon | M-011334-00 | D-011334-01<br>D-011334-02<br>D-011334-03<br>D-011334-04 | GTACTGAACCCGAATTTAA<br>CAAATTATGCCCAATCGAA<br>CCGAGTCCTTGATTCATTT<br>AACCTTGCTGTGTATTATA           |
|          | Qiagen    | 99F6        | SI00631099<br>SI00631106<br>SI00631113<br>SI00631120     | TACAATAATTATACATAATAA<br>CTCATTTACATTGATATTGTA<br>CTGGAAGAATAAGAAGATCTA<br>TAGCTAGAATTTATAATTTAT   |
| MGC29891 | Dharmacon | M-016074-00 | D-016074-01<br>D-016074-02<br>D-016074-03<br>D-016074-04 | GAAGAGAAGTTGCCACTAA<br>AGAATCAGGTGAATGTAA<br>GGCCAGCCATTTATTGTAA<br>GTTAACCTCGCAAGCCTTA            |
|          | Qiagen    | 173C10      | SI00637483<br>SI00637490<br>SI00637497<br>SI00637504     | AAGGAAATATACAGAAGACAA<br>CACCAATATATATGCCTTTAA<br>CTGGGTAATATCCAAACTTCA<br>AAGACTGTATCTCAAAGGAAA   |
| MID1IP1  | Dharmacon | M-015884-00 | D-015884-01<br>D-015884-02<br>D-015884-03<br>D-015884-04 | CAGAAGCACTCGCTCTTTA<br>GAGATCGGCTTCGGCAATT<br>GCAAATCTGCGACACCTAC<br>TCTCGAAACTCACGCGCAA           |
|          | Qiagen    | 148D6       | SI00645659<br>SI00645666<br>SI00645673<br>SI00645680     | CCAGATGTAGACTATATTCTA<br>TCGGTAATCGGTACTACTTTA<br>CAGCCACTACGTGCTTCTCAA<br>CTCGCTCTTTAACGCCATGAA   |
| MLN      | Dharmacon | M-012641-00 | D-012641-01<br>D-012641-02<br>D-012641-03<br>D-012641-04 | AGAAATCCCTGAGTGTATG<br>GGAACGGAATAAAGGGCAA<br>GGAATGAGGATGAACTCCA<br>GACTGCTCCTCTGGAAATT           |
|          | Qiagen    | 24A2        | SI00037422<br>SI00037429<br>SI02628521<br>SI03036922     | CTCCAAGATGGTATCCCCTAA<br>CAGCCGGACACCAGAAGACAA<br>AAGGAACGGAATAAAGGGCAA<br>AAGTGAGGCCCTGGGAATTTA   |

| HGNC   | Source    | Pool ID     | siRNA ID                                                 | Sequence                                                                                          |
|--------|-----------|-------------|----------------------------------------------------------|---------------------------------------------------------------------------------------------------|
| MSL3L1 | Dharmacon | M-012319-00 | D-012319-01<br>D-012319-02<br>D-012319-03<br>D-012319-04 | GCGCAAAGCTGAGCCAGAA<br>CAGCGTAAATTGGCAAGAA<br>GGTGTGGACTCTGTCTTAA<br>AAAGGTGACTTCGTCTAAA          |
|        | Qiagen    | 211E8       | SI00650307<br>SI00650314<br>SI00650321<br>SI00650328     | CAGGAGGAAAACGGTTAGTGAA<br>ACAGCGTAAATTGGCAAGAAA<br>CTGGTGTGGACTCTGTCTTAA<br>CAGAAGCATTGCAGTCTCTGA |
| MSTN   | Dharmacon | M-012039-00 | D-012039-01<br>D-012039-02<br>D-012039-03<br>D-012039-04 | ACAAAGATGTCTCCAATTA<br>GGAAACAGCTCCTAACATC<br>CAACTTAGGCATTGAAATA<br>GCATGTACTTGGAGACAAA          |
|        | Qiagen    | 23A10       | SI00074627<br>SI00074634<br>SI00074641<br>SI00074648     | CTGATGCTATCTCAACAATA<br>ACGGTACAAGGTATACTGGAA<br>AGGAGTATGCTTTAAAGTCTA<br>CTCAGTAAACTTCGTCTGGAA   |
| MT3    | Dharmacon | M-012728-00 | D-012728-01<br>D-012728-02<br>D-012728-03<br>D-012728-04 | CAAGTGCAGGGATGCAAAA<br>GAAGTGTGCCAAGGACTGT<br>GTGCAAAGGCGGAGAGGCA<br>AGGCAGAAGCAGAGAAGTG          |
|        | Qiagen    | 99B9        | SI00650727<br>SI00650734<br>SI00650741<br>SI00650748     | ACCTTGGAGGAATGACAATA<br>CAGGTGGCTCAGTGCCACCTA<br>CGCGTCCAGTTGCTTGGAGAA<br>CTGCAAGTGCAGGGATGCAA    |
| MYH9   | Dharmacon | M-007668-00 | D-007668-01<br>D-007668-02<br>D-007668-03<br>D-007668-04 | GAAGTCAGCTCCCTAAAGA<br>GCACAGAGCTGGCCGACAA<br>GGCCAAACCTGCCGAATA<br>GAACATGGCCCTCAAGAAG           |
|        | Qiagen    | 42F3        | SI00038346<br>SI00038353<br>SI00038360<br>SI02654911     | TCGGAGCACAAGCGCAAGAAA<br>CACGGAGATGGAGGACCTTAT<br>AACCGGGACGAAGCCATCAAA<br>CAGGAGCAGTCCAGGCAGAA   |
| NANS   | Dharmacon | M-013399-00 | D-013399-01<br>D-013399-02<br>D-013399-03<br>D-013399-04 | TGAAACAGGCATAGCGATA<br>GGTAGATAATCATGGCAAAA<br>GGTGTGGAACGTCACATA<br>CCGGAAGGCACCATTCTAA          |
|        | Qiagen    | 135A7       | SI00654843<br>SI00654850<br>SI00654857<br>SI00654864     | TAGGGTATTCTGGGCATGAAA<br>TTGGTAGATAATCATGGCAAAA<br>ATGGATGAGATGGCAGTTGAA<br>TGAGCTAGAATTCAAGTTTAA |
| NCR1   | Dharmacon | M-020866-00 | D-020866-01<br>D-020866-02<br>D-020866-03<br>D-020866-04 | GGAGAAGGCTGAACACACA<br>AGACGGGACTCCAGAAAAGA<br>GGTGGTAACAGAAATGTAT<br>GTACAGCGCGGATACGGGA         |
|        | Qiagen    | 40G11       | SI00068908<br>SI00068915<br>SI00068929<br>SI03093475     | TCGGTTCATCCTGGACCCGAA<br>AAGCATGTTCTTACTGCTCAA<br>CTGGATCTGGTGGTAACAGAA<br>CTGAGCGGATTAACAAAAGTCA |
| NDC80  | Dharmacon | M-004106-00 | D-004106-01<br>D-004106-02<br>D-004106-03<br>D-004106-04 | GAAGAAAGCTACTCTAATT<br>GCGAATAAATCATGAAAGA<br>GAAGATGGAATTATGCATA<br>GAGTAGAACTAGAATGTGA          |
|        | Qiagen    | 39F5        | SI00084539<br>SI02653224<br>SI02653567<br>SI03067442     | CACAATTAGCAGAGTATCACA<br>CCGAGACCACTTAATGACAAA<br>TCCCTGGGTCTGTTCAGGAAA<br>CAGCGGAATACCAACTAGTT   |
| NDUFA7 | Dharmacon | M-012693-00 | D-012693-01<br>D-012693-02<br>D-012693-03<br>D-012693-04 | GGACCAGCCTTACCTGTGA<br>GGTCCTAGCCACAAGCTCT<br>CCATAAAGAGGTGGGAGCT<br>TCATCATGTCGTCTGCAGAA         |
|        | Qiagen    | 100F4       | SI00656495<br>SI00656502<br>SI00656509<br>SI00656516     | CAGGGAGAATGTGACCTAATT<br>TAGCCACAAGCTCTCCAACAA<br>ACCAGGAGATCTCCAAGCGAA<br>CATCATCATGTCGTCTGCAGAA |
| NEDD4  | Dharmacon | M-007178-01 | D-007178-02<br>D-007178-03<br>D-007178-04<br>D-007178-05 | GGAGAGACCATATACATTT<br>GGGATTCTTTGAACTAATA<br>GGAGGGAACATACAAAAGTA<br>TAGCTGGAATGGCAGTTTA         |
|        | Qiagen    | 10C6        | SI03051419<br>SI03062843<br>SI03648925<br>SI03649072     | ATGGCGATTTGTAAACCGAAT<br>CAGAACGACTACTTGGACAAA<br>ATGGAGTTGATTAGATTACAA<br>CCGGAAGATTATGGGTGTCAA  |



| HGNC   | Source    | Pool ID     | siRNA ID                                                 | Sequence                                                                                          |
|--------|-----------|-------------|----------------------------------------------------------|---------------------------------------------------------------------------------------------------|
| NEDD8  | Dharmacon | M-020081-00 | D-020081-01<br>D-020081-02<br>D-020081-03<br>D-020081-04 | GAAAGGAGATTGAGATTGA<br>AGATTGAGATTGACATTGA<br>CAGACAAGGTGGAGCGAAT<br>GGAGATTGAGATTGACATT          |
|        | Qiagen    | 15H9        | SI00657335<br>SI00657349<br>SI00657356<br>SI03102827     | CTGGAAAGAAGATGCTAATTA<br>CTCATAATGAGGCATCATATA<br>AGCGGTAGGAGCAGCAATTTA<br>GAGATTGACATTGAACCTACA  |
| NFIA   | Dharmacon | M-008661-00 | D-008661-01<br>D-008661-02<br>D-008661-03<br>D-008661-04 | GAAAGAATTTGTCCAACCTT<br>GGAAAGTTCTTCATACTAC<br>CAAGTGACGCTGACATTAA<br>GGCAAGATGCGAAGAATTG         |
|        | Qiagen    | 100A8       | SI00657979<br>SI00657986<br>SI00657993<br>SI00658000     | AAGGATGAATTGCTAAGTGAA<br>CAGATTCAAGTCAATCTGAAA<br>ACCGATTCAAATCAACTTGTA<br>CAGCAGTTAAGTATATAACAT  |
| NGFR   | Dharmacon | M-009340-01 | D-009340-03<br>D-009340-04<br>D-009340-05<br>D-009340-06 | CTACCAGCCCGAGCACATA<br>TCCAGAACAAGACCTCATA<br>GCGAGGACACCGAGCGCCA<br>CGTATTCCGACGAGGCCAA          |
|        | Qiagen    | 39A7        | SI00038703<br>SI02628731<br>SI03056151<br>SI03080119     | ATGGCAATTTCTTTGACCTCAA<br>AACGTTAAGTGATGAACATTA<br>CACAGCGGTGAGTGCTGCAAA<br>CCGAGCACATAGACTCCTTTA |
| NHP2L1 | Dharmacon | M-019900-00 | D-019900-01<br>D-019900-02<br>D-019900-03<br>D-019900-04 | GAATGTGCCCTACGTGTTT<br>TTGAAAGGCTCTTAGTCTA<br>GACTGAGGCTGATGTGAAT<br>CAGCAGATCCAATCCATTC          |
|        | Qiagen    | 206D3       | SI00658539<br>SI00658546<br>SI00658553<br>SI00658560     | CAGCTACTCTCTATTGTTATA<br>CAGGGTGGTGGCACCGTTGAA<br>CTGAGGTTGTGTATCATATTA<br>AACAGAGATGGTGGAGTCCAA  |
| NINJ2  | Dharmacon | M-020844-00 | D-020844-01<br>D-020844-02<br>D-020844-03<br>D-020844-04 | CAACGCAGCCACCATTG<br>GAAAAGCAGTGGCGACTCA<br>GAGAAAACATCGACCTTCA<br>GACCATCCTCTCACTACTA            |
|        | Qiagen    | 100A10      | SI00658882<br>SI00658889<br>SI00658896<br>SI03246460     | ACGCAGGTACTGCCAGCCATA<br>CTGAACCTGAATGAGGTAGAA<br>TACCCACAGCACCTGAGTTAA<br>AATGGAATCTATATCTATAAA  |
| NKD2   | Dharmacon | M-018641-00 | D-018641-01<br>D-018641-02<br>D-018641-03<br>D-018641-04 | GAACTACACGTCCAGATTC<br>GGGCAGCGCCTCAACATTG<br>GCAAGACCCTCCGTGTGAA<br>GGACGTTACGCTCTATGA           |
|        | Qiagen    | 22C4        | SI00145453<br>SI00145460<br>SI00145467<br>SI03062122     | CAGCCTCATGCACACCATCTA<br>CACGGAGCGCAGAAACCACTA<br>CACGCTCTATGACTTTGACAA<br>CACTATGTTTTCTGGCTCTAA  |
| NOS3   | Dharmacon | M-006490-00 | D-006490-01<br>D-006490-02<br>D-006490-03<br>D-006490-04 | TGAAGCACCTGGAGAATGA<br>CGGAACAGCACAAAGATTA<br>CGAGGAGACTTCCGAATCT<br>AGGAGATGGTCAACTATTT          |
|        | Qiagen    | 44D7        | SI00012677<br>SI03061674<br>SI03082464<br>SI03114748     | TCAGGAGTATCTTACCTGTAA<br>CACGTGGCTAAGCCAGCTCAA<br>CCGGGACTTCATCAACCAGTA<br>TCCCTGGTATTTCCACGAAA   |
| NOX4   | Dharmacon | M-010194-00 | D-010194-01<br>D-010194-02<br>D-010194-03<br>D-010194-04 | GAATTACAGTGAAGACTTT<br>CAGGAGGGCTGCTGAAGTA<br>GGGCTAGGATTGTGTCTAA<br>GATCACAGCCTCTACATAT          |
|        | Qiagen    | 30F3        | SI00117642<br>SI00117649<br>SI02642500<br>SI02642507     | TCCATTTGCATCAATACTCAA<br>CAAGATGACCGTCACATTACA<br>AACCAGGAGATTGTTGGATAA<br>CAGCATCTGTTCTTAACCTCA  |
| NR2F6  | Dharmacon | M-003423-00 | D-003423-01<br>D-003423-02<br>D-003423-03<br>D-003423-04 | CGACGCCTGTGGCCTCTCA<br>CAGCCGGTGTCCGAACCTGA<br>CAACCGTGACTGCCAGATC<br>GTACTGCCGTCTCAAGAAG         |
|        | Qiagen    | 48B7        | SI00074172<br>SI00074179<br>SI00074186<br>SI03085320     | AAGGCCAATAATAAAGACATT<br>ATGACTCAAGGCCAATAATAA<br>CAGACACTACATGATGACTCA<br>CGCGGTGCTGGGCATCGACAA  |

| HGNC    | Source    | Pool ID     | siRNA ID                                                 | Sequence                                                                                            |
|---------|-----------|-------------|----------------------------------------------------------|-----------------------------------------------------------------------------------------------------|
| NSUN4   | Dharmacon | M-027291-00 | D-027291-01<br>D-027291-02<br>D-027291-03<br>D-027291-04 | ACACTAGCGTTGCTTCAGA<br>CCGCGGAGACATCGATATA<br>GACCGCCACTCCCTTCATG<br>ATGGTGCACCTGGTCAATAA           |
|         | Qiagen    | 70D4        | SI00661892<br>SI02779588<br>SI03083486<br>SI03114377     | CTGGAATATTCACATAATAGA<br>TACGTATGTCCTGGCTTGATTA<br>CCTGGGTGTCATGGAGTACTA<br>TCCCGCGGAGACATCGATATA   |
| NUCB1   | Dharmacon | M-015822-00 | D-015822-01<br>D-015822-02<br>D-015822-03<br>D-015822-04 | CGAGCAGGATCCCAATGTA<br>GGTCATCGATGTACTGGAG<br>CGACGCAGCCCATCATGAA<br>GAACCAGCATAACATTCGAG           |
|         | Qiagen    | 101G2       | SI00662403<br>SI00662410<br>SI00662417<br>SI00662424     | CTGCATGATATCAACAGTGAT<br>CTCAGTGATCGGCTTAACTTA<br>CCGCGAGCACCCCTAAAGTCAA<br>CTGGATGAAGTGGCACAGTCA   |
| NUF2    | Dharmacon | M-005289-01 | D-005289-02<br>D-005289-03<br>D-005289-04<br>D-005289-05 | GAACGAGTAACCACAATTA<br>GGACTCCTATGCTAAGATA<br>GAATTCGACTGGAACATTT<br>TAGCTGAGATTGTGATTCA            |
|         | Qiagen    | 61D4        | SI00140630<br>SI00140637<br>SI00140644<br>SI03032141     | CAGGAGCTACAACAATCACTA<br>CACAGTAATTGAGGATTGCAA<br>AAGCATGCCGTGAAACGTATA<br>AAGATACGGTCCAGAAGCTTA    |
| NUMBL   | Dharmacon | M-012682-00 | D-012682-01<br>D-012682-02<br>D-012682-03<br>D-012682-04 | CAGAAGAACTCGCCTTTCA<br>GCACTGACTTCCAGGTGAA<br>GCAAAGCCACTGTAGAGAA<br>CCAAGGATCTTCTGGTCTGA           |
|         | Qiagen    | 112F5       | SI00662879<br>SI00662886<br>SI00662893<br>SI00662900     | CCGCACTGACTTCCAGGTGAA<br>AACTTGAAGATTTGTATTATA<br>GCCAATAAAGGAAGAATATAA<br>CCAGAAGAACTCGCCTTTCAA    |
| NXF1    | Dharmacon | M-013680-00 | D-013680-01<br>D-013680-02<br>D-013680-03<br>D-013680-04 | CGAGATCGCATTTCATGTTA<br>GCACACGCGTCTCAACGTT<br>GGCTATGTATTGTAAATGA<br>GCCAACGATTTCCCAAGTT           |
|         | Qiagen    | 117C9       | SI00663495<br>SI00663502<br>SI00663509<br>SI00663516     | CAGAACAAGTAGAACAGCTAA<br>AACGCGTTAATTTCCCTCAAA<br>CCGAAGGATATCTATCATCAT<br>CGCGAACGATTTCCCAAGTTA    |
| ORC4L   | Dharmacon | M-003286-02 | D-003286-06<br>D-003286-07<br>D-003286-08<br>D-003286-09 | GAAAGCACATTCGGTTTAT<br>TGAAAGAACTCATGGAAAT<br>GCTGAGAAGTGGAATGAAA<br>CCAGTGATCTTCATATTAG            |
|         | Qiagen    | 206G4       | SI00675031<br>SI00675038<br>SI00675045<br>SI00675052     | CAGAAGTTTGTTCAAAGGAAA<br>AAGCATTTCAATATCAGCAA<br>CCGGCAGATACACTTAATGAA<br>AAGGGTGGTCTCATAAGATTA     |
| PAX2    | Dharmacon | M-003921-01 | D-003921-01<br>D-003921-03<br>D-003921-04<br>D-003921-05 | GAAGTCAAGTCGAGTCTAT<br>GGACAAGATTGCTGAATAC<br>CATCAGAGCACATCAAATC<br>CGACAGAACCCGACTATGT            |
|         | Qiagen    | 57E9        | SI00006083<br>SI00006090<br>SI00006104<br>SI03077508     | CACAGCTACACGCCCATTTAAA<br>CCCGTAGTTGCTCTTTCCGGTA<br>CAGGAAGTGAACAGAACCACA<br>CCCGACTATGTTTCGCCTGGGA |
| PCDHB10 | Dharmacon | M-013278-00 | D-013278-01<br>D-013278-02<br>D-013278-03<br>D-013278-04 | CGAACAACCTTTCAAATCA<br>CCGATGATAACAAACAATA<br>GGGACAGCATTTAGACTAG<br>TAACATTAGTGGCGGTGAT            |
|         | Qiagen    | 143D11      | SI00679315<br>SI00679322<br>SI00679329<br>SI00679336     | AAGGAATTAATTACTATTATA<br>ATGCCTTATAATTGAAATAAA<br>TTGGATTTAATATTCAGTAAA<br>CAAATTTAAGTTATTATGCAA    |
| PCDHB7  | Dharmacon | M-013526-00 | D-013526-01<br>D-013526-02<br>D-013526-03<br>D-013526-04 | GAACTAGAATTTGTTTCAGA<br>GAACCAACAGCCTGAGTAA<br>TTAAAGCGCAATTTGGACTA<br>CATTAACTATTCAGGCCAA          |
|         | Qiagen    | 143G11      | SI00679595<br>SI00679602<br>SI00679609<br>SI00679616     | CTGAGTAGGAATATTACATAA<br>TTGGACTATGAGGCAATTTCAA<br>CCCGAATTTGGTGTGATGAA<br>TAGAATTTGTTTCAGACCAGAA   |

| HGNC    | Source    | Pool ID     | siRNA ID                                                 | Sequence                                                                                          |
|---------|-----------|-------------|----------------------------------------------------------|---------------------------------------------------------------------------------------------------|
| PCDHB9  | Dharmacon | M-013279-00 | D-013279-01<br>D-013279-02<br>D-013279-03<br>D-013279-04 | GAAACCGTCTGTTGACAAT<br>GGAAAGACAATTTGCTATG<br>AAACTCTCCTGGGATAGTA<br>GACCTCCACTATACGCATT          |
|         | Qiagen    | 143E11      | SI00679651<br>SI00679658<br>SI00679665<br>SI00679672     | AAGGATCAATCTCTTATTTAA<br>CCCCTTAATAAAGACATTTA<br>ATGCTTAACTTCACAAGTTAA<br>ATCCTGCTAAATTTCAATTA    |
| PDE4DIP | Dharmacon | M-021870-00 | D-021870-01<br>D-021870-02<br>D-021870-03<br>D-021870-04 | CTAACGAGCTGGAGAAATA<br>GAAGGGAATAGTAAACTTA<br>AGAGCGAGATCATGACTTA<br>GCAAGAAAATGGTCCCTTA          |
|         | Qiagen    | 210F2       | SI00681338<br>SI00681345<br>SI03171301<br>SI03224522     | CTGGTTGATCCTGAAGACATA<br>CAAGCGGAACATTGAGCTGAA<br>CAGCCTCAAGCTGCGCATCTA<br>TACCAGGTAATTGAAGGTCAA  |
| PEG3    | Dharmacon | M-006544-00 | D-006544-01<br>D-006544-02<br>D-006544-03<br>D-006544-04 | GGAGAGACCTTCAATAAGA<br>GCGAAGACCTCAACACAAA<br>GAAAGAGGCGCTATCATTT<br>GGTAAGTCCTTTATTTCATA         |
|         | Qiagen    | 101A8       | SI00682115<br>SI00682122<br>SI00682129<br>SI00682136     | AAGGATGACCCTGATGACAAA<br>CCGGATGTCATCATAGGAGAA<br>GAGGCTTTAGGTTTAATTTAA<br>CAGCGAAGACCTCAACACAAA  |
| PEX11A  | Dharmacon | M-012622-00 | D-012622-01<br>D-012622-02<br>D-012622-03<br>D-012622-04 | GTACCTCGCTTATGCTTAA<br>GGTCTTGTGCTCTATAG<br>GCTCACCCTACTACTATT<br>CGTAAATGGTTTCAGACTAG            |
|         | Qiagen    | 110A11      | SI00682395<br>SI00682402<br>SI00682409<br>SI00682416     | TAGATATTTGTTAGAGCCCAA<br>CAAAGAGAAGGTGGTAATGAA<br>TTGGAAGTAGTACCTACTTTA<br>CTTGTTTCATGTGAGCATTTAA |
| PEX13   | Dharmacon | M-012591-00 | D-012591-01<br>D-012591-02<br>D-012591-03<br>D-012591-04 | CAGCGGATGTTAGGTTTAA<br>GATGATCTTCCACCCAGTA<br>TTTCAGGGCTGTATTGGAT<br>AAACGGTGGAAATCAAGTAA         |
|         | Qiagen    | 35E10       | SI00040558<br>SI00040565<br>SI00040572<br>SI00040579     | CTGGCTAGCCTTGTATGGCCAA<br>TTGACTTGGAAATCCTTAGTAA<br>TACCAACCCAACACTAATAA<br>TACAGCGGATGTTAGGTTTAA |
| PEX26   | Dharmacon | M-019128-00 | D-019128-01<br>D-019128-02<br>D-019128-03<br>D-019128-04 | CCTGGGTCTTTCAGTATTA<br>GAGGTGAAGTGCCTCCTGT<br>GATGTTGGTTCGCCAGCTT<br>GCTCCAAGACCCAGCCAAT          |
|         | Qiagen    | 142B3       | SI00682563<br>SI00682570<br>SI00682577<br>SI00682584     | CAGGATGTTAATGGAGCTGGA<br>TAAATTCTTCATGGAATTTAA<br>AACATAGAACAGATACCTTTA<br>ACAAATGATAGTAGTACATA   |
| PGLYRP2 | Dharmacon | M-008638-00 | D-008638-01<br>D-008638-02<br>D-008638-03<br>D-008638-04 | GGAGATACCTTTCCAGATG<br>CCTCGGACCTTTACGCTTT<br>GCACGTCTATTTCAGGAAAC<br>GGCGCAGGGTCATAAATTT         |
|         | Qiagen    | 57G5        | SI00147056<br>SI00147063<br>SI00147070<br>SI00147077     | CACGTCTATTTCAGGAAACCTA<br>CACCTGGACAATCTCGTGCTA<br>GCCCTTGATCGCCATCACTAA<br>CTGGACTTTGACAGTGCTCAA |
| PHCA    | Dharmacon | M-009430-00 | D-009430-01<br>D-009430-02<br>D-009430-03<br>D-009430-04 | GATTATACCTCCAATGTTT<br>CCACATGACTCTGAAATAT<br>AACGGTACATTGCTTCTTA<br>GGACTGGGTTATACATCAT          |
|         | Qiagen    | 140G10      | SI00683711<br>SI00683718<br>SI00683725<br>SI00683732     | AAGGAAATCCTTAAAGATCTA<br>ATGGATGGTTCTCAAAGGTAA<br>TCAGATTTGATTAATATTGTA<br>ACGCTCCAGTTTATAAAGAAA  |
| PIK3R4  | Dharmacon | M-005025-01 | D-005025-01<br>D-005025-03<br>D-005025-04<br>D-005025-05 | GAGGAGAACTTGCTATATT<br>GCACAGAATTGTCTACCTT<br>GTAAGTCGTTCTATATTTG<br>CAGCTGATGTCTACTGTAA          |
|         | Qiagen    | 87B8        | SI00107184<br>SI02224537<br>SI02660392<br>SI02660399     | TAGAGGCAGAAGATTACTTAA<br>AAGCAGAATTCTAGATCAGAA<br>AAGATGTAAGTTGACTAGTTAA<br>CAAGCAATGCGTGACTTTAA  |

| HGNC     | Source    | Pool ID     | siRNA ID                                                 | Sequence                                                                                          |
|----------|-----------|-------------|----------------------------------------------------------|---------------------------------------------------------------------------------------------------|
| PKIB     | Dharmacon | M-008224-01 | D-008224-02<br>D-008224-04<br>D-008224-05<br>D-008224-06 | GAGGACAGATTCATCAAAA<br>AAACAACACAAGACCAATT<br>AGACGGAACCTCAGATTTG<br>AGTCTGGGGTTCGCCAATTT         |
|          | Qiagen    | 84A3        | SI00162218<br>SI00288575<br>SI00288582<br>SI03052336     | AAGGCTCATAATCTATCAAGA<br>CAGCATGTGTATATTAGATAA<br>CCGGAATGCCTTACCAGACAT<br>ATGTCTGTATACAGTAACCAA  |
| PLK1     | Dharmacon | M-003290-01 | D-003290-05<br>D-003290-06<br>D-003290-07<br>D-003290-08 | CAACCAAAGTCGAATATGA<br>CAAGAAGAATGAATACAGT<br>GAAGATGTCCATGGAAATA<br>CAACACGCCTCATCCTCTA          |
|          | Qiagen    | 83H11       | SI00071624<br>SI00071631<br>SI02223837<br>SI02223844     | CAACGGCAGCGTGCAGATCAA<br>CACCATATGAATTGTACAGAA<br>CCGGATCAAGAAGAATGAATA<br>CGCGGGCAAAGATTGTGCCTAA |
| PNMAL1   | Dharmacon | M-021021-00 | D-021021-01<br>D-021021-02<br>D-021021-03<br>D-021021-04 | AGAAAGCCCTGTGTGAATA<br>TGTTAAAGCTGCCCTCATT<br>CGATGAACCTTCTGGAGGA<br>GAGCAGTGGTGCAGATCAT          |
|          | Qiagen    | 140D2       | SI00389837<br>SI00389844<br>SI00389851<br>SI00389858     | CAGGTGTATGGTAGTAAGTAA<br>CACCATGACTAGTAAATGTAA<br>AAGGAAGAAGTACCAAGTCAA<br>CTCGTGATGATTTCATTTCAA  |
| POLE     | Dharmacon | M-020132-00 | D-020132-01<br>D-020132-02<br>D-020132-03<br>D-020132-04 | AGAGAAGGCTGGCGGATTA<br>GGAAACCTCTAAGAAGATA<br>TGAAGGAGATCACCCAGTA<br>GAAGAGGTATGCTGTGTTC          |
|          | Qiagen    | 46C7        | SI00086023<br>SI00086030<br>SI03028872<br>SI03037755     | CCGCATCATCCTCTGTACAAA<br>CTGGATGGATCCATCTAACTA<br>AACCGTATTTCTACATTCGGA<br>ACAGATCGGAATATTCGGAA   |
| POLR2A   | Dharmacon | M-011186-01 | D-011186-02<br>D-011186-03<br>D-011186-04<br>D-011186-05 | CAACATCTCCTACTTATTC<br>TAATAGAGGTCATCGAGAA<br>GAAGGTGACTGCCAACACA<br>GGGATGAGATGAACTTGCA          |
|          | Qiagen    | 102B3       | SI00688975<br>SI00688982<br>SI00688989<br>SI00688996     | CTCGGGAAGAACAAGCTAAA<br>CACCACAGTCTCCAACCTATA<br>CCGACTTAAGGAGCTCATCAA<br>CAGGACATTCAGAACACTATT   |
| POLR2F   | Dharmacon | M-004723-00 | D-004723-01<br>D-004723-02<br>D-004723-03<br>D-004723-04 | CAGACAACGAGGACAATTT<br>GGAGAATGCCGAAGAGGAA<br>GATGGGAGCTATGAAGACT<br>CATCATCATTCGCCGTTAC          |
|          | Qiagen    | 102F3       | SI00689087<br>SI00689094<br>SI00689101<br>SI00689108     | TCACTTTATATGTGTAATAA<br>CACACCATACATGACCAAGTA<br>TTGGAGAATGCCGAAGAGGAA<br>CTGCCAGATGGGAGCTATGAA   |
| POP1     | Dharmacon | M-014148-00 | D-014148-01<br>D-014148-02<br>D-014148-03<br>D-014148-04 | GAACCGGACGCTAGAATTT<br>CGATGGAGATGAACAGATT<br>GCAGTGCATTCTCAGTATA<br>GCCAAGCGGTTTCATATGG          |
|          | Qiagen    | 119E9       | SI00689759<br>SI00689766<br>SI00689773<br>SI00689780     | CAGGGCATAGATAATACGTTA<br>TCCCTTAAATGTCAAATGCAA<br>CTCCCTGGAAACAAGAATAAA<br>CTGGTGGATAGAAACCTGTAA  |
| PPP1R16A | Dharmacon | M-018795-00 | D-018795-01<br>D-018795-02<br>D-018795-03<br>D-018795-04 | GGGCCGACCTGAACGCAAA<br>CCTATGACCTGTGTGATGA<br>CACCAGTGCTGCATTGATG<br>GAGCCAGCCTGAGCGCTAA          |
|          | Qiagen    | 164F11      | SI00144921<br>SI02658187<br>SI02658194<br>SI02658201     | CCCGAGCAGCCCTGTGGGCAA<br>CCGAGCCAGCCTGAGCGCTAA<br>CCGGAAGCTGGAACCTTGTTA<br>CAGCCCTGACTTGCCAACGA   |
| PQBP1    | Dharmacon | M-012716-00 | D-012716-01<br>D-012716-02<br>D-012716-03<br>D-012716-04 | TCAAACATCTGGAGCCTGA<br>GATCATTGCCGAGGACTAT<br>CCATGGACCCTAGCTCATA<br>ACGATGATCCTGTGGACTA          |
|          | Qiagen    | 210A7       | SI00691691<br>SI00691698<br>SI00691705<br>SI00691712     | AGCCGAAAGGATGAAGAGTTA<br>CCGAAAGGATGAAGAGTTAGA<br>CTCAAACATCTGGAGCCTGAA<br>CCCAACTCCGTGGTTACCAAA  |

| HGNC   | Source    | Pool ID     | siRNA ID                                                 | Sequence                                                                                           |
|--------|-----------|-------------|----------------------------------------------------------|----------------------------------------------------------------------------------------------------|
| PRDM8  | Dharmacon | M-020669-00 | D-020669-01<br>D-020669-02<br>D-020669-03<br>D-020669-04 | GACGAGGAGTTACTAGTTT<br>GCAATGAGTCCTTCAGGGA<br>CATATGAGGTCGCACCACA<br>CCGTATATCTTTTCGGGTAG          |
|        | Qiagen    | 52D3        | SI00125468<br>SI00125475<br>SI00125482<br>SI00125489     | CTCGCATAATTGACTCGGAAA<br>CCGCTGGAAAGCGGTCATAAA<br>TCCAACAATGTCTGACAGATA<br>CGCGCGCGCAAGCACAGTTAA   |
| PSMD1  | Dharmacon | M-011363-00 | D-011363-01<br>D-011363-02<br>D-011363-03<br>D-011363-04 | GCAATGATATCGTTAGACA<br>GAGATAATTTGGAATGGTT<br>GTGCCTGGATCCACTAATA<br>CGAATGATGTCCAGGAAT            |
|        | Qiagen    | 102F9       | SI00694750<br>SI00694757<br>SI03246649<br>SI03246985     | TTGGAAGGCATCGTAAATAAA<br>CTGCATGTCTTTAATGCAGAA<br>AAGCAGTGCATTTGTAGGAAA<br>CAGGCTGTGAGTGATATCTTA   |
| PSMD3  | Dharmacon | M-011364-00 | D-011364-01<br>D-011364-02<br>D-011364-03<br>D-011364-04 | CCGCAAAGTGTTACTATTA<br>GGACCTACACCCTAATTAT<br>CAGCTACGCTTCGGCATGA<br>ACCACTATGTTCTGTATAA           |
|        | Qiagen    | 102G9       | SI00694883<br>SI00694890<br>SI00694897<br>SI00694904     | CAAGGAGATGATTGACATCTA<br>CACGTGAAACAGCTAGAGAAA<br>CAGATGGGACCTACACCCTAA<br>CACGAGAAGGGCTATGTCCAA   |
| PSMD8  | Dharmacon | M-017583-00 | D-017583-01<br>D-017583-02<br>D-017583-03<br>D-017583-04 | CCACAGAAGTGGCCAAACA<br>GCTACTACTTTGATTACAA<br>CAGTGTCCCTGGAGCAATA<br>GAGGGCAGCTACAACAAG            |
|        | Qiagen    | 102A10      | SI00694967<br>SI00694974<br>SI00694981<br>SI00694988     | TCCAAGTACATGTTTCAATTA<br>AAGGGCGAGTGGAACCGTAAA<br>CTGCAGGGTTTCGCCCAATAA<br>ATGCTACTACTTTGATTACAA   |
| PTGES  | Dharmacon | M-008462-01 | D-008462-01<br>D-008462-03<br>D-008462-04<br>D-008462-05 | GCACGCTGCTGGTCAATCAA<br>GGGCTTCGTCTACTCCTTT<br>GGATGCACTTCCTGGTCTT<br>TGGCACACACCGTGGCCTA          |
|        | Qiagen    | 45G7        | SI00069573<br>SI00069587<br>SI00069594<br>SI03035816     | TTGGGTGACCAGCCACTCAAA<br>CGGGCTAAGAATGCAGACTTT<br>CAGCACGCTGCTGGTCAATCAA<br>AAGGGAGACTCTATTTAAGAT  |
| PTPN13 | Dharmacon | M-008065-00 | D-008065-01<br>D-008065-02<br>D-008065-03<br>D-008065-04 | GAACAAACCATGAAGATTC<br>GAAGAAATATGGGCTGTAT<br>GGAAAGAAGAGTTCGTTTA<br>CAGATCAGCTTTTCTGTAA           |
|        | Qiagen    | 78G11       | SI00086660<br>SI02637047<br>SI02659342<br>SI02659349     | AACCTTTGGATCAGTGTCTAA<br>TCCAGGTACATTAAGATGAA<br>CGGTCTATTCTTACTAAGAAA<br>TCGATGGATAAGTATCATATA    |
| PTPRE  | Dharmacon | M-008068-02 | D-008068-02<br>D-008068-03<br>D-008068-04<br>D-008068-06 | GCGAACAGGTACATTCATA<br>GAATGGAAATCCCACACTA<br>CGATTGAGATAAAGAATGA<br>AAACGGATATGCAGTACAC           |
|        | Qiagen    | 79E2        | SI00089068<br>SI00089075<br>SI00089082<br>SI02665635     | ACCACGGGCAATTAACCTTTA<br>GACCATCGTCATGTTAACAAA<br>CAGTGAATTCACAACCCTGAA<br>CCGAGTGTATCCTTTCCATGAA  |
| PVRL3  | Dharmacon | M-013952-01 | D-013952-02<br>D-013952-03<br>D-013952-04<br>D-013952-05 | GGAATATTCTGCTATAGGA<br>GCGAATTACTTGTGTTGTA<br>ACAATGGCCTGATGGTTTA<br>CCGATACTCTTTCATATTA           |
|        | Qiagen    | 26A11       | SI00696262<br>SI00696269<br>SI03024343<br>SI03029565     | CACATGTAGATGGTTCCGTAA<br>ATCGAGGATCTAGCAACAGAA<br>TTGCTAGAGGAAGCGAATTA<br>AACGATTATCAGCCAGTACAA    |
| RAB3D  | Dharmacon | M-010822-01 | D-010822-02<br>D-010822-03<br>D-010822-04<br>D-010822-05 | TGACATCGCCAATCAGGAA<br>GTTCAAACCTGCTACTGATA<br>GTACTGTGGGCATCGATTT<br>GGACGAACGTGTTGTGCCT          |
|        | Qiagen    | 36C4        | SI00062181<br>SI00062195<br>SI00062202<br>SI03052595     | CAGGCCCTGTTTAGCTGTFTA<br>CTGGAACCTATGGACCACATTA<br>AAGCAAGTTCTTGCCCAATCA<br>CAAACCTGCTACTGATAGGCAA |

| HGNC  | Source    | Pool ID     | siRNA ID                                                 | Sequence                                                                                         |
|-------|-----------|-------------|----------------------------------------------------------|--------------------------------------------------------------------------------------------------|
| RAD51 | Dharmacon | M-003530-03 | D-003530-02<br>D-003530-05<br>D-003530-07<br>D-003530-08 | GAAGCTATGTTTCGCCATTA<br>GCAGTGATGTCTGGATAA<br>CCAACGATGTGAAGAAAT<br>AAGCTATGTTTCGCCATTA          |
|       | Qiagen    | 56G2        | SI00045010<br>SI02663682<br>SI03061338<br>SI03072272     | CAGGATAAAGCTTCCGGGAAA<br>AAGGGAATTAGTGAAGCCAAA<br>CACGGTTAGAGCAGTGTGGCA<br>CAGGTGGTAGCTCAAGTGGAT |
| RAP2C | Dharmacon | M-010057-00 | D-010057-01<br>D-010057-02<br>D-010057-03<br>D-010057-04 | CAACTTGTGTCTGCCAGTA<br>GAAGATTTCTACCGCAAAG<br>GCAAATCTGCCCTTACTGT<br>GAGATCAAATTTGTCAGAGT        |
|       | Qiagen    | 26H3        | SI00130039<br>SI03069794<br>SI03076458<br>SI03117611     | ATGGCTAATATACAAGGGTTA<br>CAGGATATCAAGCCAATGAGA<br>CCCACTAATCCTAGTAGGAAA<br>TGAGATCGTCAGGCAAATGAA |
| RAPH1 | Dharmacon | M-031919-00 | D-031919-01<br>D-031919-02<br>D-031919-03<br>D-031919-04 | GGAAGCAGCTCTATATGAA<br>CGACATACATTGAAACATG<br>GCGAGCATCTGGTATCTAC<br>GCATGGACTCTTTGGATAT         |
|       | Qiagen    | 218H5       | SI00698635<br>SI00698642<br>SI00698649<br>SI00698656     | AAGGATTATCTTCTTCATCTA<br>CTGGATCATGTCAACGTTTAT<br>CAGCTCTATATGAACTACCAA<br>ATGGCTGATCTTTGCTCTATA |
| RBBP9 | Dharmacon | M-017623-00 | D-017623-01<br>D-017623-02<br>D-017623-03<br>D-017623-04 | TCGAGTATATGCTATTGTA<br>AAACATGCCCGACCCAATT<br>AGAAGTGGCCGATAGGTTG<br>GGCCATGAGGTATGCAGAA         |
|       | Qiagen    | 211H5       | SI00699307<br>SI00699314<br>SI00699321<br>SI00699328     | CTGAATGGAAATCAACTGTAA<br>TTGAATAATAATGTTGTTAAA<br>ACAATGTATTTGACTACTAA<br>TAGGATAAATGATCCATTTAA  |
| RBM8A | Dharmacon | M-003531-00 | D-003531-01<br>D-003531-02<br>D-003531-03<br>D-003531-04 | GGTATACTCTAGTTGAATA<br>GTTGAAGGCTGGATTCTCT<br>GGACGAGAGCATTCACAAA<br>TGAGGAAGCCACCGAAGAA         |
|       | Qiagen    | 38A6        | SI00699951<br>SI03046533<br>SI03070004<br>SI03070536     | ACACGACAAATTCGCAGAATA<br>ATACTCTAGTTGAATATGAAA<br>CAGGATGGCGATGAACCCGGA<br>CAGGCGAACAGGATATCTGAA |
| RIC8B | Dharmacon | M-021081-00 | D-021081-01<br>D-021081-02<br>D-021081-03<br>D-021081-04 | CAACATGCTTGATAAACTT<br>GCAAGGACCGGAAATTTAT<br>GGTCACAATTGCGCTATGA<br>AATCGGCCATAGACCATAA         |
|       | Qiagen    | 139H8       | SI00444248<br>SI00444255<br>SI00444262<br>SI00444269     | CAGAAAGAGCTGGTAAATAAA<br>CTCCCTATAAAGAGTTATAAA<br>CAGCACCCATTTGTACATATA<br>TAGGGCTACTTTCAAATTTGA |
| RND3  | Dharmacon | M-007794-01 | D-007794-02<br>D-007794-03<br>D-007794-04<br>D-007794-05 | GAACGTGAAATGCAAGATA<br>GAAATTATCCAGCAAATCT<br>TAGTAGAGCTCTCCAATCA<br>AGAATTACACGCCAGTTT          |
|       | Qiagen    | 90H8        | SI00301371<br>SI00301392<br>SI00301399<br>SI00301406     | CAGCCAGAAATTATCCAGCAA<br>CGGACAGATGTTAGTACATTA<br>TTCATTGTGATTGTCAATAAA<br>CACCTTGGCATGTGTAATAA  |
| RPA1  | Dharmacon | M-015749-00 | D-015749-01<br>D-015749-02<br>D-015749-03<br>D-015749-04 | GAAGTCAGCTGAAGCAGTT<br>GGAATGGGTTCTACTGTTT<br>GCAATCCAGTGCCCTATAA<br>GAAGTGCGACACCGAATTT         |
|       | Qiagen    | 46B8        | SI00046025<br>SI00046032<br>SI02663696<br>SI02663703     | GAGGTGCTACATAGTTGGTAA<br>ACCGCATGATCCTGTGAGTAA<br>CAGGAATTATGTGTAAGTCA<br>CCGTGTGACGATCCCATGTTA  |
| RPA2  | Dharmacon | M-017058-00 | D-017058-01<br>D-017058-02<br>D-017058-03<br>D-017058-04 | GATCAATGCACACATGGTA<br>CAAAATAGATGACATGACA<br>GAGTGAAGCAGGGAATTT<br>GTGGAACAGTGGATTTCGAA         |
|       | Qiagen    | 46H3        | SI00046046<br>SI00046060<br>SI00046067<br>SI02664956     | TACCAGGAGAGTACTTACATA<br>CCAGGTGTTGAATTTGATTA<br>AAGGCTTGTCCAAGACCTGAA<br>AACAGTGGATTTCGAAAGCTAT |

| HGNC   | Source    | Pool ID     | siRNA ID                                                 | Sequence                                                                                          |
|--------|-----------|-------------|----------------------------------------------------------|---------------------------------------------------------------------------------------------------|
| RPA3   | Dharmacon | M-003322-01 | D-003322-05<br>D-003322-06<br>D-003322-07<br>D-003322-08 | GGAAGTGGTTGGAAGAGTA<br>GAAGATAGCCATCCTTTTGG<br>CATGCTAGCTCAATTCATC<br>GATCTTGGACTTTACAATG         |
|        | Qiagen    | 46C8        | SI00046074<br>SI00046081<br>SI00046088<br>SI03057180     | AAGGGAGTAAATCGACCCTCA<br>TCGCTGATTGGTGCCGAGAAA<br>TCCGCGCATTTAATTGGCGAA<br>CACCACGTATCATTCCGCAA   |
| RPH3AL | Dharmacon | M-017670-00 | D-017670-01<br>D-017670-02<br>D-017670-03<br>D-017670-04 | GAAAGTCTGCACCAAATGT<br>GACAAACCCTGGAAGGAGT<br>TGTGTAAGATCTGCAGTGA<br>GGGAATGATCAGTGGGTTT          |
|        | Qiagen    | 113B3       | SI00705411<br>SI00705418<br>SI00705425<br>SI00705432     | CACGTTATGCTTCAGAATTA<br>CAGGAAGAAAAGTCTGCACCAA<br>CTGCCTTATTGAAACCATCTA<br>GAGGTTTGGCTTGGCATGAAA  |
| RPL10L | Dharmacon | M-013264-00 | D-013264-01<br>D-013264-02<br>D-013264-03<br>D-013264-04 | GAAGTTTAATGCTGACGAA<br>GAGTGCGGCTCCATCCCCTT<br>GGTGAAAAGTTGTGGCAGA<br>GTTGTGGAGTCAAGTACGT         |
|        | Qiagen    | 177F7       | SI00705551<br>SI00705558<br>SI00705565<br>SI00705572     | CTGACTTATGCTTACTAATA<br>ACGAAGTTTAATGCTGACGAA<br>CCGTATTTGTGCCAACAAATA<br>CCAGAAGATTCATATCTCCAA   |
| RPL14  | Dharmacon | M-012948-00 | D-012948-01<br>D-012948-02<br>D-012948-03<br>D-012948-04 | GCATGCAGCTCACTGATTT<br>AAGCCAAGATGACAGATTT<br>GAAAATTGGTCGCGATTGT<br>CGATGGACCTTGCACCTCAA         |
|        | Qiagen    | 111D8       | SI00705663<br>SI00705670<br>SI00705677<br>SI00705684     | CAGATTGATAGTAGGATTATA<br>CACCAGAAGTATGTCCGACAA<br>CCTGTTGACAAATGTATTTAA<br>AATAAACATTAATAATCAAA   |
| RPL18  | Dharmacon | M-011142-00 | D-011142-01<br>D-011142-02<br>D-011142-03<br>D-011142-04 | GAAGAACCAACTCCACATT<br>GCAAGGAGCCCAAGAGCCA<br>GAGTGGACATCCGCCATAA<br>GGCTGTTGGTCAAGTTATA          |
|        | Qiagen    | 103A7       | SI00705775<br>SI00705782<br>SI00705789<br>SI00705796     | GAGGCTGTTGGTCAAGTTATA<br>CCGCCATAACAAGGACCGAAA<br>ACCCTGGATCCTACTCTCTTA<br>CGCCATCATGGGAGTGGACAT  |
| RPL24  | Dharmacon | M-011144-00 | D-011144-01<br>D-011144-02<br>D-011144-03<br>D-011144-04 | TAGAAAGGCTCAACGAGAA<br>TATCAGGGCTGCTAAGGAA<br>GTGCATCTCTTGCTGATAT<br>CGAAATGCGAGTCGGCTTT          |
|        | Qiagen    | 103D7       | SI00705971<br>SI00705978<br>SI00705985<br>SI00705992     | AAGAGGAATCAGAAACCTGAA<br>AAGGCTAAGCAAGCATCTAAA<br>CAGGGCTGCTAAGGAAGCAAA<br>TAAATAAAGATTGGATTATA   |
| RPL28  | Dharmacon | M-011145-00 | D-011145-01<br>D-011145-02<br>D-011145-03<br>D-011145-04 | GGAATAAGCAGACCTACAG<br>CGGCAAAGGTGTCTGGTGT<br>CGCAATTCCTTCCGCTACA<br>AATGGATGGTCGTGCGGAA          |
|        | Qiagen    | 103F7       | SI00706083<br>SI00706090<br>SI00706097<br>SI00706104     | CAGGGTTGATGAGAAGATTAA<br>ATGGTGCATATTGAATGTATA<br>TAGGAATAAATTAATGACTTT<br>CTGCTTGA CTGTGCCACAAA  |
| RPL30  | Dharmacon | M-013604-00 | D-013604-01<br>D-013604-02<br>D-013604-03<br>D-013604-04 | GCACACTGGCTATCATTGA<br>GATCAACTCTAGGCTCCAA<br>GGAAGTACGTCCTGGGGTA<br>AGAGTACTATGCTATGTTG          |
|        | Qiagen    | 103E7       | SI00706167<br>SI00706174<br>SI00706181<br>SI00706188     | CAGGAAGATGGTGGCCGCAAA<br>CTGAAATAGAGTACTATGCTA<br>AGGCTCCA ACTCGTTATGAAA<br>CAGGTGACTCTGACATCATTA |
| RPL34  | Dharmacon | M-013545-00 | D-013545-01<br>D-013545-02<br>D-013545-03<br>D-013545-04 | GCACAGAGTCAGAAAGCTA<br>AAACTAGGCTGTCCCGAAC<br>CGTTTGACATACCGACGTA<br>TACAATACAGCCTCTAACA          |
|        | Qiagen    | 207G2       | SI00706279<br>SI00706286<br>SI00706293<br>SI00706300     | CAGTATATGATCCTAATATA<br>AAGCACAGAGTCAGAAAGCTA<br>TACCAGGAGCTCTGATATATA<br>AATGACTTGATTGTTATTATA   |

| HGNC   | Source    | Pool ID     | siRNA ID                                                 | Sequence                                                                                           |
|--------|-----------|-------------|----------------------------------------------------------|----------------------------------------------------------------------------------------------------|
| RPL35  | Dharmacon | M-012371-00 | D-012371-01<br>D-012371-02<br>D-012371-03<br>D-012371-04 | GGAAATCCATTGCCCGTGT<br>CCTAAGAAGACACGTGCCA<br>GCGCGTCGCCAAAGTGACA<br>GGAAGTACGCGGTCAAAGGC          |
|        | Qiagen    | 6A11        | SI02663871<br>SI02663878<br>SI03032260<br>SI03056186     | CCGTGTTCTCACAGTTATTAA<br>TGCAGCAATGGCCAAGATCAA<br>AAGATCCGAGTCGTCCGGAAA<br>CACAGCTGGCTGAGACTGCAA   |
| RPL38  | Dharmacon | M-011133-00 | D-011133-01<br>D-011133-02<br>D-011133-03<br>D-011133-04 | AGGACAACGTGAAGTTTAA<br>GCTCACAGCCCACGAAAG<br>GATGCCAAATCTGTCAAGA<br>GATGCAGCAGATACTTTA             |
|        | Qiagen    | 6C10        | SI02624762<br>SI02624769<br>SI03042067<br>SI03078845     | CACCCTGGTCATCACTGACAA<br>CAGTGAAGGAACTGAAATGAA<br>ACTGATTGGAAGTGTATTATA<br>CCCGGTTTGGCAGTGAAGGAA   |
| RPL39L | Dharmacon | M-012971-00 | D-012971-01<br>D-012971-02<br>D-012971-03<br>D-012971-04 | TAGGGTGGATTTCAGTAATA<br>TGTATGCTCTGTGCTAGTA<br>CAAGTTCACGATCATCTTA<br>CAGATGAAACCTGGTAGTA          |
|        | Qiagen    | 170H10      | SI00706531<br>SI00706538<br>SI00706545<br>SI00706552     | CAGATGAAACCTGGTAGTAAA<br>CAGATCGAGATTTGCGTCTTA<br>TCGGAGTCTCAGAGACACCAA<br>TTGCCTCTTTGGAGTAGGAAA   |
| RPL4   | Dharmacon | M-008956-00 | D-008956-01<br>D-008956-02<br>D-008956-03<br>D-008956-04 | GCAGAGTCCATAAAGAAGAA<br>AGATAAAGTTGAAGGCTAC<br>CTACTACAGAGGAGAAGAA<br>TGTTGAAGCTAAACCCATA          |
|        | Qiagen    | 6E9         | SI00019446<br>SI00019453<br>SI03066294<br>SI03102512     | CAGGCAGTGAGAAACATGAAA<br>AAAGCCTGGAATGATATCAAA<br>CAGCCCTATGCTGTCAAGTAA<br>GAGAAGAAGCCTGTGCATAA    |
| RPL7A  | Dharmacon | M-011134-00 | D-011134-01<br>D-011134-02<br>D-011134-03<br>D-011134-04 | GGTGAACCTCGGAAGACAAA<br>CCATCGAGCTGGTTGTCTT<br>CTAAGTCTGTGGCTCGTAT<br>GGACGTCCCAACGAAGAGA          |
|        | Qiagen    | 6F9         | SI00706699<br>SI03077949<br>SI03087595<br>SI03114230     | CAGGTGAACCTCGGAAGACAAA<br>CCCGCCGCCAAGATGCCGAA<br>CTAAACTGGGTTAAATGTACA<br>TCCCATCGAGCTGGTTGTCTT   |
| RPL8   | Dharmacon | M-013721-00 | D-013721-01<br>D-013721-02<br>D-013721-03<br>D-013721-04 | GGGCGTACCACAAATATAA<br>GAACTGCTGGCCACGAGTA<br>CGGGATCCGTATCGGTTTA<br>CAAGAAGACCCGTGTGAAG           |
|        | Qiagen    | 207E2       | SI00706755<br>SI00706762<br>SI00706769<br>SI00706776     | CCGGGCGTACCACAAATATAA<br>CTCAATAAAGTTTGTGTTTAT<br>AAAGTTTGTGTTTATGCCAAA<br>TCCGGGATCCGTATCGGTTTA   |
| RPLP0  | Dharmacon | M-010864-00 | D-010864-01<br>D-010864-02<br>D-010864-03<br>D-010864-04 | GATCAAGACTGGAGACAAA<br>GGACGAGGATATGGGATTT<br>GAGAAACTGCTGCCTCATA<br>GATTTGGTCTCTTTGACTA           |
|        | Qiagen    | 207H2       | SI02650473<br>SI02650487<br>SI02660798<br>SI02660805     | TCCGCGGTTTCTGATTGGCTA<br>ACGGGCGATGGCGCAGCCAAT<br>CTACTTTGTTTCGCATTATAAA<br>TTGGCTACTTTGTTTCGCATTA |
| RPLP1  | Dharmacon | M-011135-00 | D-011135-01<br>D-011135-02<br>D-011135-03<br>D-011135-04 | CATTAAAGCAGCCGGTGTA<br>GCACGACGATGAGGTGACA<br>TGGCCTGGCTTGTTTGCAA<br>AAGAAGAATCCGAGGAGTC           |
|        | Qiagen    | 207A3       | SI00706818<br>SI00706825<br>SI00706832<br>SI04799970     | CTGCATCTACTCGGCCCTCAT<br>AAAGTGGAAGCAAAGAAAGAA<br>TCGGTCCTTCCGAGGAAGCTA<br>AAGAAAGTGAAGCAAAGAAA    |
| RPS11  | Dharmacon | M-013569-00 | D-013569-01<br>D-013569-02<br>D-013569-03<br>D-013569-04 | GAACATGTCTGTACACCTG<br>GAGACTATCTGCACTACAT<br>GATCCTCTCTGGCGTGGTG<br>CCAGATCGGTGACATCGTC           |
|        | Qiagen    | 103C9       | SI00707147<br>SI00707154<br>SI00707161<br>SI00707168     | CCCTGCGTAATCGATAAGGAA<br>CGGGAAGATGGCGGACATTCA<br>TGGCGTGGTGACCAAGATGAA<br>CCACAATGAAATAAAGTTATT   |



| HGNC  | Source    | Pool ID     | siRNA ID                                                 | Sequence                                                                                           |
|-------|-----------|-------------|----------------------------------------------------------|----------------------------------------------------------------------------------------------------|
| RPS13 | Dharmacon | M-011150-00 | D-011150-01<br>D-011150-02<br>D-011150-03<br>D-011150-04 | GGATAAGGATGCTAAATTC<br>CTAAGGGACTTGCTCCTGA<br>CCAGTCGGCTTTACCCAT<br>CCGTTTGGCTCGATATTAT            |
|       | Qiagen    | 103D9       | SI00707203<br>SI00707210<br>SI00707217<br>SI00707224     | ACCGTTTGGCTCGATATTATA<br>CTGAAGATCTCTACCATTAA<br>TCGCATAAAATTTGTCTGTGTA<br>CAGAAAGGATAAAGGATGCTAA  |
| RPS19 | Dharmacon | M-003771-00 | D-003771-01<br>D-003771-02<br>D-003771-03<br>D-003771-04 | CCAGCAGGAGTTCGTCAGA<br>CCGTCAAGCTGGCCAAGCA<br>CCTACGATGAGAAGCTGGTT<br>GCCGAGGCTCCAAGAGTGT          |
|       | Qiagen    | 6E10        | SI03077522<br>SI03092460<br>SI03109078<br>SI03113649     | CCCGACTTGTGCGCCCGGAA<br>CTCTCTATCCTCTCTATTA<br>TACCGTCAAGCTGGCCAAGCA<br>TCCAGCCACGAACGACGCAAA      |
| RPS21 | Dharmacon | M-011153-00 | D-011153-01<br>D-011153-02<br>D-011153-03<br>D-011153-04 | TCTAGGATGGGTGAGTCA<br>CAGGTTTAATGGCCAGTTT<br>CCATTCTCCGATTGGCCAA<br>GCATCGTCTCAAAGAAGT             |
|       | Qiagen    | 103F9       | SI00707483<br>SI00707490<br>SI00707497<br>SI00707504     | TGGAATATTTGTCATAAATA<br>CGGCGAGTTCGTGGACCTGTA<br>CAAGGTCACAGGCAGGTTTAA<br>GCGGAAATGCTCCGCTAGCAA    |
| RPS24 | Dharmacon | M-011155-00 | D-011155-01<br>D-011155-02<br>D-011155-03<br>D-011155-04 | GAACGACACCGTAACATATC<br>AGACATGGCCTGTATGAGA<br>CAACGAAAGGAACGCAAGA<br>GTACAAGACCCACACCGGAT         |
|       | Qiagen    | 207D3       | SI00707539<br>SI00707546<br>SI00707553<br>SI00707560     | CAAGAACATTAATAAACTAAA<br>CGCAAGAACATTAATAAACTA<br>CACTAGAAAGTTCATGACCAA<br>AAGATAGATCGCCATCATGAA   |
| RPS28 | Dharmacon | M-013679-00 | D-013679-01<br>D-013679-02<br>D-013679-03<br>D-013679-04 | GACACGAGCCGATCCATCA<br>GCAGGTGCGCGTGGAATTC<br>GCGACGTGCTCACCCTTT<br>GGACCGGTTCTCAGGGACA            |
|       | Qiagen    | 103H9       | SI00707714<br>SI00707721<br>SI00707728<br>SI03145072     | CTGAGATGCTCCTTTAAATA<br>GCCGATGGGAATGGTCTGTCA<br>CCCGGAGGTTGCGCTGAGCTT<br>AGCGTTTGTGTTTCAAGTAA     |
| RPS29 | Dharmacon | M-011157-00 | D-011157-01<br>D-011157-02<br>D-011157-03<br>D-011157-04 | GGTCTGATCCGGAAATATG<br>GGTTCTCGCTCTTGTCGTG<br>CAATATGTGCCGCCAGTGT<br>ACGCGAAGGATATCGGTTT           |
|       | Qiagen    | 103A10      | SI00707735<br>SI00707749<br>SI02786350<br>SI04861990     | ATGATAATTCCTTGTATATA<br>GAAGGATATCGGTTTCATTA<br>CCGCCAGTGTFTCCGTCAGTA<br>CCGGCACGGTCTGATCCGGAA     |
| RPS3A | Dharmacon | M-013603-00 | D-013603-01<br>D-013603-02<br>D-013603-03<br>D-013603-04 | CATGATGTCTTCGTTAGAA<br>GGTCGTGTGTTTGAAGTGA<br>TGAACGAGCTGATGGATAT<br>GAACAAGCGCCTTACGAAA           |
|       | Qiagen    | 207B3       | SI00707819<br>SI00707826<br>SI00707833<br>SI00707840     | CACCTGCTATGTTCAATATA<br>CCGGAAGAAGATGATGGAAAT<br>TTGAAAGAAGTGGTCAATAAA<br>AAAGATTGGTATGATGTGAAA    |
| RPS5  | Dharmacon | M-010498-01 | D-010498-02<br>D-010498-03<br>D-010498-04<br>D-010498-05 | ACATTTCCCTGCAGGATTA<br>CCGCCAAACGCTTCCGCAA<br>GCACCGATGATGTGCAGAT<br>GAACTCCTATGCCATTAAG           |
|       | Qiagen    | 103A9       | SI00707959<br>SI00707966<br>SI00707973<br>SI00707980     | CACCGATGATGTGCAGATCAA<br>CTCGAACTCCTATGCCATTA<br>CCTGGTGAACGCCATCATCAA<br>CCGGGAGGACTCCACACGCAT    |
| RPS9  | Dharmacon | M-011131-00 | D-011131-01<br>D-011131-02<br>D-011131-03<br>D-011131-04 | GAACATCCCCTCCTTCATT<br>GCGGAGACCCCTCGAGAAA<br>GAAGCTGATCGGCGAGTAT<br>GGCAAGATGAAGCTGGATT           |
|       | Qiagen    | 103B9       | SI00708071<br>SI00708078<br>SI00708085<br>SI00708092     | ACGGCGTCTGTTTCAAAGGCAA<br>CCCGCGGAGACCCCTTCGAGAA<br>AAACAGGATCAGCGCTTTAAA<br>CCCGGGCCGCGTGAAGAGGAA |

| HGNC    | Source    | Pool ID     | siRNA ID                                                 | Sequence                                                                                         |
|---------|-----------|-------------|----------------------------------------------------------|--------------------------------------------------------------------------------------------------|
| RPSA    | Dharmacon | M-013303-00 | D-013303-01<br>D-013303-02<br>D-013303-03<br>D-013303-04 | GGTCATGCCTGATCTGTAC<br>GCACCAATCTTGACTTCCA<br>GCGCATGCGTGGCACCATT<br>CAACAAGGGAGCTCACTCA         |
|         | Qiagen    | 7B11        | SI00467964<br>SI00467971<br>SI00467978<br>SI03045371     | TCGACATGAGTTGTACTTCTA<br>TACCTGGGATTGCATATCAAA<br>TTGCATATCAAAGCATAATAA<br>AGGCTCTTAAGCAGCATGGAA |
| RSC1A1  | Dharmacon | M-008895-00 | D-008895-01<br>D-008895-02<br>D-008895-03<br>D-008895-04 | GAAAGAACTTCATGAACTT<br>GCTCAACAGTCCCTAGTTA<br>GAACATTGGTGCATTGGAT<br>GCAACAGAATCAACACAAA         |
|         | Qiagen    | 60D6        | SI00089173<br>SI00089180<br>SI00089194<br>SI03027948     | AAGAACCCTTCTGTACTGTA<br>CTCAATCAGACTTCTGAGCAA<br>TAGGGAATCCATAAATAAGAA<br>AACATCGTAGTTCCTACATGA  |
| RUVBL2  | Dharmacon | M-012299-00 | D-012299-01<br>D-012299-02<br>D-012299-03<br>D-012299-04 | TAACAAGGATTGAGCGAAT<br>CGCAGTACATGAAGGAGTA<br>TCAACGAACTCAAAGGCGA<br>ACGCAAGGGTACAGAAGTG         |
|         | Qiagen    | 119F5       | SI00709247<br>SI00709254<br>SI00709261<br>SI00709268     | CCGGAGATCCGTGATGTAACA<br>CACGCAGTACATGAAGGAGTA<br>AACCGTTACAGCCACAACCAA<br>CCAGGACGCCTTCCTCTTCAA |
| SC65    | Dharmacon | M-020141-00 | D-020141-01<br>D-020141-02<br>D-020141-03<br>D-020141-04 | CAGAGTACCTGGCAGTCTT<br>GGACTGTGAGGCCAATTTG<br>CCGCCAAGTATCTCAACTA<br>ACGCGCTGTTCAAGCTAA          |
|         | Qiagen    | 118G5       | SI00711347<br>SI00711354<br>SI00711361<br>SI00711368     | CAGCAAGAACTATTTATTTAA<br>CCGGGCTGTGAAGCTCTACAA<br>CGCCAAGTATCTCAACTACTA<br>AATGTTTGTGTTGAATGAAA  |
| SCGB1A1 | Dharmacon | M-016680-00 | D-016680-01<br>D-016680-02<br>D-016680-03<br>D-016680-04 | GGACACACCTCCAGTTAT<br>CCAGAGAAAGCATCATTA<br>GAAACTCGCTGTCACCTC<br>CAAAGCTCACTGTGTAATT            |
|         | Qiagen    | 2H9         | SI00051198<br>SI00051205<br>SI03033002<br>SI03043145     | CAGCCTTGCTCTTCAATAA<br>CTGTGTAATTAGCATTTAGAA<br>AAGCATCATTAAGCTCATGGA<br>AGCCCAAAGCTCACTGTGTAA   |
| SESN3   | Dharmacon | M-018289-00 | D-018289-01<br>D-018289-02<br>D-018289-03<br>D-018289-04 | GAAAGAAGCCTGAAGGTTT<br>GCGCAGAGCTTTATTTAAC<br>GAAGGAAGTTGTCCAAGCA<br>GAGGATGACATGATTATAA         |
|         | Qiagen    | 178C2       | SI00715715<br>SI00715722<br>SI00715729<br>SI00715736     | CAGGCTAATATCAGTCAACAA<br>AAGCCTGAAGGTTTACATTA<br>CAGGCACTATATTGCAATAA<br>AAGACCTTTCACATAAGATAA   |
| SETD8   | Dharmacon | M-031917-00 | D-031917-01<br>D-031917-02<br>D-031917-03<br>D-031917-04 | ACCCGTGGCTGAAGCATT<br>GCAACTAGAGAGACAAATC<br>GATTGAAAGTGGGAAGGAA<br>GCACGACATCGACGGCGTA          |
|         | Qiagen    | 43A8        | SI02664991<br>SI02664998<br>SI03110625<br>SI03116484     | CTGCAGTCTGAAGAAAGGAAA<br>AAGAATAGATGAATTGATTGA<br>TAGAGGCAGGAAGATGTCCAA<br>TCGCCTAGGAAGACTGATCAA |
| SF3A3   | Dharmacon | M-019808-00 | D-019808-01<br>D-019808-02<br>D-019808-03<br>D-019808-04 | GGAGGGATATGGTCGTTAT<br>GCAAACCTATTCCCTACTG<br>CGTCATGGCTAAAGAGATG<br>TGATAAGGATGGATTACGA         |
|         | Qiagen    | 119H9       | SI00715883<br>SI00715890<br>SI00715897<br>SI00715904     | AAGGAAGAATGCAGAGTATAA<br>CAGAGACTATTCAGTACCAAA<br>CAGCGACATCTCACTCATGAA<br>CTGGGTTTGGACAGATTGAAA |
| SF3B1   | Dharmacon | M-020061-00 | D-020061-01<br>D-020061-02<br>D-020061-03<br>D-020061-04 | GGAATTAGATGCTATGTTT<br>GCAAACGAGTCAAACCATA<br>GAACCGCTATTGATTGATG<br>GTAGAATGTTGCAATATTG         |
|         | Qiagen    | 212C9       | SI00715911<br>SI00715918<br>SI00715925<br>SI00715932     | CAGGTTATTATGACCAGGAAA<br>AAGACTCACGAAGATATTGAA<br>GTGGCATTGCTTAATGATATA<br>ACGATGACTATTCATCATCTA |

| HGNC    | Source    | Pool ID     | siRNA ID                                                 | Sequence                                                                                            |
|---------|-----------|-------------|----------------------------------------------------------|-----------------------------------------------------------------------------------------------------|
| SF3B14  | Dharmacon | M-020260-00 | D-020260-01<br>D-020260-02<br>D-020260-03<br>D-020260-04 | GAACACACCTGAAACTAGA<br>TGAAGTAAATCGGATATTG<br>TAACAGATACCTTGTGGTT<br>GAACAGCTTATGTGGTCTA            |
|         | Qiagen    | 134B9       | SI00715939<br>SI00715946<br>SI00715953<br>SI00715960     | TCCGATATTGTATATAAGAAA<br>AACATTGCACTTCCACCTGAA<br>CTGGATGTTGATGTCCTGCAT<br>TTGGAATACATTATGTTAATA    |
| SF3B4   | Dharmacon | M-017190-00 | D-017190-01<br>D-017190-02<br>D-017190-03<br>D-017190-04 | GAGAAGTTGCTTTATGATA<br>GAACAAAGCATCAGCTCAC<br>TGATCAAACCTCTATGGGAA<br>TAACCGTCCTATCACCGTA           |
|         | Qiagen    | 116H9       | SI00716023<br>SI00716030<br>SI00716037<br>SI00716044     | CTGGATGAGAAGGTTAGTGAA<br>CACAGGCAACTCCAAAGGTTA<br>CACCGTATCTTATGCCTTCAA<br>CATGAACATGATCAAACCTCTA   |
| SHCBP1  | Dharmacon | M-016781-00 | D-016781-01<br>D-016781-02<br>D-016781-03<br>D-016781-04 | GATTGTAGCTACCGTGATA<br>CGATTAAGATTGCATTATG<br>GGAGATGTTTGTGGGATT<br>TATAAATGCCTGCTTCGAA             |
|         | Qiagen    | 155G3       | SI00717843<br>SI00717850<br>SI00717857<br>SI00717864     | CTGGGTGTTCTTGTATCATA<br>AAGCAGTTTGTCAAATFTGTA<br>TTGCATAATACTTGTCTTAAA<br>CAAGATATCCATGGTGAATAA     |
| SHROOM2 | Dharmacon | M-011577-00 | D-011577-01<br>D-011577-02<br>D-011577-03<br>D-011577-04 | GAGAATGCCCTCAATAATT<br>GGATGAGGATTCAACCAGA<br>GGACAAGACTCGTGGCCAG<br>GGTATGTTCCCGATAAGAA            |
|         | Qiagen    | 63D4        | SI00299124<br>SI00299180<br>SI00299201<br>SI03101588     | TTCACTCATTCTCAGATTTAAA<br>ATCCTGCTTGACTGTAACAAA<br>CACCTATAAAGACCACCTGAA<br>GACCCTGAAGCTGGTCTGCTCAA |
| SLC26A1 | Dharmacon | M-007488-00 | D-007488-01<br>D-007488-02<br>D-007488-03<br>D-007488-04 | CCACGGAGCTGCTGGTCAT<br>GGGAGTACCTGGCAGGCCGA<br>GGGACACGGCTGAGGAGGA<br>TGGCCAAGAGCCTGGTGAA           |
|         | Qiagen    | 211C7       | SI00722015<br>SI00722022<br>SI00722029<br>SI00722036     | CACGCTGATGACCGGGCTTTA<br>CAGCCTCTATACGTCCTTCTT<br>CAGCCCATCTACAGCCTCTAT<br>AGCCAACAGCAGCACCTCAA     |
| SLC2A13 | Dharmacon | M-007513-00 | D-007513-01<br>D-007513-02<br>D-007513-03<br>D-007513-04 | GGAAGTAACTATCATCTTT<br>GAACAAATCAACTGTCATT<br>GAAGGGAGATATATTGAAT<br>GGAAATTGAATCACTCTTT            |
|         | Qiagen    | 169B9       | SI00722659<br>SI00722666<br>SI00722673<br>SI00722680     | GAGGAATATGATAGCATCAAA<br>AAGGGAGATATATTGAATATA<br>AAGCTTACCTTTGGTAGTTTA<br>AAGGGAAATGTCACATATTAT    |
| SLC39A2 | Dharmacon | M-007570-00 | D-007570-01<br>D-007570-02<br>D-007570-03<br>D-007570-04 | GAGCAGGGTTCATGCATAT<br>GCAGTGTCTCCATACTAT<br>GGTGTGTTGGTGTAGGAATG<br>GCTGGTACCTTCCTGTATG            |
|         | Qiagen    | 131C2       | SI00724535<br>SI00724542<br>SI00724549<br>SI00724556     | CTGGACTAAGACAAAATATT<br>CTCCACAGCCATGGACATTTA<br>CAGACTAAATAGCATTTCAGTA<br>CAGCAAGTGAGAGAAATCTT     |
| SLC3A2  | Dharmacon | M-003542-00 | D-003542-01<br>D-003542-02<br>D-003542-03<br>D-003542-04 | AGAATGGTCTGGTGAAGAT<br>GAAGAATGGTCTGGTGAAG<br>TCACGGGCCTGTCCAAGGA<br>GAGCATCCGTGTCATTCTG            |
|         | Qiagen    | 207D6       | SI02650865<br>SI02650872<br>SI02650879<br>SI02650893     | TCCGGACATAGAGAATCTGAA<br>CAGCCTGACATGGACCCACTA<br>GAGGTGGAGCTGAATGAGTTA<br>ATGGAGCTACAGCCTCCTGAA    |
| SLC45A2 | Dharmacon | M-013153-00 | D-013153-01<br>D-013153-02<br>D-013153-03<br>D-013153-04 | GTACGAGTATGGTTCTATC<br>GATAGGTGTCGTTCTCTTT<br>GTGCATCAACTCCGTGTTT<br>GTCTTTACTTCACGGGATA            |
|         | Qiagen    | 45E4        | SI00114114<br>SI00114121<br>SI00114128<br>SI03104353     | CAGCTTTGATTGCTAACCCAA<br>ATGGACGGCCTTCTGTCCAA<br>TCGCAGGGCAATGACATTA<br>GAGTATGGTTCTATCGAGAAA       |

| HGNC   | Source    | Pool ID     | siRNA ID                                                 | Sequence                                                                                          |
|--------|-----------|-------------|----------------------------------------------------------|---------------------------------------------------------------------------------------------------|
| SMU1   | Dharmacon | M-021129-00 | D-021129-01<br>D-021129-02<br>D-021129-03<br>D-021129-04 | CAACTGAGCAGGCATATTA<br>GACCATAGATTTGTTTCGA<br>GATAGCAGTCAGATCCTTA<br>GACATTACATTATTAAGTGC         |
|        | Qiagen    | 140G2       | SI00727559<br>SI00727566<br>SI00727573<br>SI00727580     | CAGAATGTTCAAATACCTTTA<br>CAGGTTGTTCTGGAATTGATA<br>AAGGATGTGATTGGTATTGCA<br>CCAGATGGAAGTAGCAAAGAA  |
| SMURF1 | Dharmacon | M-007191-00 | D-007191-01<br>D-007191-02<br>D-007191-03<br>D-007191-04 | GCACTATGATCTATATGTT<br>AAAGAGATCTAGTCCAGAA<br>GGAAGAAGGTTTGGATTAC<br>GGACTGCAGAGGACTGTTA          |
|        | Qiagen    | 16A10       | SI00126497<br>SI00126511<br>SI03094756<br>SI03111276     | AAGGATAACCTCGATGATGTA<br>CAGAGATACGAAAGAGATCTA<br>CTGCCCGAAGGCTACGAACAA<br>TAGCGTGTGGAACCATAAGAA  |
| SOCS7  | Dharmacon | M-027197-00 | D-027197-01<br>D-027197-02<br>D-027197-03<br>D-027197-04 | GGAGAAGTGTGGTTGGTAT<br>AAACCCAAGTTGACAAGAA<br>TCCGAAAGTTCTACTACTA<br>AAGCGCAGCTCATTTCCAA          |
|        | Qiagen    | 59F2        | SI00729218<br>SI03074400<br>SI03102687<br>SI03114356     | CCGAAAGTTCTACTACTATGA<br>CCACACTAGAATGGAGCACTA<br>GAGAGCCATTATGCACTCCAA<br>TCCCGATTTCAGCAATGTCAAA |
| SOLH   | Dharmacon | M-006037-00 | D-006037-01<br>D-006037-02<br>D-006037-03<br>D-006037-04 | GATGGAGTACGGCGACTTT<br>CCAAGTGCACGCTCAGAAA<br>GTGAGGGCATGACCTGCTA<br>GGAGACACCGTGCCTTACA          |
|        | Qiagen    | 13D9        | SI00079765<br>SI00079772<br>SI00079779<br>SI00079786     | CCGGCACAAGCCCAGCTCAA<br>ACGGGTGTCCTCGGCCAGAA<br>CTCGTCCACCCTGCAGAACAA<br>CAGGCAGTCTCGTGTACTTT     |
| SON    | Dharmacon | M-012983-00 | D-012983-01<br>D-012983-02<br>D-012983-03<br>D-012983-04 | GCTGAGCGCTCTATGATGT<br>GATACAGAACTACGATATA<br>GGTCTTTTCGTGGTCAGTAA<br>CAATGTCAGTGGAGTATCA         |
|        | Qiagen    | 207F8       | SI00729239<br>SI00729246<br>SI00729253<br>SI00729260     | CAGAATCTTCAATTACGTTAA<br>ATGATGTTGATTTATCTTTAA<br>CTCAGTTTAGTTAATAAATAT<br>AAAGATATTCATCTTGATTTA  |
| SPIC   | Dharmacon | M-016274-00 | D-016274-01<br>D-016274-02<br>D-016274-03<br>D-016274-04 | GATCTTCTATTACAGTGT<br>GAGCCTGTCTATAATTGGA<br>GTGCTGCGGACTTCTATTT<br>GTATTCAGTGGGTAGATAA           |
|        | Qiagen    | 172D3       | SI00731591<br>SI00731598<br>SI00731605<br>SI00731612     | TTGGGAAATTCTGCCAATGAA<br>ATCAAGAATATCTCAGTTTAA<br>CAGAATTGTCAATTTATTAAT<br>AACCATCGTCCTCATGTCAAA  |
| SPIN2A | Dharmacon | M-021182-00 | D-021182-01<br>D-021182-02<br>D-021182-03<br>D-021182-04 | GCAAATACCATAATTGGCA<br>TAGGTAAGCATGTGGAATA<br>GCTCAAGCACCTATCATGA<br>AGGCAGACCTTCATCCCAA          |
|        | Qiagen    | 135F9       | SI00731647<br>SI00731654<br>SI00731661<br>SI00731668     | CAGGGACTGGTGGCAGCCCAA<br>CAAATTTGTGAATACATGAAA<br>CACTGTAGTCTTGTGCAGAAA<br>TCACTACTAAGAGGAAACTAA  |
| SPP2   | Dharmacon | M-019720-00 | D-019720-01<br>D-019720-02<br>D-019720-03<br>D-019720-04 | GCACAGAGCAAGAATAAAT<br>GAAGATCCCGCTACATGTG<br>CAGAGGGACTACTATGTGT<br>TACGATCCATCCTCCTTAA          |
|        | Qiagen    | 105E5       | SI00732235<br>SI00732242<br>SI00732249<br>SI00732256     | CCGGCACAGAGCAAGAATAAA<br>CTGATCAGTTTCAATCTGTAA<br>AACAACTTGGTCATGAATTTA<br>CCGGGAGACTACATGCAGGAA  |
| SPTA1  | Dharmacon | M-019726-00 | D-019726-01<br>D-019726-02<br>D-019726-03<br>D-019726-04 | GGACAAAGCTTGGAGACTA<br>GCACCGAAGTCTGCATAA<br>GCAGAGGGCAAGTCATATA<br>GAACCACGCATTCAAGAGA           |
|        | Qiagen    | 105C6       | SI00732655<br>SI00732662<br>SI00732669<br>SI00732676     | TTGGAATGTGTTTAAATTTAA<br>CAGGCAAATGTGGAAGATAAA<br>TCCGATTATAGAATAAAGTAA<br>ATGGTATAGTAGATAAATAAA  |

| HGNC     | Source    | Pool ID     | siRNA ID                                                 | Sequence                                                                                          |
|----------|-----------|-------------|----------------------------------------------------------|---------------------------------------------------------------------------------------------------|
| SUPT6H   | Dharmacon | M-010540-01 | D-010540-01<br>D-010540-03<br>D-010540-04<br>D-010540-05 | GAACATGACTTCACAGATG<br>CCAGAGACCTTCTACATTG<br>AAAGAAGGCTCAAGACATT<br>CAGCATAGATTTGAAGGGA          |
|          | Qiagen    | 105D9       | SI00736575<br>SI00736582<br>SI00736589<br>SI00736596     | TAGGAGCATCTTTGAAATGTA<br>CAGACAATTTCAGAAGATCAA<br>CAGGACAATTTCCCTGAACTA<br>TACAATGAGTATGATGAAGAA  |
| SYTL2    | Dharmacon | M-013555-00 | D-013555-01<br>D-013555-02<br>D-013555-03<br>D-013555-04 | GAAACTAGCTCTCCAGTAT<br>GGGAGAAGATGGTAAACTC<br>CATTTAAGCGCAATAGTTT<br>GGGATAACAAACAGAATAA          |
|          | Qiagen    | 215C9       | SI00738143<br>SI00738150<br>SI00738157<br>SI00738164     | CCGGTGGAAATCTGATCTTGAA<br>AAGGGATTTAAATATAACAAA<br>AAGAACTATTTACTCTGTAA<br>CTGGGATAACAAACAGAATAA  |
| TAGLN    | Dharmacon | M-003714-01 | D-003714-02<br>D-003714-03<br>D-003714-04<br>D-003714-05 | AGAAAGCGCAGGAGCATAA<br>CCAGACTGTTGACCTCTTT<br>CTCGGCAGATCATCAGTTA<br>CCAAAATCGAGAAGAAGTA          |
|          | Qiagen    | 207D11      | SI00739151<br>SI00739158<br>SI00739165<br>SI00739172     | CAGCTTGGCAGTGACCAAGAA<br>CAGACTGTTGACCTCTTTGAA<br>CCCAACTGGTTTATGAAGAAA<br>TCCCAACTGGTTTATGAAGAA  |
| TLN1     | Dharmacon | M-012949-00 | D-012949-01<br>D-012949-02<br>D-012949-03<br>D-012949-04 | GGAAATAACAGGGACCTTA<br>GAAGAGATAGGTTCCCATTA<br>GAAGATGGTTGGCGGCATT<br>GAGATGAGGAGTCTACTAT         |
|          | Qiagen    | 6C8         | SI00086961<br>SI00086968<br>SI00086975<br>SI00086982     | CAGCTCGAGATGGCAAGCTTA<br>CAGGGCAATGAGAATTATGCA<br>CCGCATTTGGCATCACCAATCA<br>TGGGAAAGCTTTGGACTACTA |
| TMBIM4   | Dharmacon | M-020255-00 | D-020255-01<br>D-020255-02<br>D-020255-03<br>D-020255-04 | CACACTCACTGATGCATAA<br>CCGAATGGCCTTTCTGAGA<br>ACATGAGAGTCCTGCCTTA<br>GAAGAGTACGTATTAGCTG          |
|          | Qiagen    | 134D9       | SI00344477<br>SI00344484<br>SI00344491<br>SI00344498     | CCGAATGGCCTTTCTGAGAAA<br>TTGATTTAGGATCTCAGTTAA<br>ACGGTTTCTGGAAGCAGTTAA<br>CACACACTCACTGATGCATAA  |
| TMEM61   | Dharmacon | M-018940-00 | D-018940-01<br>D-018940-02<br>D-018940-03<br>D-018940-04 | CCAAGTGGATCGAGGGATG<br>TATGAGAGCATCAGCCTTG<br>GGGACGCTCTGCTTCGCTT<br>CCTCCACCCTCCGCTATTG          |
|          | Qiagen    | 185G8       | SI00485324<br>SI00485331<br>SI00485338<br>SI00485345     | CAGCAAACGTTCTGTTGTTGAA<br>CCCAGAATTTAGTGGCTTAAA<br>CAGGTCCTGAATCCAGAGACA<br>CACTGTGGAGTCTCAGAGAA  |
| TMOD1    | Dharmacon | M-019747-00 | D-019747-01<br>D-019747-02<br>D-019747-03<br>D-019747-04 | TGATTAACCCACACAATA<br>GCAAAGGAGTTTAAGGACC<br>GTAGAAGCCCTCCCATACA<br>ACGCAATGATGAACAACAA           |
|          | Qiagen    | 106C7       | SI00748223<br>SI00748230<br>SI00748237<br>SI00748244     | TTGAATCTGGTTATTATTTAA<br>CCGACGAAGAACCAAATTCAA<br>CTGGATGAAGATGAAATCCTT<br>CAAGGTGTTGAAGACACTGAA  |
| TMPRSS9  | Dharmacon | M-019463-00 | D-019463-01<br>D-019463-02<br>D-019463-03<br>D-019463-04 | ACAAATACATCCAGCCTGT<br>GACGACAGCTGGCCTCACA<br>GGTCACCGTTCCCTAAGCTA<br>GAGCTCACAGGGAGACATA         |
|          | Qiagen    | 15A7        | SI00163303<br>SI00163310<br>SI00163317<br>SI00163324     | CACGCGCATCACCAGGCTAAA<br>CCAGGTGGTCCAGATCGTCAA<br>CGGGCCAACCTGCCAACTCAA<br>ACCGTTCCTAAGCTACAAGAA  |
| TNFRSF1A | Dharmacon | M-005197-00 | D-005197-01<br>D-005197-02<br>D-005197-03<br>D-005197-04 | CAAAGGAACCTACTTGTAC<br>GAGCTTGAAGGAACTACTA<br>CACAGAGCCTAGACACTGA<br>TCCAAGCTCTACTCCATTG          |
|          | Qiagen    | 54E3        | SI00021462<br>SI00021476<br>SI03044349<br>SI03097192     | ACCGGCATTATTGGAGTGAAG<br>ACGGTGGAAAGTCCAAGCTCTA<br>AGGAACCTACTTGTACAATGA<br>CTGGAGCTGTTGGTGGGAATA |

| HGNC   | Source    | Pool ID     | siRNA ID                                                 | Sequence                                                                                          |
|--------|-----------|-------------|----------------------------------------------------------|---------------------------------------------------------------------------------------------------|
| TNPO2  | Dharmacon | M-020491-01 | D-020491-01<br>D-020491-03<br>D-020491-04<br>D-020491-05 | GGGCAGAGATGCAGCCTTA<br>GCAGTTCTCTGAGCAATTC<br>AAACAGGAGTGTCTCAACA<br>GCGCTGATGGACAATATTG          |
|        | Qiagen    | 131G2       | SI02652027<br>SI02652034<br>SI02652041<br>SI02652048     | CCCCAGCATCTCTCTGTAA<br>ATCGTGCAGGATAAACTCAAA<br>CAGGAGTGTCTCAACAACATT<br>AAAGATCAGTTTCTTGTGAAA    |
| TPX2   | Dharmacon | M-010571-00 | D-010571-01<br>D-010571-02<br>D-010571-03<br>D-010571-04 | TGACAACACTTACTACAAA<br>GGACGAACCGGTAGTGATA<br>AGACAAAGAACGTCAGTTA<br>GAACTTTACATCTGAACTA          |
|        | Qiagen    | 39B5        | SI00097195<br>SI02665075<br>SI02665082<br>SI03063368     | TAGGCCTGATAGACTGATTA<br>AAGGATGATATTAACCTGTTA<br>AAGGCTAATAATGAGATGTAA<br>CAGAATTCGAATGCCACCAA    |
| TRAIP  | Dharmacon | M-006924-00 | D-006924-01<br>D-006924-02<br>D-006924-03<br>D-006924-04 | AGAATGAACTGGACAATGT<br>GTTGGTGCCTTCCCTATTT<br>ACAGAGTGCTGACAAGGAA<br>GACAGTCTACTCTGAATTG          |
|        | Qiagen    | 40G7        | SI00082236<br>SI00082243<br>SI02225608<br>SI02225615     | CCGGCTCAGGAGCAAGATGAA<br>AAGGAAATCATGAGCCTGAAA<br>CCGTGATGATATTGATCTCAA<br>CGGGACCAGCCTGAGGTGTAA  |
| TRIM17 | Dharmacon | M-006981-00 | D-006981-01<br>D-006981-02<br>D-006981-03<br>D-006981-04 | GCTAAGAGGCTTTCTAGAG<br>GGAAGAACAACGTGAGTGT<br>GGTCCCACCTGCACACCTA<br>GAGCGGAGAGAACGCATTG          |
|        | Qiagen    | 1F10        | SI00113302<br>SI00113309<br>SI00113316<br>SI00113323     | CCCGGACAGATTGAAGTGCTA<br>CAGGGACAACGTGAGCCGGAA<br>CACAGTGACCATGTGGGTGAA<br>ACGCATTGTGCTGGAGTTGA   |
| TRIM9  | Dharmacon | M-012974-00 | D-012974-01<br>D-012974-02<br>D-012974-03<br>D-012974-04 | CCACAGGTCTCATGGAGTA<br>GCTTGGAGGTGATTAAGGA<br>CAACGGCGTCCGCGTGTTC<br>AAACAGGAGTCAGCCCGTA          |
|        | Qiagen    | 21H6        | SI00147546<br>SI03067197<br>SI03070634<br>SI03081162     | CCCAAGAATCGCGTACTGGAA<br>CAGCGCTACGTTGTCCTGGAA<br>CAGGCGCTGAACGGACTGTCA<br>CCGCGTCAACAAGGAGCATGA  |
| TRPM8  | Dharmacon | M-006517-00 | D-006517-01<br>D-006517-02<br>D-006517-03<br>D-006517-04 | GGAATCAGCTAGAGAAGTA<br>CGAATGTTCTCACCTATTA<br>GAAGAAACCTGTTCGACAAG<br>GCAATGGTATGGAGAGATT         |
|        | Qiagen    | 31D3        | SI00135744<br>SI00135758<br>SI00135765<br>SI03023118     | TCGAATGTTCTCACCTATTAA<br>CAGAATGTTATCATACTACAT<br>CCGGGACGAGATGGACATAGA<br>TTCGGTCATCTACGAGCCCTA  |
| TSPAN9 | Dharmacon | M-012293-00 | D-012293-01<br>D-012293-02<br>D-012293-03<br>D-012293-04 | GAGATGCGATGCTGTGGTG<br>TAAGAAGTACGACGCATGA<br>GCAGAGCTGATCTTACTCA<br>AAGAACGCCTGGAACATCA          |
|        | Qiagen    | 119A6       | SI00657587<br>SI00657594<br>SI00657601<br>SI00657608     | TTCAGAGAGAACAGAATTTAA<br>CTGGTTTGACTTGGAAC TAGA<br>CTGCTAGAAACTGTCAGACAA<br>CTGCATATGCGTATTTGCCAA |
| TUBE1  | Dharmacon | M-006844-00 | D-006844-01<br>D-006844-02<br>D-006844-03<br>D-006844-04 | CGAAACAGCTCATCACTGA<br>GGACTTGGCACATTTCTTTT<br>CAAAGAGTCTGGTFACTTC<br>CGAGCAGTCTTGATTGATA         |
|        | Qiagen    | 42D10       | SI00114884<br>SI02777558<br>SI02777565<br>SI03060211     | CACGAGCAGTCTTGATTGATA<br>TAGTGAAATCTTAGTACCTTA<br>CAAGATTTGAAGGGTCCCTTA<br>CACGCCGCGGTCAACCAGAAA  |
| UBE2D2 | Dharmacon | M-010383-01 | D-010383-02<br>D-010383-03<br>D-010383-04<br>D-010383-05 | TCAGAAGTATGCGATGTAA<br>CTATCAGGGTGGAGTATTT<br>GTCCATCTGTTCTCTGTTG<br>TGAATGATCTGGCACGGGA          |
|        | Qiagen    | 208H3       | SI00754383<br>SI00754390<br>SI00754397<br>SI00754404     | TAGCTTGAACTTGTAACAAA<br>ATGATTAATCTGTGTAATAAA<br>TTGGATAACCTTCACAAATAA<br>TTCCAGGAACTTGATTGTAA    |

| HGNC    | Source    | Pool ID     | siRNA ID                                                 | Sequence                                                                                          |
|---------|-----------|-------------|----------------------------------------------------------|---------------------------------------------------------------------------------------------------|
| UBOX5   | Dharmacon | M-006949-00 | D-006949-01<br>D-006949-02<br>D-006949-03<br>D-006949-04 | GAACGTCCTGGCCTGGAA<br>GACAGTAACTTTGGTGTAA<br>GTACACATCTGCCTCATCT<br>GAGCAGAAGCTGTACAAA            |
|         | Qiagen    | 11H11       | SI00108899<br>SI00108920<br>SI03067358<br>SI03077361     | CAGACAGTAACTTTGGTGTAA<br>TCCCTACAACCTTGGTACTCTA<br>CAGCGGCCGGTTGCTAGCCAA<br>CCCGAATGTGCCTCCTGCAA  |
| USP1    | Dharmacon | M-006061-01 | D-006061-02<br>D-006061-03<br>D-006061-05<br>D-006061-06 | GCATAGAGATGGACAGTAT<br>GAAATACACAGCCAAGTAA<br>CATAGTGGCATTACAATTA<br>TAACGACAGCTATGGATTA          |
|         | Qiagen    | 107E3       | SI00758107<br>SI00758114<br>SI00758121<br>SI00758128     | TTGGGCCATGACCAGATATAA<br>CTCGCGCGCACGAATGGTTAA<br>TTCAAAGGACGCCACGTTCAA<br>CTGGCGCGGGCGGAGGCTAAA  |
| USP18   | Dharmacon | M-004236-02 | D-004236-03<br>D-004236-04<br>D-004236-05<br>D-004236-06 | GGAATTCACAGACGAGAAA<br>GGAAGAAGACAGCAACATG<br>GGGAAGACATCCAGTGTAC<br>CCAGGGAGTTATCAAGCAA          |
|         | Qiagen    | 16D5        | SI00118034<br>SI00118041<br>SI03022915<br>SI03097570     | TAAGCGCTTCTGGAAAGTGAA<br>AAGATGGAGTGTCTAATGGAAA<br>TTCGCTTTCCATTCAAGTAAA<br>CTGGATCTACGGAGTCTTCTA |
| VAX1    | Dharmacon | M-031769-00 | D-031769-01<br>D-031769-02<br>D-031769-03<br>D-031769-04 | GAAGAAAGAGCCAGCAAAT<br>CGAAGAACGCGCACAAAGGA<br>GTTTCGGGAAACCAGACAAA<br>ACGATTCAAACGCGGGATA        |
|         | Qiagen    | 120G4       | SI00759451<br>SI00759458<br>SI00759465<br>SI00759472     | ACCCTTTATAGTTTACAAATA<br>TCGGGAAATCTTTACATTTCA<br>CACTGCGTAATTCTTAGTTTA<br>TCCCATCTGATGAATCAGAAA  |
| WBSCR22 | Dharmacon | M-009383-00 | D-009383-01<br>D-009383-02<br>D-009383-03<br>D-009383-04 | GAAATACGTTTCGCAACTCA<br>GAGAGGTTCCCATTAAGGA<br>GCCCTGCCATGCTGGATGA<br>CATTGGAGCTTCTTTATCT         |
|         | Qiagen    | 2A6         | SI00118671<br>SI02757993<br>SI02758000<br>SI03088449     | CTGAGTGGAAAGTTATCTGTCA<br>CAGGGAGTCTGTGTTCACCAA<br>CCCTAACAGTGCCAAAGCAA<br>CTCACGGATGATTGATATCCA  |
| WEE1    | Dharmacon | M-005050-00 | D-005050-01<br>D-005050-02<br>D-005050-03<br>D-005050-04 | GCAGAACAAATTACGAATAG<br>TAGAACATCTCGACTTATT<br>GATCATATGCTTATACAGA<br>AATCGGCTCTGGAGAATTT         |
|         | Qiagen    | 85B5        | SI00051758<br>SI02631076<br>SI02758791<br>SI02758798     | CAGGGTAGATTACCTCGGATA<br>TTGACTAATAATACTGGCTAA<br>CAAGACCTGCTAAGAGAATTA<br>ACAATTACGAATAGAATTGAA  |
| WHSC1L1 | Dharmacon | M-012875-00 | D-012875-01<br>D-012875-02<br>D-012875-03<br>D-012875-04 | CAAGACAGGCTTATAATTT<br>GAACGTGCTCAGTGGGATA<br>GTCCACTGGTGTAAAGTTT<br>GCTTGAGGTTCACTACTAAA         |
|         | Qiagen    | 51H11       | SI03040912<br>SI03047352<br>SI03076773<br>SI03109505     | ACGACCAAGATCTGTGCTGAA<br>ATCCACTGAGGTTGTGCCAAA<br>CCCAGCTTGAGGTTTCACTA<br>TACGAGAGTATAAAGGTCATA   |
| ZNF331  | Dharmacon | M-021386-00 | D-021386-01<br>D-021386-02<br>D-021386-03<br>D-021386-04 | GTAAATCCCTTGGCCGTAA<br>CGACGTAGCCATAGACTTT<br>GGAGGTATGTCAATCAGAT<br>GGCCTTTACTCGAGTCAAT          |
|         | Qiagen    | 141H3       | SI00772443<br>SI00772450<br>SI00772457<br>SI00772464     | CACCAGGATGATTAATTTAA<br>CACCAAATGGCCAATAAGTAA<br>CTGGAGGACAAGAGGAAGTAA<br>CACGGCCATCAGCTTACACAA   |
| ZNF585A | Dharmacon | M-016843-00 | D-016843-01<br>D-016843-02<br>D-016843-03<br>D-016843-04 | CGACAGAAGTCAGAGTTGA<br>GGCAAAGCGTTCACACAAA<br>GGACCATAATCAACATAGA<br>AGAAATCAGTGTTCAAGTGT         |
|         | Qiagen    | 222C3       | SI00777147<br>SI00777154<br>SI00777161<br>SI00777168     | AAGGATGTAACCTTTCATGTAA<br>AAGAAAGATCGTATTAAGTTA<br>CAGATTAATAACTTATATGAA<br>ATCGTATTAAGTTAACGATAA |

| HGNC   | Source    | Pool ID     | siRNA ID    | Sequence              |
|--------|-----------|-------------|-------------|-----------------------|
| ZNF595 | Dharmacon | M-018879-00 | D-018879-01 | CCACAACACTGAACGAACA   |
|        |           |             | D-018879-02 | CCACATCACTTAGTAAACA   |
|        |           |             | D-018879-03 | TACCAGTGCTTGTCAACTA   |
|        |           |             | D-018879-04 | CCTCAACTCTTATATTACA   |
|        | Qiagen    | 181D5       | SI00777371  | AAGTATATGAGTATAATTATA |
|        |           |             | SI00777378  | CACACATTTCTAAGTCATGAA |
|        |           |             | SI00777385  | CAGTCCAGTTATACACTTTAA |
|        |           |             | SI00777392  | CAGGCATATGACATGTAATTA |

Table XII: siRNA sequences. HGNC is the target HGNC gene name. Source is the siRNA source. Pool ID is the siRNA pool ID. siRNA ID is the single siRNA ID. Sequence is the siRNA sequence.
